# Supplementary material for: Proteomic responses in Arabidopsis thaliana seedlings treated with ethylene
Source: Royal Society of Chemistry journal article supplement (doi:10.1039/c1mb05159h), 2011-06-29
Supplement: c1mb05159h.zip [file c1mb05159h.zip]

# **Mascot Search Results**

## Peptide View

MS/MS Fragmentation of **YSSMPDISGLSMSAR**

Found in **AT5G03280.1**, | Symbols: EIN2, PIR2, CKR1, ERA3, ORE3, ORE2 | EIN2 (ETHYLENE INSENSITIVE 2); transporter | chr5:788588-793065 FORWARD

Match to Query 9: 1680.695404 from(841.354978,2+)

Title: PR4acn\_grad.4816.4816.2.dta

Data file C:\Users\CooperB\Desktop\Ray\mgfs\MS2special.txt

Click mouse within plot area to zoom in by factor of two about that point

Or,  200 to 1600 Da

Label all possible matches ☐ Label matches used for scoring ☒

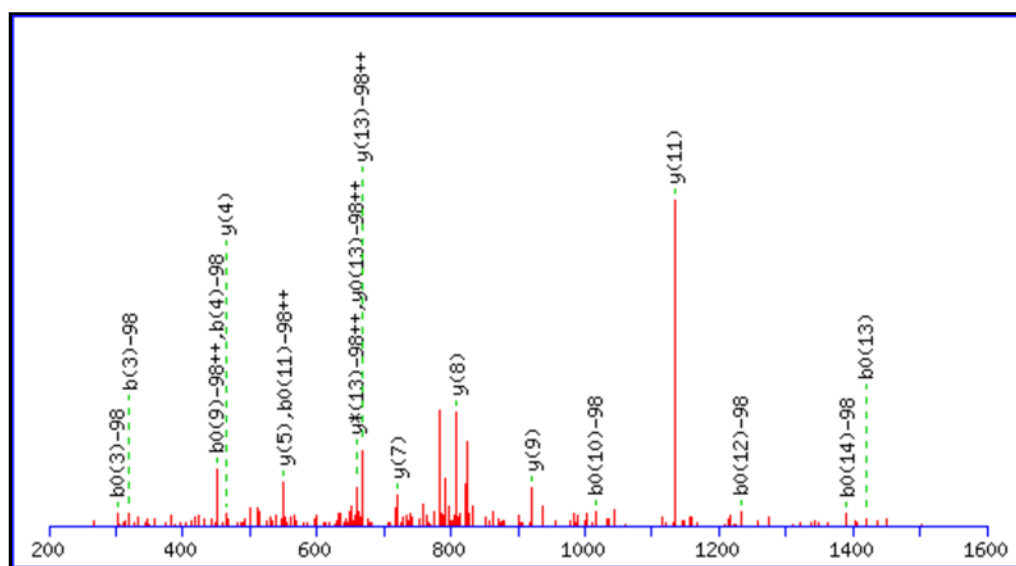

Monoisotopic mass of neutral peptide Mr(calc): 1680.6888

Fixed modifications: Carbamidomethyl (C) (apply to specified residues or termini only)

Variable modifications:

S3 : Phospho (ST), with neutral losses 97.9769(shown in table), 0.0000

Ions Score: 30 Expect: 0.026

Matches : 18/194 fragment ions using 25 most intense peaks ([help](#))

| #  | b         | b <sup>++</sup> | b <sup>0</sup> | b <sup>0++</sup> | Seq. | y         | y <sup>++</sup> | y*        | y <sup>*++</sup> | y <sup>0</sup> | y <sup>0++</sup> | #  |
|----|-----------|-----------------|----------------|------------------|------|-----------|-----------------|-----------|------------------|----------------|------------------|----|
| 1  | 164.0706  | 82.5389         |                |                  | Y    |           |                 |           |                  |                |                  | 15 |
| 2  | 251.1026  | 126.0550        | 233.0921       | 117.0497         | S    | 1420.6559 | 710.8316        | 1403.6294 | 702.3183         | 1402.6453      | 701.8263         | 14 |
| 3  | 320.1241  | 160.5657        | 302.1135       | 151.5604         | S    | 1333.6239 | 667.3156        | 1316.5973 | 658.8023         | 1315.6133      | 658.3103         | 13 |
| 4  | 451.1646  | 226.0859        | 433.1540       | 217.0806         | M    | 1264.6024 | 632.8048        | 1247.5759 | 624.2916         | 1246.5919      | 623.7996         | 12 |
| 5  | 548.2173  | 274.6123        | 530.2068       | 265.6070         | P    | 1133.5619 | 567.2846        | 1116.5354 | 558.7713         | 1115.5514      | 558.2793         | 11 |
| 6  | 663.2443  | 332.1258        | 645.2337       | 323.1205         | D    | 1036.5092 | 518.7582        | 1019.4826 | 510.2449         | 1018.4986      | 509.7529         | 10 |
| 7  | 776.3284  | 388.6678        | 758.3178       | 379.6625         | I    | 921.4822  | 461.2448        | 904.4557  | 452.7315         | 903.4717       | 452.2395         | 9  |
| 8  | 863.3604  | 432.1838        | 845.3498       | 423.1785         | S    | 808.3982  | 404.7027        | 791.3716  | 396.1894         | 790.3876       | 395.6974         | 8  |
| 9  | 920.3818  | 460.6946        | 902.3713       | 451.6893         | G    | 721.3661  | 361.1867        | 704.3396  | 352.6734         | 703.3556       | 352.1814         | 7  |
| 10 | 1033.4659 | 517.2366        | 1015.4553      | 508.2313         | L    | 664.3447  | 332.6760        | 647.3181  | 324.1627         | 646.3341       | 323.6707         | 6  |

|           |           |          |                  |                 |          |                 |          |          |          |          |          |          |
|-----------|-----------|----------|------------------|-----------------|----------|-----------------|----------|----------|----------|----------|----------|----------|
| <b>11</b> | 1120.4979 | 560.7526 | 1102.4874        | <b>551.7473</b> | <b>S</b> | <b>551.2606</b> | 276.1339 | 534.2341 | 267.6207 | 533.2500 | 267.1287 | <b>5</b> |
| <b>12</b> | 1251.5384 | 626.2728 | <b>1233.5279</b> | 617.2676        | <b>M</b> | <b>464.2286</b> | 232.6179 | 447.2020 | 224.1047 | 446.2180 | 223.6126 | <b>4</b> |
| <b>13</b> | 1338.5704 | 669.7889 | 1320.5599        | 660.7836        | <b>S</b> | 333.1881        | 167.0977 | 316.1615 | 158.5844 | 315.1775 | 158.0924 | <b>3</b> |
| <b>14</b> | 1409.6076 | 705.3074 | <b>1391.5970</b> | 696.3021        | <b>A</b> | 246.1561        | 123.5817 | 229.1295 | 115.0684 |          |          | <b>2</b> |
| <b>15</b> |           |          |                  |                 | <b>R</b> | 175.1190        | 88.0631  | 158.0924 | 79.5498  |          |          | <b>1</b> |

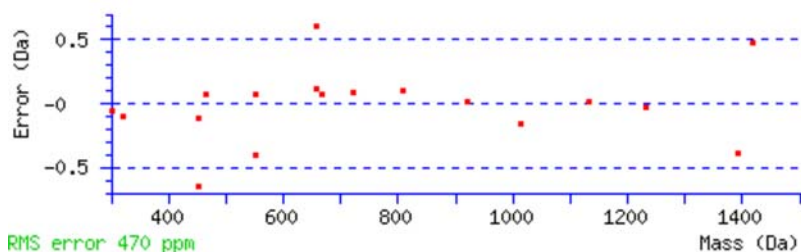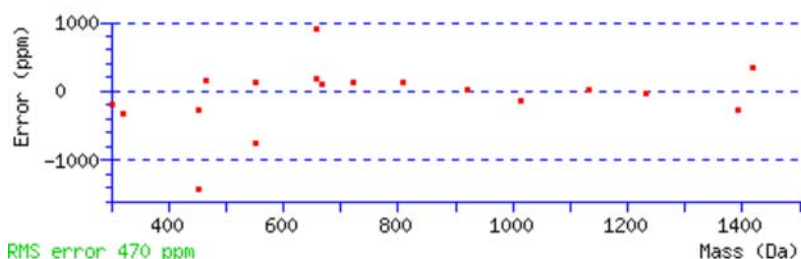

NCBI **BLAST** search of [YSSMPDISGLSMSAR](#)

(Parameters: blastp, nr protein database, expect=20000, no filter, PAM30)

Other BLAST [web gateways](#)

#### All matches to this query

| Score | Mr(calc): | Delta  | Sequence                        |
|-------|-----------|--------|---------------------------------|
| 29.9  | 1680.6888 | 0.0066 | <a href="#">YSSMPDISGLSMSAR</a> |
| 29.7  | 1680.6888 | 0.0066 | <a href="#">YSSMPDISGLSMSAR</a> |
| 5.6   | 1680.6888 | 0.0066 | <a href="#">YSSMPDISGLSMSAR</a> |

neutral loss -98, S3 -18  
neutral loss -98, S2 -18  
neutral loss -98, S8 -18

MS2: High score 29.9, match probability 97%; +2 charge; b ion found for S3 [-18] but second rank position match is very close in score. Hedged to S3 but likely ambiguous because of close scores.

Mascot: <http://www.matrixscience.com/>
