# Supplementary material for: Proteomic responses in Arabidopsis thaliana seedlings treated with ethylene
Source: Royal Society of Chemistry journal article supplement (doi:10.1039/c1mb05159h), 2011-06-29
Supplement: c1mb05159h.zip [file c1mb05159h.zip]

### Peptide View

MS/MS Fragmentation of **LSNKPVGMNODGPGSR**

Found in **AT5G03280.1**, | Symbols: EIN2, PIR2, CKR1, ERA3, ORE3, ORE2 | EIN2 (ETHYLENE INSENSITIVE 2); transporter | chr5:788588-793065 FORWARD

Match to Query 10: 1735.769994 from(868.892273,2+)

Title: PR460 % Salt.2922.2922.2.dta

Data file C:\Users\CooperB\Desktop\Ray\mgfs\MS2special.txt

Click mouse within plot area to zoom in by factor of two about that point

Or, Plot from 300 to 1600 Da Full range

Label all possible matches ☐ Label matches used for scoring ☒

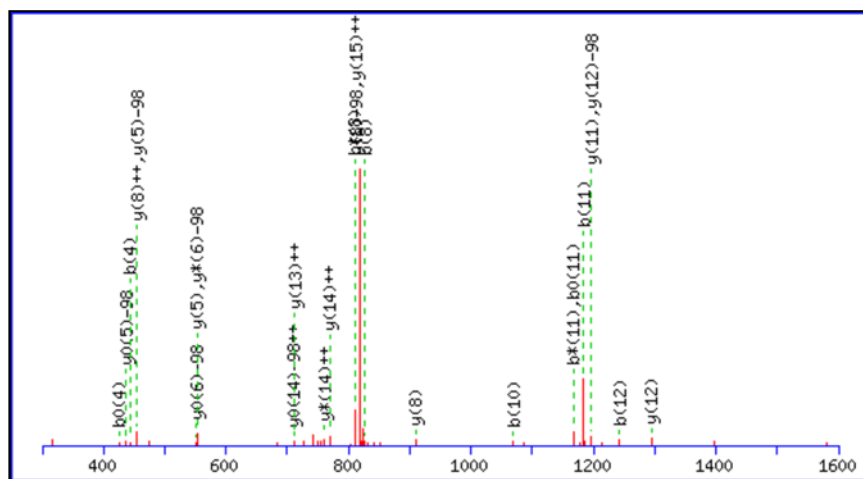

Monoisotopic mass of neutral peptide Mr(calc): 1735.7713

**Fixed modifications:** Carbamidomethyl (C) (apply to specified residues or termini only)

Variable modifications:

**S15** : Phospho (ST), with neutral losses 0.0000(shown in table), 97.9769

Ions Score: 27 Expect: 0.068

```

Matches : 25/262 fragment ions using 33 most intense peaks (help)

```

| #  | b         | b <sup>++</sup> | b*        | b <sup>*++</sup> | b <sup>0</sup> | b <sup>0++</sup> | Seq. | y         | y <sup>++</sup> | y*        | y <sup>*++</sup> | y <sup>0</sup> | y <sup>0++</sup> | #  |
|----|-----------|-----------------|-----------|------------------|----------------|------------------|------|-----------|-----------------|-----------|------------------|----------------|------------------|----|
| 1  | 114.0913  | 57.5493         |           |                  |                |                  | L    |           |                 |           |                  |                |                  | 16 |
| 2  | 201.1234  | 101.0653        |           |                  | 183.1128       | 92.0600          | S    | 1623.6945 | 812.3509        | 1606.6679 | 803.8376         | 1605.6839      | 803.3456         | 15 |
| 3  | 315.1663  | 158.0868        | 298.1397  | 149.5735         | 297.1557       | 149.0815         | N    | 1536.6625 | 768.8349        | 1519.6359 | 760.3216         | 1518.6519      | 759.8296         | 14 |
| 4  | 443.2613  | 222.1343        | 426.2347  | 213.6210         | 425.2507       | 213.1290         | K    | 1422.6195 | 711.8134        | 1405.5930 | 703.3001         | 1404.6090      | 702.8081         | 13 |
| 5  | 540.3140  | 270.6606        | 523.2875  | 262.1474         | 522.3035       | 261.6554         | P    | 1294.5246 | 647.7659        | 1277.4980 | 639.2527         | 1276.5140      | 638.7606         | 12 |
| 6  | 639.3824  | 320.1949        | 622.3559  | 311.6816         | 621.3719       | 311.1896         | V    | 1197.4718 | 599.2395        | 1180.4453 | 590.7263         | 1179.4612      | 590.2343         | 11 |
| 7  | 696.4039  | 348.7056        | 679.3774  | 340.1923         | 678.3933       | 339.7003         | G    | 1098.4034 | 549.7053        | 1081.3769 | 541.1921         | 1080.3928      | 540.7001         | 10 |
| 8  | 827.4444  | 414.2258        | 810.4178  | 405.7126         | 809.4338       | 405.2205         | M    | 1041.3819 | 521.1946        | 1024.3554 | 512.6813         | 1023.3714      | 512.1893         | 9  |
| 9  | 941.4873  | 471.2473        | 924.4608  | 462.7340         | 923.4767       | 462.2420         | N    | 910.3415  | 455.6744        | 893.3149  | 447.1611         | 892.3309       | 446.6691         | 8  |
| 10 | 1069.5459 | 535.2766        | 1052.5193 | 526.7633         | 1051.5353      | 526.2713         | Q    | 796.2985  | 398.6529        | 779.2720  | 390.1396         | 778.2880       | 389.6476         | 7  |
| 11 | 1184.5728 | 592.7901        | 1167.5463 | 584.2768         | 1166.5623      | 583.7848         | D    | 668.2399  | 334.6236        | 651.2134  | 326.1103         | 650.2294       | 325.6183         | 6  |
| 12 | 1241.5943 | 621.3008        | 1224.5677 | 612.7875         | 1223.5837      | 612.2955         | G    | 553.2130  | 277.1101        | 536.1865  | 268.5969         | 535.2024       | 268.1049         | 5  |
| 13 | 1338.6471 | 669.8272        | 1321.6205 | 661.3139         | 1320.6365      | 660.8219         | P    | 496.1915  | 248.5994        | 479.1650  | 240.0861         | 478.1810       | 239.5941         | 4  |
| 14 | 1395.6685 | 698.3379        | 1378.6420 | 689.8246         | 1377.6580      | 689.3326         | G    | 399.1388  | 200.0730        | 382.1122  | 191.5598         | 381.1282       | 191.0677         | 3  |
| 15 | 1562.6669 | 781.8371        | 1545.6403 | 773.3238         | 1544.6563      | 772.8318         | S    | 342.1173  | 171.5623        | 325.0908  | 163.0490         | 324.1067       | 162.5570         | 2  |
| 16 |           |                 |           |                  |                |                  | R    | 175.1190  | 88.0631         | 158.0924  | 79.5498          |                |                  | 1  |

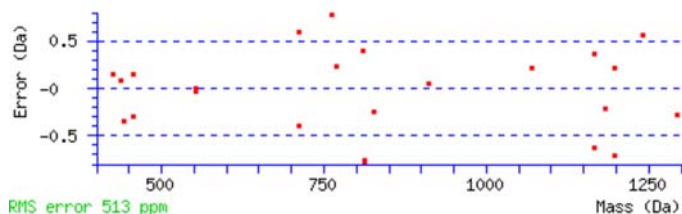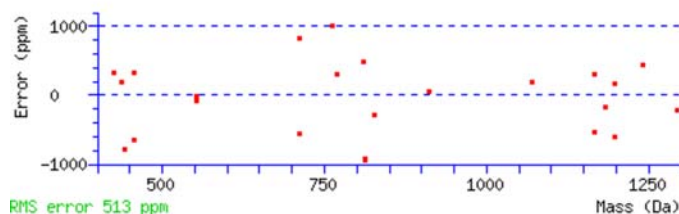

NCBI BLAST search of [LSNKPVG MNQDGP GSR](#)

(Parameters: blastp, nr protein database, expect=20000, no filter, PAM30)

Other BLAST [web gateways](#)

All matches to this query

| Score | Mr(calc): | Delta   | Sequence                            |
|-------|-----------|---------|-------------------------------------|
| 26.7  | 1735.7713 | -0.0013 | <a href="#">LSNKPVG MNQDGP GSR</a>  |
| 17.8  | 1735.7851 | -0.0151 | <a href="#">ELEKSHNEMLEG IK</a>     |
| 13.4  | 1735.7770 | -0.0070 | <a href="#">MQWGV AQRC DGTP SK</a>  |
| 12.5  | 1735.7562 | 0.0138  | <a href="#">ELVLNNALMDMY SK</a>     |
| 12.5  | 1735.7562 | 0.0138  | <a href="#">ELVLNNALMDMY SK</a>     |
| 11.4  | 1734.7569 | 1.0131  | <a href="#">IVAGMEGTVMTDG KSK</a>   |
| 9.4   | 1735.7641 | 0.0059  | <a href="#">DVVSWNKMINGYS K</a>     |
| 7.6   | 1734.7648 | 1.0052  | <a href="#">GSISFQEQASCKVK</a>      |
| 7.0   | 1735.7543 | 0.0157  | <a href="#">SGGSSAASKGGATIG QLK</a> |
| 7.0   | 1735.7543 | 0.0157  | <a href="#">SGGSSAASKGGATIG QLK</a> |

MS2: Only position assignment is top score of 26.7; match probability of 93%; +2 charge, no -98 neutral loss, S15 [+80] is deduced from other ions. Low positioning confidence.

Mascot: <http://www.matrixscience.com/>
