# Supplementary material for: Proteomic responses in Arabidopsis thaliana seedlings treated with ethylene
Source: Royal Society of Chemistry journal article supplement (doi:10.1039/c1mb05159h), 2011-06-29
Supplement: c1mb05159h.zip [file c1mb05159h.zip]

**Mascot Search Results****Peptide View**MS/MS Fragmentation of **RPVYYVQSPSR**

Found in **AT1G45688.2**, | Symbols: | similar to unknown protein [Arabidopsis thaliana] (TAIR:AT5G42860.1); similar to H0814G11.12 [Oryza sativa (indica cultivar-group)] (GB:CAJ86345.1); similar to CAA30379.1 protein [Oryza sativa] (GB:CAB53482.1) | chr1:17193942-17194904

Match to Query 2: 1430.668434 from(716.341493,2+)

Title: PR170\_%\_Salt.3216.3216.2.dta

Data file C:\Users\CooperB\Desktop\Ray\mgfs\MS2special.txt

Click mouse within plot area to zoom in by factor of two about that point

Or, Plot from 200 to 1500 Da Full range

Label all possible matches ☐ Label matches used for scoring ☒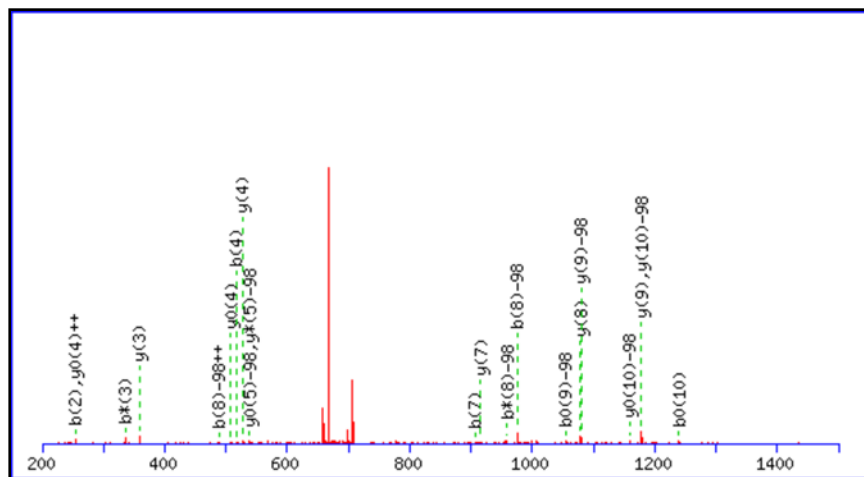

Monoisotopic mass of neutral peptide Mr(calc): 1430.6707

Fixed modifications: Carbamidomethyl (C) (apply to specified residues or termini only)

Variable modifications:

S8 : Phospho (ST), with neutral losses 97.9769(shown in table), 0.0000

Ions Score: 24 Expect: 0.11

Matches : 22/164 fragment ions using 33 most intense peaks ([help](#))

| #  | b         | b <sup>++</sup> | b <sup>*</sup> | b <sup>*++</sup> | b <sup>0</sup> | b <sup>0++</sup> | Seq. | y         | y <sup>++</sup> | y <sup>*</sup> | y <sup>*++</sup> | y <sup>0</sup> | y <sup>0++</sup> | #  |
|----|-----------|-----------------|----------------|------------------|----------------|------------------|------|-----------|-----------------|----------------|------------------|----------------|------------------|----|
| 1  | 157.1084  | 79.0578         | 140.0818       | 70.5446          |                |                  | R    |           |                 |                |                  |                |                  | 11 |
| 2  | 254.1612  | 127.5842        | 237.1346       | 119.0709         |                |                  | P    | 1177.6000 | 589.3037        | 1160.5735      | 580.7904         | 1159.5895      | 580.2984         | 10 |
| 3  | 353.2296  | 177.1184        | 336.2030       | 168.6051         |                |                  | V    | 1080.5473 | 540.7773        | 1063.5207      | 532.2640         | 1062.5367      | 531.7720         | 9  |
| 4  | 516.2929  | 258.6501        | 499.2663       | 250.1368         |                |                  | Y    | 981.4789  | 491.2431        | 964.4523       | 482.7298         | 963.4683       | 482.2378         | 8  |
| 5  | 679.3562  | 340.1817        | 662.3297       | 331.6685         |                |                  | Y    | 818.4155  | 409.7114        | 801.3890       | 401.1981         | 800.4050       | 400.7061         | 7  |
| 6  | 778.4246  | 389.7160        | 761.3981       | 381.2027         |                |                  | V    | 655.3522  | 328.1797        | 638.3257       | 319.6665         | 637.3416       | 319.1745         | 6  |
| 7  | 906.4832  | 453.7452        | 889.4567       | 445.2320         |                |                  | Q    | 556.2838  | 278.6455        | 539.2572       | 270.1323         | 538.2732       | 269.6402         | 5  |
| 8  | 975.5047  | 488.2560        | 958.4781       | 479.7427         | 957.4941       | 479.2507         | S    | 428.2252  | 214.6162        | 411.1987       | 206.1030         | 410.2146       | 205.6110         | 4  |
| 9  | 1072.5574 | 536.7824        | 1055.5309      | 528.2691         | 1054.5469      | 527.7771         | P    | 359.2037  | 180.1055        | 342.1772       | 171.5922         | 341.1932       | 171.1002         | 3  |
| 10 | 1159.5895 | 580.2984        | 1142.5629      | 571.7851         | 1141.5789      | 571.2931         | S    | 262.1510  | 131.5791        | 245.1244       | 123.0659         | 244.1404       | 122.5738         | 2  |
| 11 |           |                 |                |                  |                |                  | R    | 175.1190  | 88.0631         | 158.0924       | 79.5498          |                |                  | 1  |

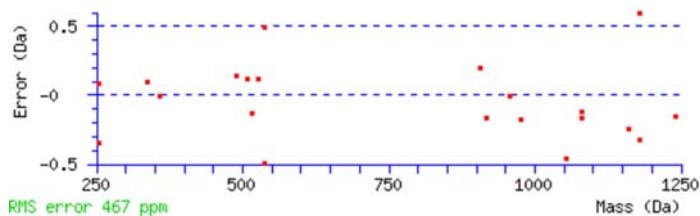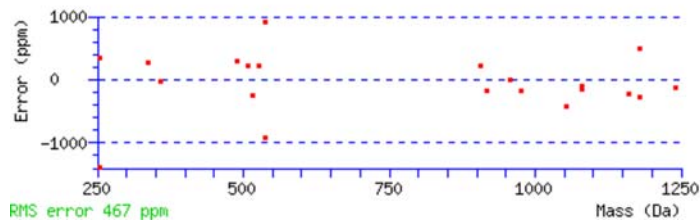

NCBI BLAST search of [RPVYYVQSPSR](#)

(Parameters: blastp, nr protein database, expect=20000, no filter, PAM30)

Other BLAST [web gateways](#)

All matches to this query

| Score | Mr(calc): | Delta   | Sequence                       |
|-------|-----------|---------|--------------------------------|
| 24.5  | 1430.6707 | -0.0023 | <a href="#">RPVYYVQSPSR</a>    |
| 17.5  | 1430.6707 | -0.0023 | <a href="#">RPVYYVQSPSR</a>    |
| 9.7   | 1429.6755 | 0.9929  | <a href="#">WLGSKTIFENR</a>    |
| 7.8   | 1429.6710 | 0.9974  | <a href="#">QVLMMEIVSLR</a>    |
| 7.5   | 1430.6752 | -0.0067 | <a href="#">EFTFVMEAQVSK</a>   |
| 3.5   | 1430.6595 | 0.0089  | <a href="#">LTGGVPNYFVER</a>   |
| 3.4   | 1429.6548 | 1.0136  | <a href="#">FSAMAGAGVDDFVK</a> |
| 2.8   | 1430.6568 | 0.0116  | <a href="#">WASNQHSRLPR</a>    |
| 2.7   | 1430.6629 | 0.0055  | <a href="#">LAGVDKTCNFVK</a>   |
| 2.7   | 1429.6626 | 1.0058  | <a href="#">YFDIGAAAAGGFDR</a> |

-98 neutral loss, S8 -18  
-98 neutral loss, S10 -18

MS2: top score of 24.5, match probability of 90%; +2 charge, b ion found for S8 [-18], supported by MS3. moderate position confidence because of match probability.

Mascot: <http://www.matrixscience.com/>

# Mascot Search Results

## Peptide View

MS/MS Fragmentation of **RPVYYVQSPSR**

Found in **AT1G45688.1**, | Symbols: | similar to unknown protein [Arabidopsis thaliana] (TAIR:AT5G42860.1); similar to H0814G11.12 [Oryza sativa (indica cultivar-group)] (GB:CAJ86345.1); similar to CAA30379.1 protein [Oryza sativa] (GB:CAB53482.1) | chr1:17193942-17195310

Match to Query 1: 1332.970724 from(667.492638,2+)

Title: PR170\_%\_Salt.3217.3217.2.dta

Data file C:\Users\CooperB\Desktop\Ray\mgfs\MS3special.txt

Click mouse within plot area to zoom in by factor of two about that point

Or,  200 to 1300 Da

Label all possible matches ☐ Label matches used for scoring ☒

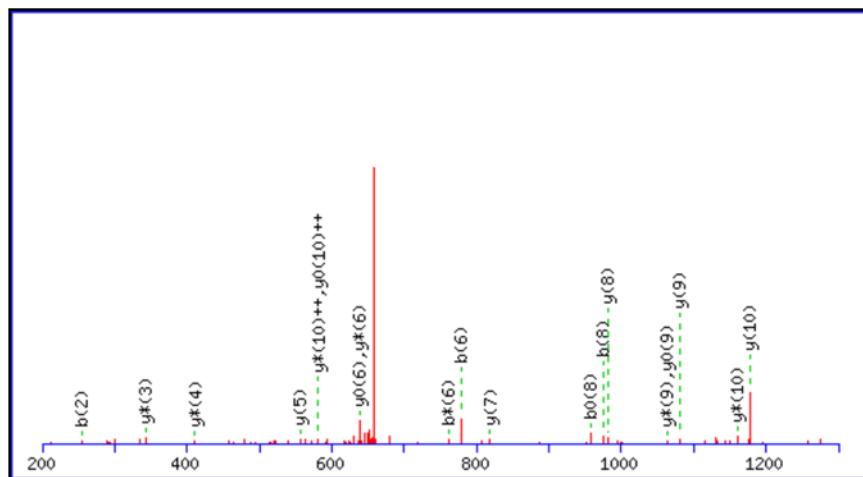

Monoisotopic mass of neutral peptide **Mr(calc):** 1332.6939

**Fixed modifications:** Carbamidomethyl (C) (apply to specified residues or termini only)

**Variable modifications:**

S8 : Dehydrated (S)

**Ions Score:** 24 **Expect:** 5.5

**Matches :** 20/104 fragment ions using 31 most intense peaks ([help](#))

| #  | b               | b <sup>++</sup> | b*              | b <sup>*++</sup> | b <sup>0</sup>  | b <sup>0++</sup> | Seq. | y                | y <sup>++</sup> | y*               | y <sup>*++</sup> | y <sup>0</sup>   | y <sup>0++</sup> | #  |
|----|-----------------|-----------------|-----------------|------------------|-----------------|------------------|------|------------------|-----------------|------------------|------------------|------------------|------------------|----|
| 1  | 157.1084        | 79.0578         | 140.0818        | 70.5446          |                 |                  | R    |                  |                 |                  |                  |                  |                  | 11 |
| 2  | <b>254.1612</b> | 127.5842        | 237.1346        | 119.0709         |                 |                  | P    | <b>1177.6000</b> | 589.3037        | <b>1160.5735</b> | <b>580.7904</b>  | 1159.5895        | <b>580.2984</b>  | 10 |
| 3  | 353.2296        | 177.1184        | 336.2030        | 168.6051         |                 |                  | V    | <b>1080.5473</b> | 540.7773        | <b>1063.5207</b> | 532.2640         | <b>1062.5367</b> | 531.7720         | 9  |
| 4  | 516.2929        | 258.6501        | 499.2663        | 250.1368         |                 |                  | Y    | <b>981.4789</b>  | 491.2431        | 964.4523         | 482.7298         | 963.4683         | 482.2378         | 8  |
| 5  | 679.3562        | 340.1817        | 662.3297        | 331.6685         |                 |                  | Y    | <b>818.4155</b>  | 409.7114        | 801.3890         | 401.1981         | 800.4050         | 400.7061         | 7  |
| 6  | <b>778.4246</b> | 389.7160        | <b>761.3981</b> | 381.2027         |                 |                  | V    | 655.3522         | 328.1797        | <b>638.3256</b>  | 319.6665         | <b>637.3416</b>  | 319.1745         | 6  |
| 7  | 906.4832        | 453.7452        | 889.4567        | 445.2320         |                 |                  | Q    | <b>556.2838</b>  | 278.6455        | 539.2572         | 270.1323         | 538.2732         | 269.6402         | 5  |
| 8  | <b>975.5047</b> | 488.2560        | 958.4781        | 479.7427         | <b>957.4941</b> | 479.2507         | S    | 428.2252         | 214.6162        | <b>411.1987</b>  | 206.1030         | 410.2146         | 205.6110         | 4  |
| 9  | 1072.5574       | 536.7824        | 1055.5309       | 528.2691         | 1054.5469       | 527.7771         | P    | 359.2037         | 180.1055        | <b>342.1772</b>  | 171.5922         | 341.1932         | 171.1002         | 3  |
| 10 | 1159.5895       | <b>580.2984</b> | 1142.5629       | 571.7851         | 1141.5789       | 571.2931         | S    | 262.1510         | 131.5791        | 245.1244         | 123.0659         | 244.1404         | 122.5738         | 2  |
| 11 |                 |                 |                 |                  |                 |                  | R    | 175.1190         | 88.0631         | 158.0924         | 79.5498          |                  |                  | 1  |

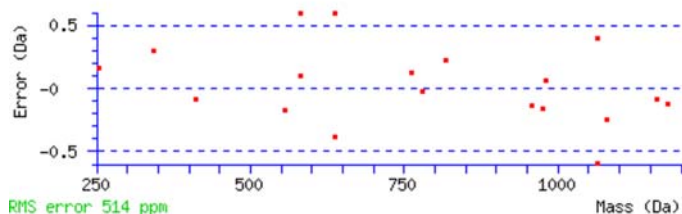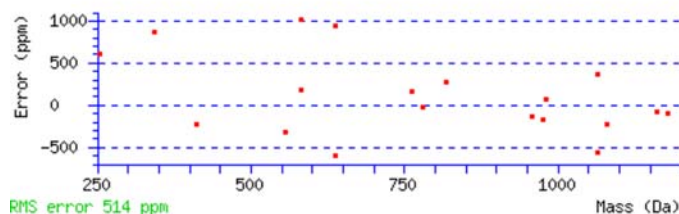

NCBI BLAST search of [RPVYYVQSPSR](#)

(Parameters: blastp, nr protein database, expect=20000, no filter, PAM30)

Other BLAST [web gateways](#)

All matches to this query

| Score | Mr(calc): | Delta   | Sequence                      |
|-------|-----------|---------|-------------------------------|
| 23.7  | 1332.6939 | 0.2768  | <a href="#">RPVYYVQSPSR</a>   |
| 20.1  | 1332.6939 | 0.2768  | <a href="#">RPVYYVQSPSR</a>   |
| 19.7  | 1333.5412 | -0.5705 | <a href="#">GQSETQNSKSSR</a>  |
| 19.7  | 1333.5412 | -0.5705 | <a href="#">GQSETQNSKSSR</a>  |
| 18.7  | 1333.5123 | -0.5416 | <a href="#">SLSSPTSACSSSR</a> |
| 18.7  | 1333.5123 | -0.5416 | <a href="#">SLSSPTSACSSSR</a> |
| 18.7  | 1333.5123 | -0.5416 | <a href="#">SLSSPTSACSSSR</a> |
| 18.7  | 1333.5123 | -0.5416 | <a href="#">SLSSPTSACSSSR</a> |
| 18.7  | 1333.5123 | -0.5416 | <a href="#">SLSSPTSACSSSR</a> |
| 18.7  | 1333.5123 | -0.5416 | <a href="#">SLSSPTSACSSSR</a> |
| 18.7  | 1333.5123 | -0.5416 | <a href="#">SLSSPTSACSSSR</a> |

S8 -18  
S10 -18

MS3: -98 Da  
triggered  
consecutive  
spectrum with  
corroborating ions.  
b ion found for S8  
[-18].

Mascot: <http://www.matrixscience.com/>
