# Supplementary material for: Proteomic responses in Arabidopsis thaliana seedlings treated with ethylene
Source: Royal Society of Chemistry journal article supplement (doi:10.1039/c1mb05159h), 2011-06-29
Supplement: c1mb05159h.zip [file c1mb05159h.zip]

**Mascot Search Results****Peptide View**MS/MS Fragmentation of **GMDSQMTSSLYDSLK**Found in **AT5G03280.1**, | Symbols: EIN2, PIR2, CKR1, ERA3, ORE3, ORE2 | EIN2 (ETHYLENE INSENSITIVE 2); transporter | chr5:788588-793065 FORWARD

Match to Query 12: 2078.573724 from(693.865184,3+)

Title: PR240\_%\_Salt.6140.6140.3.dta

Data file C:\Users\CooperB\Desktop\Ray\mgfs\MS2special.txt

Click mouse within plot area to zoom in by factor of two about that point

Or, Plot from 200 to 950 Da Full range

Label all possible matches ☐ Label matches used for scoring ☒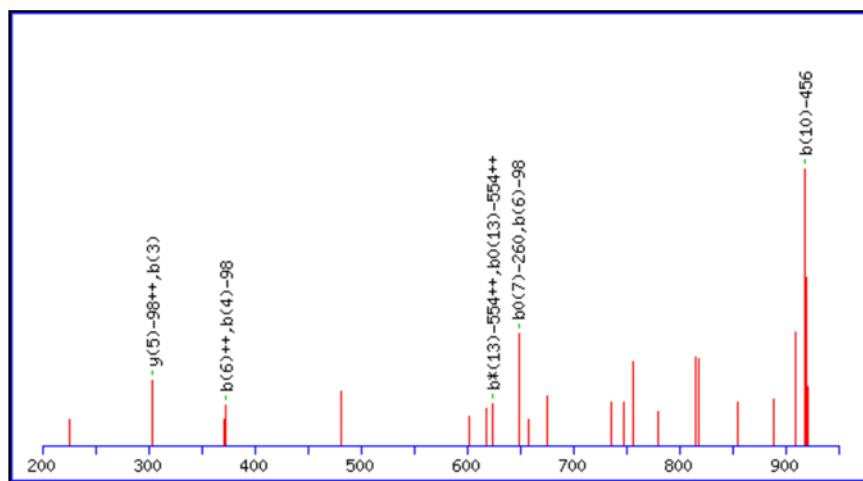

Monoisotopic mass of neutral peptide Mr(calc): 2077.5542

Fixed modifications: Carbamidomethyl (C) (apply to specified residues or termini only)

Variable modifications:

S4 : Phospho (ST), with neutral losses 97.9769(shown in table), 0.0000

M6 : Oxidation (M), with neutral losses 63.9983(shown in table), 0.0000

T7 : Phospho (ST), with neutral losses 97.9769(shown in table), 0.0000

S8 : Phospho (ST), with neutral losses 97.9769(shown in table), 0.0000

S9 : Phospho (ST), with neutral losses 97.9769(shown in table), 0.0000

S13 : Phospho (ST), with neutral losses 97.9769(shown in table), 0.0000

Ions Score: 14 Expect: 0.046

Matches : 9/456 fragment ions using 7 most intense peaks ([help](#))

| #  | b         | b <sup>++</sup> | b <sup>*</sup> | b <sup>*++</sup> | b <sup>0</sup> | b <sup>0++</sup> | Seq. | y         | y <sup>++</sup> | y <sup>*</sup> | y <sup>*++</sup> | y <sup>0</sup> | y <sup>0++</sup> | #  |
|----|-----------|-----------------|----------------|------------------|----------------|------------------|------|-----------|-----------------|----------------|------------------|----------------|------------------|----|
| 1  | 58.0287   | 29.5180         |                |                  |                |                  | G    |           |                 |                |                  |                |                  | 15 |
| 2  | 189.0692  | 95.0383         |                |                  |                |                  | M    | 1467.6573 | 734.3323        | 1450.6307      | 725.8190         | 1449.6467      | 725.3270         | 14 |
| 3  | 304.0962  | 152.5517        |                |                  | 286.0856       | 143.5464         | D    | 1336.6168 | 668.8120        | 1319.5903      | 660.2988         | 1318.6062      | 659.8068         | 13 |
| 4  | 373.1176  | 187.0625        |                |                  | 355.1071       | 178.0572         | S    | 1221.5899 | 611.2986        | 1204.5633      | 602.7853         | 1203.5793      | 602.2933         | 12 |
| 5  | 501.1762  | 251.0917        | 484.1497       | 242.5785         | 483.1656       | 242.0865         | Q    | 1152.5684 | 576.7878        | 1135.5419      | 568.2746         | 1134.5578      | 567.7826         | 11 |
| 6  | 584.2133  | 292.6103        | 567.1868       | 284.0970         | 566.2028       | 283.6050         | M    | 1024.5098 | 512.7585        | 1007.4833      | 504.2453         | 1006.4993      | 503.7533         | 10 |
| 7  | 667.2504  | 334.1289        | 650.2239       | 325.6156         | 649.2399       | 325.1236         | T    | 941.4727  | 471.2400        | 924.4462       | 462.7267         | 923.4621       | 462.2347         | 9  |
| 8  | 736.2719  | 368.6396        | 719.2454       | 360.1263         | 718.2613       | 359.6343         | S    | 858.4356  | 429.7214        | 841.4090       | 421.2082         | 840.4250       | 420.7162         | 8  |
| 9  | 805.2934  | 403.1503        | 788.2668       | 394.6370         | 787.2828       | 394.1450         | S    | 789.4141  | 395.2107        | 772.3876       | 386.6974         | 771.4036       | 386.2054         | 7  |
| 10 | 918.3774  | 459.6924        | 901.3509       | 451.1791         | 900.3669       | 450.6871         | L    | 720.3927  | 360.7000        | 703.3661       | 352.1867         | 702.3821       | 351.6947         | 6  |
| 11 | 1081.4408 | 541.2240        | 1064.4142      | 532.7107         | 1063.4302      | 532.2187         | Y    | 607.3086  | 304.1579        | 590.2821       | 295.6447         | 589.2980       | 295.1527         | 5  |
| 12 | 1196.4677 | 598.7375        | 1179.4412      | 590.2242         | 1178.4571      | 589.7322         | D    | 444.2453  | 222.6263        | 427.2187       | 214.1130         | 426.2347       | 213.6210         | 4  |
| 13 | 1265.4892 | 633.2482        | 1248.4626      | 624.7349         | 1247.4786      | 624.2429         | S    | 329.2183  | 165.1128        | 312.1918       | 156.5995         | 311.2078       | 156.1075         | 3  |
| 14 | 1378.5732 | 689.7903        | 1361.5467      | 681.2770         | 1360.5627      | 680.7850         | L    | 260.1969  | 130.6021        | 243.1703       | 122.0888         |                |                  | 2  |
| 15 |           |                 |                |                  |                |                  | K    | 147.1128  | 74.0600         | 130.0863       | 65.5468          |                |                  | 1  |

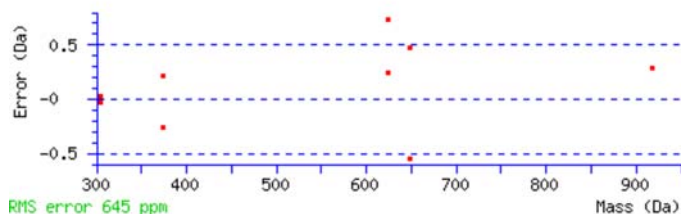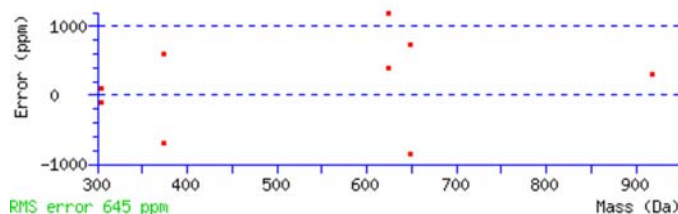

NCBI BLAST search of [GMDSQMTSSLYDSLK](#)

(Parameters: blastp, nr protein database, expect=20000, no filter, PAM30)

Other BLAST [web gateways](#)

All matches to this query

| Score | Mr(calc): | Delta  | Sequence                          |
|-------|-----------|--------|-----------------------------------|
| 14.2  | 2077.5542 | 1.0195 | <a href="#">GMDSQMTSSLYDSLK</a>   |
| 10.3  | 2078.5623 | 0.0114 | <a href="#">MTTMIASSTLSPSR</a>    |
| 10.3  | 2078.5623 | 0.0114 | <a href="#">MTTMIASSTLSPSR</a>    |
| 4.8   | 2078.5623 | 0.0114 | <a href="#">MTTMIASSTLSPSR</a>    |
| 4.8   | 2078.5623 | 0.0114 | <a href="#">MTTMIASSTLSPSR</a>    |
| 4.8   | 2077.5676 | 1.0062 | <a href="#">ASSNTTIGVDNTERK</a>   |
| 0.9   | 2077.5598 | 1.0139 | <a href="#">SGSCSCSGNISASDVDR</a> |

neutral loss -98, S4, T7, S8, S9 -18

MS2: Match probability 95% but top score of 14.2 is low. +3 charge; S4 [-18] ion found but others deduced. Multiply phosphorylated peptides ionize poorly. Moderate confidence for site positioning.

Mascot: <http://www.matrixscience.com/>
