# Supplementary material for: Proteomic responses in Arabidopsis thaliana seedlings treated with ethylene
Source: Royal Society of Chemistry journal article supplement (doi:10.1039/c1mb05159h), 2011-06-29
Supplement: c1mb05159h.zip [file c1mb05159h.zip]

**Mascot Search Results****Peptide View**MS/MS Fragmentation of **MSGQESHDISSGGEQAGVDHPPPR**Found in **AT5G64330.1** | Symbols: JK218, RPT3, NPH3 | NPH3 (NON-PHOTOTROPIC HYPOCOTYL 3); signal transducer | chr5:25744794-25747451 FORWARD

Match to Query 16: 2554.046724 from(852.356184,3+)

Title: PR1100\_%\_Salt.2789.2789.3.dta

Data file C:\Users\CooperB\Desktop\Rav\mgfs\MS2special.txt

Click mouse within plot area to zoom in by factor of two about that point

Or,  200  1700  Label all possible matches ☐ Label matches used for scoring ☒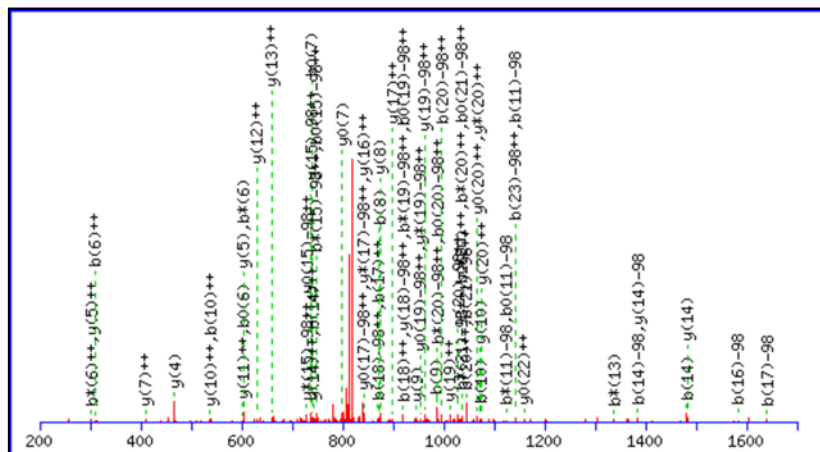

|    |           |           |           |           |           |           |   |          |          |          |          |  |  |   |
|----|-----------|-----------|-----------|-----------|-----------|-----------|---|----------|----------|----------|----------|--|--|---|
| 22 | 2185.9203 | 1093.4638 | 2168.8938 | 1084.9505 | 2167.9098 | 1084.4585 | P | 369.2245 | 185.1159 | 352.1979 | 176.6026 |  |  | 3 |
| 23 | 2282.9731 | 1141.9902 | 2265.9466 | 1133.4769 | 2264.9625 | 1132.9849 | P | 272.1717 | 136.5895 | 255.1452 | 128.0762 |  |  | 2 |
| 24 |           |           |           |           |           |           | R | 175.1190 | 88.0631  | 158.0924 | 79.5498  |  |  | 1 |

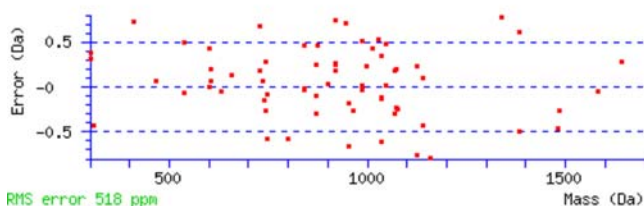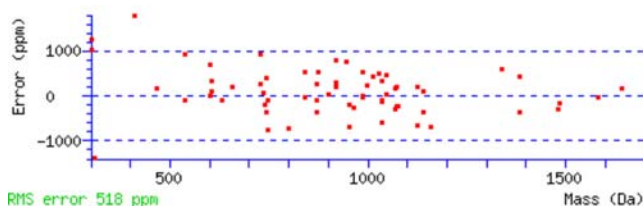

NCBI **BLAST** search of [MSGQESHDISSGGEQAGVDHPPPR](#)

(Parameters: blastp, nr protein database, expect=20000, no filter, PAM30)

Other BLAST [web gateways](#)

#### All matches to this query

| Score | Mr(calc): | Delta   | Sequence                                 |
|-------|-----------|---------|------------------------------------------|
| 36.3  | 2554.0544 | -0.0077 | <a href="#">MSGQESHDISSGGEQAGVDHPPPR</a> |
| 30.5  | 2554.0544 | -0.0077 | <a href="#">MSGQESHDISSGGEQAGVDHPPPR</a> |
| 22.3  | 2554.0544 | -0.0077 | <a href="#">MSGQESHDISSGGEQAGVDHPPPR</a> |
| 17.6  | 2553.0564 | 0.9903  | <a href="#">RGSGNSTAPTSRPVPASQPFGR</a>   |
| 16.8  | 2554.0544 | -0.0077 | <a href="#">MSGQESHDISSGGEQAGVDHPPPR</a> |
| 11.4  | 2553.0564 | 0.9903  | <a href="#">RGSGNSTAPTSRPVPASQPFGR</a>   |
| 7.6   | 2553.0522 | 0.9945  | <a href="#">ISPERPMRGHGFYGEHQHR</a>      |
| 7.1   | 2554.0293 | 0.0174  | <a href="#">GYFVEPAIVSNVTTSMEIWR</a>     |
| 7.1   | 2554.0293 | 0.0174  | <a href="#">GYFVEPAIVSNVTTSMEIWR</a>     |
| 7.0   | 2553.0190 | 1.0277  | <a href="#">TELAETTTVGSSSSSASSMSKR</a>   |

-98 neutral loss, S11 -18

-98 neutral loss, S10 -18

-98 neutral loss, S6 -18

MS2: Top score of 36.3, match probability greater than 99%. +3 charge and b and y ions for S11 [-18], supported by MS3. High position confidence.

Mascot: <http://www.matrixscience.com/>

Mascot Search Results

Peptide View

MS/MS Fragmentation of MSGQESHDISSGGEQAGVDHPPPR  
Found in AT5G64330.1 | Symbols: JK218, RPT3, NPH3 | NPH3 (NON-PHOTOTROPIC HYPOCOTYL 3); signal transducer |  
chr5:25744794-25747451 FORWARD

Match to Query 6: 2456.342724 from(819.788184,3+)  
Title: PR1100\_%.Salt.2790.2790.3.dta  
Data file C:\Users\CooperB\Desktop\Ray\mgfs\MS3special.txt

Click mouse within plot area to zoom in by factor of two about that point  
Or, Plot from 300 to 1500 Da Full range  
Label all possible matches Label matches used for scoring

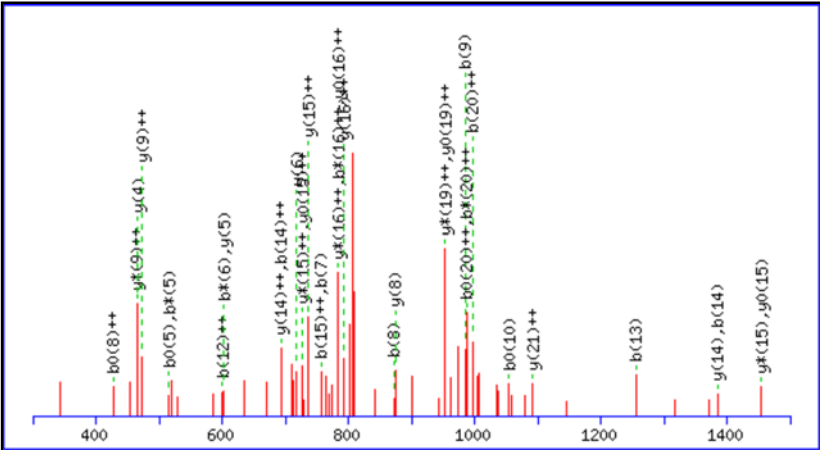

Monoisotopic mass of neutral peptide Mr(calc): 2456.0775  
Fixed modifications: Carbamidomethyl (C) (apply to specified residues or termini only)  
Variable modifications:  
S11 : Dehydrated (S)  
Ions Score: 25 Expect: 8.6  
Matches : 36/258 fragment ions using 48 most intense peaks (help)

| #  | b         | b <sup>++</sup> | b <sup>*</sup> | b <sup>*++</sup> | b <sup>0</sup> | b <sup>0++</sup> | Seq. | y         | y <sup>++</sup> | y <sup>*</sup> | y <sup>*++</sup> | y <sup>0</sup> | y <sup>0++</sup> | #  |
|----|-----------|-----------------|----------------|------------------|----------------|------------------|------|-----------|-----------------|----------------|------------------|----------------|------------------|----|
| 1  | 132.0478  | 66.5275         |                |                  |                |                  | M    |           |                 |                |                  |                |                  | 24 |
| 2  | 219.0798  | 110.0435        |                |                  | 201.0692       | 101.0382         | S    | 2326.0443 | 1163.5258       | 2309.0177      | 1155.0125        | 2308.0337      | 1154.5205        | 23 |
| 3  | 276.1013  | 138.5543        |                |                  | 258.0907       | 129.5490         | G    | 2239.0123 | 1120.0098       | 2221.9857      | 1111.4965        | 2221.0017      | 1111.0045        | 22 |
| 4  | 404.1598  | 202.5836        | 387.1333       | 194.0703         | 386.1493       | 193.5783         | Q    | 2181.9908 | 1091.4990       | 2164.9642      | 1082.9858        | 2163.9802      | 1082.4938        | 21 |
| 5  | 533.2024  | 267.1049        | 516.1759       | 258.5916         | 515.1919       | 258.0996         | E    | 2053.9322 | 1027.4697       | 2036.9057      | 1018.9565        | 2035.9217      | 1018.4645        | 20 |
| 6  | 620.2345  | 310.6209        | 603.2079       | 302.1076         | 602.2239       | 301.6156         | S    | 1924.8896 | 962.9485        | 1907.8631      | 954.4352         | 1906.8791      | 953.9432         | 19 |
| 7  | 757.2934  | 379.1503        | 740.2668       | 370.6370         | 739.2828       | 370.1450         | H    | 1837.8576 | 919.4324        | 1820.8311      | 910.9192         | 1819.8470      | 910.4272         | 18 |
| 8  | 872.3203  | 436.6638        | 855.2938       | 428.1505         | 854.3097       | 427.6585         | D    | 1700.7987 | 850.9030        | 1683.7721      | 842.3897         | 1682.7881      | 841.8977         | 17 |
| 9  | 985.4044  | 493.2058        | 968.3778       | 484.6925         | 967.3938       | 484.2005         | I    | 1585.7717 | 793.3895        | 1568.7452      | 784.8762         | 1567.7612      | 784.3842         | 16 |
| 10 | 1072.4364 | 536.7218        | 1055.4099      | 528.2086         | 1054.4258      | 527.7166         | S    | 1472.6877 | 736.8475        | 1455.6611      | 728.3342         | 1454.6771      | 727.8422         | 15 |
| 11 | 1141.4579 | 571.2326        | 1124.4313      | 562.7193         | 1123.4473      | 562.2273         | S    | 1385.6557 | 693.3315        | 1368.6291      | 684.8182         | 1367.6451      | 684.3262         | 14 |
| 12 | 1198.4793 | 599.7433        | 1181.4528      | 591.2300         | 1180.4688      | 590.7380         | G    | 1316.6342 | 658.8207        | 1299.6076      | 650.3075         | 1298.6236      | 649.8155         | 13 |
| 13 | 1255.5008 | 628.2540        | 1238.4742      | 619.7408         | 1237.4902      | 619.2488         | G    | 1259.6127 | 630.3100        | 1242.5862      | 621.7967         | 1241.6022      | 621.3047         | 12 |
| 14 | 1384.5434 | 692.7753        | 1367.5168      | 684.2621         | 1366.5328      | 683.7700         | E    | 1202.5913 | 601.7993        | 1185.5647      | 593.2860         | 1184.5807      | 592.7940         | 11 |
| 15 | 1512.6020 | 756.8046        | 1495.5754      | 748.2913         | 1494.5914      | 747.7993         | Q    | 1073.5487 | 537.2780        | 1056.5221      | 528.7647         | 1055.5381      | 528.2727         | 10 |
| 16 | 1583.6391 | 792.3232        | 1566.6125      | 783.8099         | 1565.6285      | 783.3179         | A    | 945.4901  | 473.2487        | 928.4635       | 464.7354         | 927.4795       | 464.2434         | 9  |
| 17 | 1640.6605 | 820.8339        | 1623.6340      | 812.3206         | 1622.6500      | 811.8286         | G    | 874.4530  | 437.7301        | 857.4264       | 429.2169         | 856.4424       | 428.7248         | 8  |
| 18 | 1739.7290 | 870.3681        | 1722.7024      | 861.8548         | 1721.7184      | 861.3628         | V    | 817.4315  | 409.2194        | 800.4050       | 400.7061         | 799.4209       | 400.2141         | 7  |
| 19 | 1854.7559 | 927.8816        | 1837.7293      | 919.3683         | 1836.7453      | 918.8763         | D    | 718.3631  | 359.6852        | 701.3365       | 351.1719         | 700.3525       | 350.6799         | 6  |
| 20 | 1991.8148 | 996.4110        | 1974.7883      | 987.8978         | 1973.8042      | 987.4058         | H    | 603.3362  | 302.1717        | 586.3096       | 293.6584         |                |                  | 5  |
| 21 | 2088.8676 | 1044.9374       | 2071.8410      | 1036.4241        | 2070.8570      | 1035.9321        | P    | 466.2772  | 233.6423        | 449.2507       | 225.1290         |                |                  | 4  |

|    |           |           |           |           |           |           |   |          |          |          |          |  |  |   |
|----|-----------|-----------|-----------|-----------|-----------|-----------|---|----------|----------|----------|----------|--|--|---|
| 22 | 2185.9203 | 1093.4638 | 2168.8938 | 1084.9505 | 2167.9098 | 1084.4585 | P | 369.2245 | 185.1159 | 352.1979 | 176.6026 |  |  | 3 |
| 23 | 2282.9731 | 1141.9902 | 2265.9466 | 1133.4769 | 2264.9625 | 1132.9849 | P | 272.1717 | 136.5895 | 255.1452 | 128.0762 |  |  | 2 |
| 24 |           |           |           |           |           |           | R | 175.1190 | 88.0631  | 158.0924 | 79.5498  |  |  | 1 |

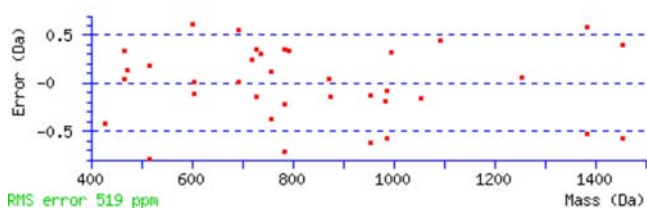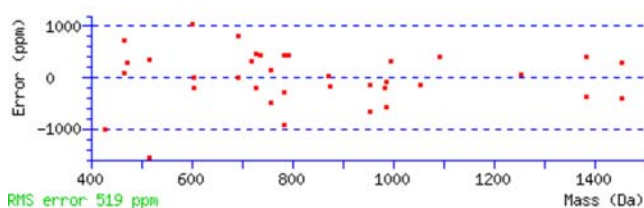

NCBI **BLAST** search of [MSGQESHDISSGGEQAGVDHPPPR](#)

(Parameters: blastp, nr protein database, expect=20000, no filter, PAM30)

Other BLAST [web gateways](#)

All matches to this query

| Score | Mr(calc): | Delta  | Sequence                                 |
|-------|-----------|--------|------------------------------------------|
| 26.6  | 2455.0742 | 1.2685 | <a href="#">SSSTPTSTVYNSGGVTGSRMSITR</a> |
| 26.6  | 2455.0742 | 1.2685 | <a href="#">SSSTPTSTVYNSGGVTGSRMSITR</a> |
| 26.5  | 2456.0775 | 0.2652 | <a href="#">MSGQESHDISSGGEQAGVDHPPPR</a> |
| 24.6  | 2456.0775 | 0.2652 | <a href="#">MSGQESHDISSGGEQAGVDHPPPR</a> |
| 21.0  | 2455.0742 | 1.2685 | <a href="#">SSSTPTSTVYNSGGVTGSRMSITR</a> |
| 21.0  | 2455.0742 | 1.2685 | <a href="#">SSSTPTSTVYNSGGVTGSRMSITR</a> |
| 20.7  | 2455.0742 | 1.2685 | <a href="#">SSSTPTSTVYNSGGVTGSRMSITR</a> |
| 20.7  | 2455.0742 | 1.2685 | <a href="#">SSSTPTSTVYNSGGVTGSRMSITR</a> |
| 20.7  | 2455.0742 | 1.2685 | <a href="#">SSSTPTSTVYNSGGVTGSRMSITR</a> |
| 20.7  | 2455.0742 | 1.2685 | <a href="#">SSSTPTSTVYNSGGVTGSRMSITR</a> |

S11 -18

MS3: -98 Da triggered consecutive spectrum with corroborating ions for MS2. This is 3rd ranked match but first two have big mass delta. y ion found for S11 [-18]

Mascot: <http://www.matrixscience.com/>
