# Supplementary material for: Proteomic responses in Arabidopsis thaliana seedlings treated with ethylene
Source: Royal Society of Chemistry journal article supplement (doi:10.1039/c1mb05159h), 2011-06-29
Supplement: c1mb05159h.zip [file c1mb05159h.zip]

# **Mascot Search Results**

## Peptide View

MS/MS Fragmentation of **IHFMLSSYAPVISA**AK

Found in **AT5G19770.1**, | Symbols: TUA3 | TUA3 (tubulin alpha-3) | chr5:6682763-6684476 REVERSE

Match to Query 12: 1813.900484 from(907.957518,2+)

Title: FR190\_%\_Salt\_two.9639.9639.2.dta

Data file C:\Users\CooperB\Desktop\Ray\mgfs\MS2special.txt

Click mouse within plot area to zoom in by factor of two about that point

Or,  200 to 1800 Da

Label all possible matches ☐ Label matches used for scoring ☒

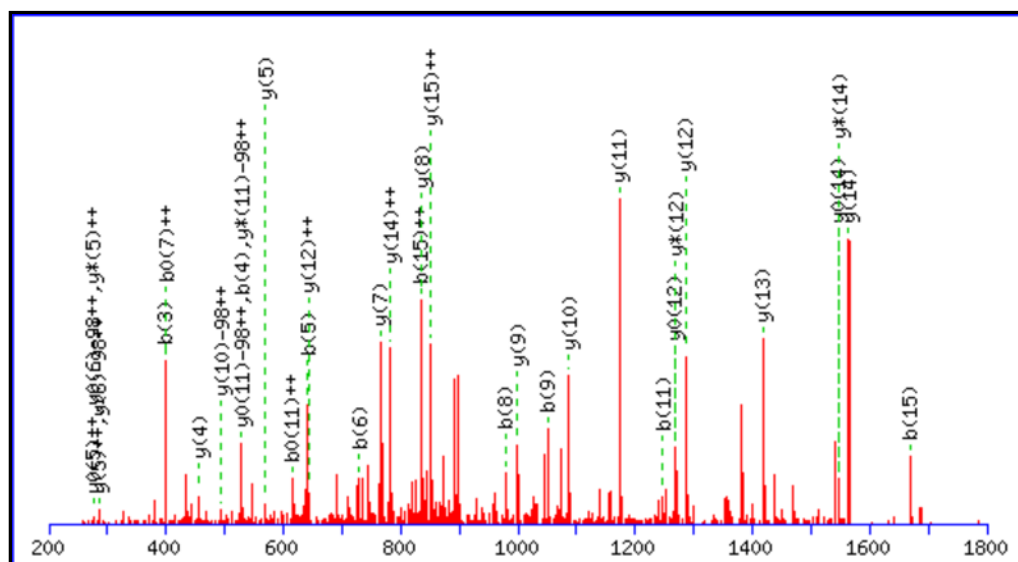

Monoisotopic mass of neutral peptide Mr(calc): 1813.8838

Fixed modifications: Carbamidomethyl (C) (apply to specified residues or termini only)

Variable modifications:

S13 : Phospho (ST), with neutral losses 0.0000(shown in table), 97.9769

Ions Score: 43 Expect: 0.0015

Matches : 36/218 fragment ions using 76 most intense peaks ([help](#))

| #  | b         | b <sup>++</sup> | b <sup>0</sup> | b <sup>0++</sup> | Seq. | y         | y <sup>++</sup> | y <sup>*</sup> | y <sup>*++</sup> | y <sup>0</sup> | y <sup>0++</sup> | #  |
|----|-----------|-----------------|----------------|------------------|------|-----------|-----------------|----------------|------------------|----------------|------------------|----|
| 1  | 114.0913  | 57.5493         |                |                  | I    |           |                 |                |                  |                |                  | 16 |
| 2  | 251.1503  | 126.0788        |                |                  | H    | 1701.8070 | 851.4071        | 1684.7805      | 842.8939         | 1683.7964      | 842.4019         | 15 |
| 3  | 398.2187  | 199.6130        |                |                  | F    | 1564.7481 | 782.8777        | 1547.7215      | 774.3644         | 1546.7375      | 773.8724         | 14 |
| 4  | 529.2592  | 265.1332        |                |                  | M    | 1417.6797 | 709.3435        | 1400.6531      | 700.8302         | 1399.6691      | 700.3382         | 13 |
| 5  | 642.3432  | 321.6752        |                |                  | L    | 1286.6392 | 643.8232        | 1269.6126      | 635.3100         | 1268.6286      | 634.8180         | 12 |
| 6  | 729.3752  | 365.1913        | 711.3647       | 356.1860         | S    | 1173.5551 | 587.2812        | 1156.5286      | 578.7679         | 1155.5446      | 578.2759         | 11 |
| 7  | 816.4073  | 408.7073        | 798.3967       | 399.7020         | S    | 1086.5231 | 543.7652        | 1069.4966      | 535.2519         | 1068.5125      | 534.7599         | 10 |
| 8  | 979.4706  | 490.2389        | 961.4600       | 481.2337         | Y    | 999.4911  | 500.2492        | 982.4645       | 491.7359         | 981.4805       | 491.2439         | 9  |
| 9  | 1050.5077 | 525.7575        | 1032.4971      | 516.7522         | A    | 836.4277  | 418.7175        | 819.4012       | 410.2042         | 818.4172       | 409.7122         | 8  |
| 10 | 1147.5605 | 574.2839        | 1129.5499      | 565.2786         | P    | 765.3906  | 383.1990        | 748.3641       | 374.6857         | 747.3801       | 374.1937         | 7  |
| 11 | 1246.6289 | 623.8181        | 1228.6183      | 614.8128         | V    | 668.3379  | 334.6726        | 651.3113       | 326.1593         | 650.3273       | 325.6673         | 6  |

|           |                  |                 |           |          |          |                 |                 |          |                 |          |                 |          |
|-----------|------------------|-----------------|-----------|----------|----------|-----------------|-----------------|----------|-----------------|----------|-----------------|----------|
| <b>12</b> | 1359.7130        | 680.3601        | 1341.7024 | 671.3548 | <b>I</b> | <b>569.2695</b> | <b>285.1384</b> | 552.2429 | <b>276.6251</b> | 551.2589 | <b>276.1331</b> | <b>5</b> |
| <b>13</b> | 1526.7113        | 763.8593        | 1508.7008 | 754.8540 | <b>S</b> | <b>456.1854</b> | 228.5963        | 439.1588 | 220.0831        | 438.1748 | 219.5911        | <b>4</b> |
| <b>14</b> | 1597.7484        | 799.3779        | 1579.7379 | 790.3726 | <b>A</b> | 289.1870        | 145.0972        | 272.1605 | 136.5839        |          |                 | <b>3</b> |
| <b>15</b> | <b>1668.7855</b> | <b>834.8964</b> | 1650.7750 | 825.8911 | <b>A</b> | 218.1499        | 109.5786        | 201.1234 | 101.0653        |          |                 | <b>2</b> |
| <b>16</b> |                  |                 |           |          | <b>K</b> | 147.1128        | 74.0600         | 130.0863 | 65.5468         |          |                 | <b>1</b> |

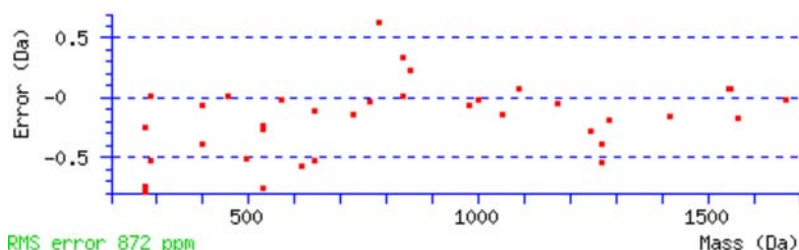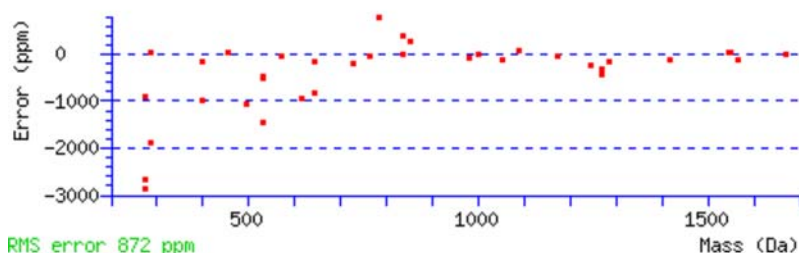

NCBI **BLAST** search of [IHFMLSSYAPVISA AK](#)

(Parameters: blastp, nr protein database, expect=20000, no filter, PAM30)

Other BLAST [web gateways](#)

### All matches to this query

| Score | Mr(calc): | Delta   | Sequence                          |
|-------|-----------|---------|-----------------------------------|
| 42.8  | 1813.8838 | 0.0167  | <a href="#">IHFMLSSYAPVISA AK</a> |
| 24.5  | 1813.8838 | 0.0167  | <a href="#">IHFMLSSYAPVISA AK</a> |
| 16.7  | 1813.8838 | 0.0167  | <a href="#">IHFMLSSYAPVISA AK</a> |
| 4.8   | 1813.8862 | 0.0142  | <a href="#">YDLNTVISAKPKEEK</a>   |
| 4.0   | 1813.8872 | 0.0133  | <a href="#">KFTGKPLPLTCTPMK</a>   |
| 2.5   | 1813.9128 | -0.0123 | <a href="#">GRWTPIFLTTLGLSSAK</a> |
| 2.5   | 1813.9128 | -0.0123 | <a href="#">GRWTPIFLTTLGLSSAK</a> |
| 1.8   | 1813.8862 | 0.0143  | <a href="#">ALAAALEAEELYSKQK</a>  |
| 1.3   | 1813.8862 | 0.0142  | <a href="#">YDLNTVISAKPKEEK</a>   |
| 0.7   | 1813.8872 | 0.0133  | <a href="#">KFTGKPLPLTCTPMK</a>   |

no -98 neutral loss, S13 +80  
no -98 neutral loss, S7 +80  
no -98 neutral loss, S6 +80

MS2: top score of 42.8 and match probability of 99%; +2 charge; y ion found for S13 [+80]. High confidence in positioning.

Mascot: <http://www.matrixscience.com/>
