# Supplementary material for: Proteomic responses in Arabidopsis thaliana seedlings treated with ethylene
Source: Royal Society of Chemistry journal article supplement (doi:10.1039/c1mb05159h), 2011-06-29
Supplement: c1mb05159h.zip [file c1mb05159h.zip]

**Mascot Search Results****Peptide View**MS/MS Fragmentation of **LLEHFLVQEQTGSSPSR**Found in **AT5G64330.1**, | Symbols: JK218, RPT3, NPH3 | NPH3 (NON-PHOTOTROPIC HYPOCOTYL 3); signal transducer | chr5:25744794-25747451 FORWARD

Match to Query 13: 2135.986724 from(1069.000638,2+)

Title: PR180\_%\_Salt.6604.6604.2.dta

Data file C:\Users\CooperB\Desktop\Ray\mgfs\MS2special.txt

Click mouse within plot area to zoom in by factor of two about that point

Or,  300  1700  Label all possible matches ☐ Label matches used for scoring ☒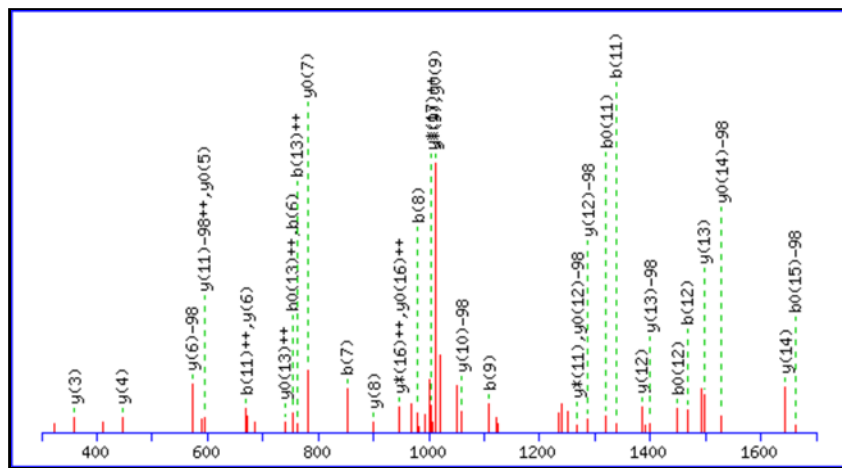

Monoisotopic mass of neutral peptide Mr(calc): 2135.9888

Fixed modifications: Carbamidomethyl (C) (apply to specified residues or termini only)

Variable modifications:

S14 : Phospho (ST), with neutral losses 0.0000(shown in table), 97.9769

Ions Score: 38 Expect: 0.0058

Matches : 35/286 fragment ions using 48 most intense peaks ([help](#))

| #  | b         | b <sup>++</sup> | b <sup>*</sup> | b <sup>*++</sup> | b <sup>0</sup> | b <sup>0++</sup> | Seq. | y         | y <sup>++</sup> | y <sup>*</sup> | y <sup>*++</sup> | y <sup>0</sup> | y <sup>0++</sup> | #  |
|----|-----------|-----------------|----------------|------------------|----------------|------------------|------|-----------|-----------------|----------------|------------------|----------------|------------------|----|
| 1  | 114.0913  | 57.5493         |                |                  |                |                  | L    |           |                 |                |                  |                |                  | 18 |
| 2  | 227.1754  | 114.0913        |                |                  |                |                  | L    | 2023.9121 | 1012.4597       | 2006.8855      | 1003.9464        | 2005.9015      | 1003.4544        | 17 |
| 3  | 356.2180  | 178.6126        |                |                  | 338.2074       | 169.6074         | E    | 1910.8280 | 955.9176        | 1893.8015      | 947.4044         | 1892.8174      | 946.9124         | 16 |
| 4  | 493.2769  | 247.1421        |                |                  | 475.2663       | 238.1368         | H    | 1781.7854 | 891.3963        | 1764.7589      | 882.8831         | 1763.7749      | 882.3911         | 15 |
| 5  | 640.3453  | 320.6763        |                |                  | 622.3348       | 311.6710         | F    | 1644.7265 | 822.8669        | 1627.7000      | 814.3536         | 1626.7159      | 813.8616         | 14 |
| 6  | 753.4294  | 377.2183        |                |                  | 735.4188       | 368.2130         | L    | 1497.6581 | 749.3327        | 1480.6315      | 740.8194         | 1479.6475      | 740.3274         | 13 |
| 7  | 852.4978  | 426.7525        |                |                  | 834.4872       | 417.7473         | V    | 1384.5740 | 692.7907        | 1367.5475      | 684.2774         | 1366.5635      | 683.7854         | 12 |
| 8  | 980.5564  | 490.7818        | 963.5298       | 482.2686         | 962.5458       | 481.7765         | Q    | 1285.5056 | 643.2564        | 1268.4791      | 634.7432         | 1267.4951      | 634.2512         | 11 |
| 9  | 1109.5990 | 555.3031        | 1092.5724      | 546.7898         | 1091.5884      | 546.2978         | E    | 1157.4470 | 579.2272        | 1140.4205      | 570.7139         | 1139.4365      | 570.2219         | 10 |
| 10 | 1237.6576 | 619.3324        | 1220.6310      | 610.8191         | 1219.6470      | 610.3271         | Q    | 1028.4044 | 514.7059        | 1011.3779      | 506.1926         | 1010.3939      | 505.7006         | 9  |
| 11 | 1338.7052 | 669.8563        | 1321.6787      | 661.3430         | 1320.6947      | 660.8510         | T    | 900.3459  | 450.6766        | 883.3193       | 442.1633         | 882.3353       | 441.6713         | 8  |
| 12 | 1467.7478 | 734.3775        | 1450.7213      | 725.8643         | 1449.7373      | 725.3723         | E    | 799.2982  | 400.1527        | 782.2716       | 391.6395         | 781.2876       | 391.1474         | 7  |
| 13 | 1524.7693 | 762.8883        | 1507.7427      | 754.3750         | 1506.7587      | 753.8830         | G    | 670.2556  | 335.6314        | 653.2290       | 327.1182         | 652.2450       | 326.6262         | 6  |
| 14 | 1691.7676 | 846.3875        | 1674.7411      | 837.8742         | 1673.7571      | 837.3822         | S    | 613.2341  | 307.1207        | 596.2076       | 298.6074         | 595.2236       | 298.1154         | 5  |
| 15 | 1778.7997 | 889.9035        | 1761.7731      | 881.3902         | 1760.7891      | 880.8982         | S    | 446.2358  | 223.6215        | 429.2092       | 215.1082         | 428.2252       | 214.6162         | 4  |
| 16 | 1875.8524 | 938.4299        | 1858.8259      | 929.9166         | 1857.8419      | 929.4246         | P    | 359.2037  | 180.1055        | 342.1772       | 171.5922         | 341.1932       | 171.1002         | 3  |
| 17 | 1962.8845 | 981.9459        | 1945.8579      | 973.4326         | 1944.8739      | 972.9406         | S    | 262.1510  | 131.5791        | 245.1244       | 123.0659         | 244.1404       | 122.5738         | 2  |
| 18 |           |                 |                |                  |                |                  | R    | 175.1190  | 88.0631         | 158.0924       | 79.5498          |                |                  | 1  |

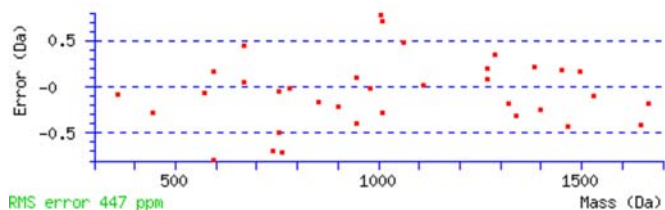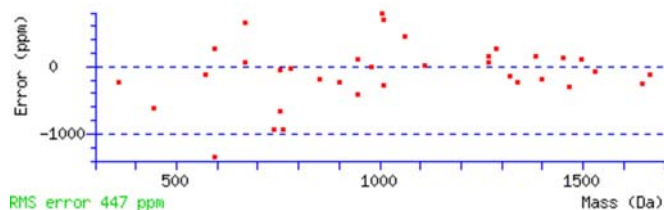

NCBI **BLAST** search of [LLEHFLVQEQTGSSPSR](#)

(Parameters: blastp, nr protein database, expect=20000, no filter, PAM30)

Other BLAST [web gateways](#)

**All matches to this query**

| Score | Mr(calc): | Delta   | Sequence                             |
|-------|-----------|---------|--------------------------------------|
| 37.8  | 2135.9888 | -0.0021 | <a href="#">LLEHFLVQEQTGSSPSR</a>    |
| 31.2  | 2135.9888 | -0.0021 | <a href="#">LLEHFLVQEQTGSSPSR</a>    |
| 27.4  | 2135.9888 | -0.0021 | <a href="#">LLEHFLVQEQTGSSPSR</a>    |
| 26.3  | 2135.9888 | -0.0021 | <a href="#">LLEHFLVQEQTGSSPSR</a>    |
| 7.7   | 2134.9745 | 1.0122  | <a href="#">DYSCESGTLTLLVIDELTK</a>  |
| 4.9   | 2135.9870 | -0.0003 | <a href="#">LFQGVHGRMTDLCRPNR</a>    |
| 2.2   | 2135.9962 | -0.0095 | <a href="#">LKQIQQLFSFADEMSGSK</a>   |
| 2.0   | 2134.9783 | 1.0084  | <a href="#">HEGSSTLVNLEGDAKEELK</a>  |
| 2.0   | 2134.9783 | 1.0084  | <a href="#">HEGSSTLVNLEGDAKEELK</a>  |
| 1.6   | 2135.9963 | -0.0095 | <a href="#">SFSTGKSPATFSVVAMAPQK</a> |

no -98 neutral loss, S14 +80  
no -98 neutral loss, S15 +80  
-98 neutral loss, T11 -18  
no -98 neutral loss, S17 +80

MS2: Top score of 37.8, match probability greater than 99%; +2 charge, deduced S14 [+80]. Moderate confidence in position assignment.

Mascot: <http://www.matrixscience.com/>
