# Supplementary material for: Proteomic responses in Arabidopsis thaliana seedlings treated with ethylene
Source: Royal Society of Chemistry journal article supplement (doi:10.1039/c1mb05159h), 2011-06-29
Supplement: c1mb05159h.zip [file c1mb05159h.zip]

# Mascot Search Results

## Peptide View

MS/MS Fragmentation of **FGSSFLSSGLIR**

Found in **AT2G39130.1**, | Symbols: | amino acid transporter family protein | chr2:16330249-16333822 REVERSE

Match to Query 2: 1349.634984 from(675.824768,2+)

Title: 20\_%\_Salt.9993.9993.2.dta

Data file C:\Users\CooperB\Desktop\Ray\mgfs\MS2special.txt

Click mouse within plot area to zoom in by factor of two about that point

Or,  200  1400

Label all possible matches ☐ Label matches used for scoring ☒

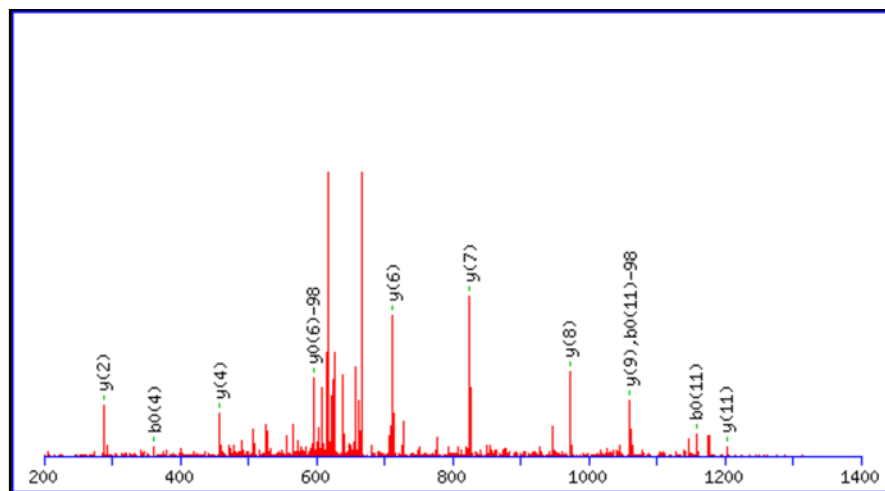

Monoisotopic mass of neutral peptide Mr(calc): 1349.6381

Fixed modifications: Carbamidomethyl (C) (apply to specified residues or termini only)

Variable modifications:

S7 : Phospho (ST), with neutral losses 0.0000(shown in table), 97.9769

Ions Score: 51 Expect: 0.00025

Matches : 11/154 fragment ions using 12 most intense peaks ([help](#))

| #  | b         | b <sup>++</sup> | b <sup>0</sup> | b <sup>0++</sup> | Seq. | y         | y <sup>++</sup> | y*        | y <sup>*++</sup> | y <sup>0</sup> | y <sup>0++</sup> | #  |
|----|-----------|-----------------|----------------|------------------|------|-----------|-----------------|-----------|------------------|----------------|------------------|----|
| 1  | 148.0757  | 74.5415         |                |                  | F    |           |                 |           |                  |                |                  | 12 |
| 2  | 205.0972  | 103.0522        |                |                  | G    | 1203.5769 | 602.2921        | 1186.5504 | 593.7788         | 1185.5664      | 593.2868         | 11 |
| 3  | 292.1292  | 146.5682        | 274.1186       | 137.5629         | S    | 1146.5555 | 573.7814        | 1129.5289 | 565.2681         | 1128.5449      | 564.7761         | 10 |
| 4  | 379.1612  | 190.0842        | 361.1506       | 181.0790         | S    | 1059.5234 | 530.2654        | 1042.4969 | 521.7521         | 1041.5129      | 521.2601         | 9  |
| 5  | 526.2296  | 263.6185        | 508.2191       | 254.6132         | F    | 972.4914  | 486.7493        | 955.4649  | 478.2361         | 954.4808       | 477.7441         | 8  |
| 6  | 639.3137  | 320.1605        | 621.3031       | 311.1552         | L    | 825.4230  | 413.2151        | 808.3964  | 404.7019         | 807.4124       | 404.2099         | 7  |
| 7  | 806.3120  | 403.6597        | 788.3015       | 394.6544         | S    | 712.3389  | 356.6731        | 695.3124  | 348.1598         | 694.3284       | 347.6678         | 6  |
| 8  | 893.3441  | 447.1757        | 875.3335       | 438.1704         | S    | 545.3406  | 273.1739        | 528.3140  | 264.6606         | 527.3300       | 264.1686         | 5  |
| 9  | 950.3655  | 475.6864        | 932.3550       | 466.6811         | G    | 458.3085  | 229.6579        | 441.2820  | 221.1446         |                |                  | 4  |
| 10 | 1063.4496 | 532.2284        | 1045.4390      | 523.2232         | L    | 401.2871  | 201.1472        | 384.2605  | 192.6339         |                |                  | 3  |
| 11 | 1176.5337 | 588.7705        | 1158.5231      | 579.7652         | I    | 288.2030  | 144.6051        | 271.1765  | 136.0919         |                |                  | 2  |
| 12 |           |                 |                |                  | R    | 175.1190  | 88.0631         | 158.0924  | 79.5498          |                |                  | 1  |

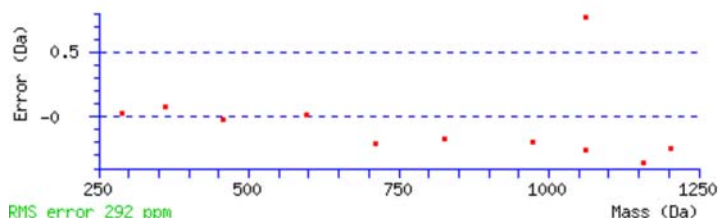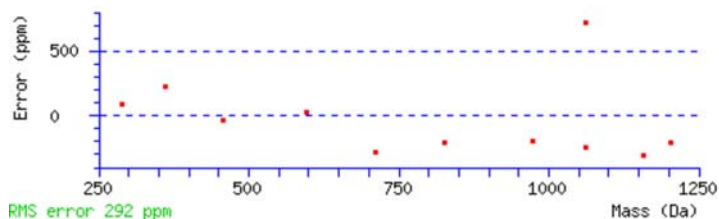

NCBI BLAST search of [FGSSFLSSGLIR](#)

(Parameters: blastp, nr protein database, expect=20000, no filter, PAM30)

Other BLAST [web gateways](#)

All matches to this query

| Score | Mr(calc): | Delta   | Sequence                     |
|-------|-----------|---------|------------------------------|
| 50.9  | 1349.6381 | -0.0031 | <a href="#">FGSSFLSSGLIR</a> |
| 50.9  | 1349.6381 | -0.0031 | <a href="#">FGSSFLSSGLIR</a> |
| 19.9  | 1349.6381 | -0.0031 | <a href="#">FGSSFLSSGLIR</a> |
| 12.7  | 1349.6381 | -0.0031 | <a href="#">FGSSFLSSGLIR</a> |
| 7.5   | 1348.6388 | 0.9962  | <a href="#">VADNSVGPLEIR</a> |
| 5.1   | 1349.6354 | -0.0004 | <a href="#">DYRRPHTGLR</a>   |
| 3.4   | 1349.6452 | -0.0103 | <a href="#">TIAAAPARQTDR</a> |
| 2.0   | 1348.6428 | 0.9922  | <a href="#">ERFTIESLFK</a>   |
| 1.7   | 1349.6479 | -0.0130 | <a href="#">SEGELLPSPTLK</a> |
| 1.5   | 1349.6479 | -0.0130 | <a href="#">IEAPEATTPTLK</a> |

no -98 neutral loss, S7 +80  
no -98 neutral loss, S8 +80  
no -98 neutral loss, S4 +80  
no -98 neutral loss, S3 +80

MS2: +2 charge;  
alternative  
positions S7 [+80]  
and S8 [+80] have  
the same mascot  
score with match  
probability of  
greater than 99%.  
But the y ion for S7  
[+80] was found  
but only deduced  
for S8 +80.  
Therefore S7 [+80]  
is correct. High  
position  
confidence.

Mascot: <http://www.matrixscience.com/>
