# Supplementary material for: Proteomic responses in Arabidopsis thaliana seedlings treated with ethylene
Source: Royal Society of Chemistry journal article supplement (doi:10.1039/c1mb05159h), 2011-06-29
Supplement: c1mb05159h.zip [file c1mb05159h.zip]

# Mascot Search Results

## Peptide View

MS/MS Fragmentation of **KISGILDDGSVGFR**

Found in **AT5G49890.1**, | Symbols: ATCLC-C, CLC-C | CLC-C (chloride channel C); anion channel/ voltage-gated chloride channel | chr5:20305715-20309369 REVERSE

Match to Query 7: 1542.739594 from(772.377073,2+)

Title: PR1acn\_grad.4511.4511.2.dta

Data file C:\Users\CooperB\Desktop\Ray\mgfs\MS2special.txt

Click mouse within plot area to zoom in by factor of two about that point

Or,  200 to  Da

Label all possible matches ☐ Label matches used for scoring ☒

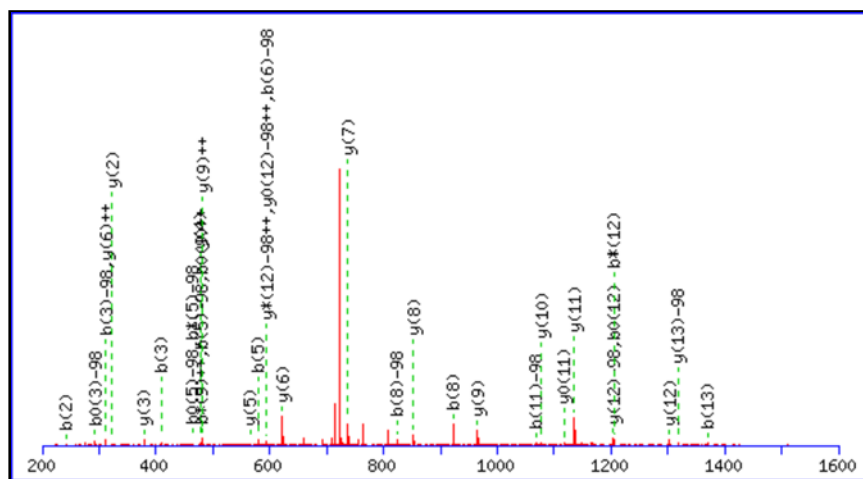

Monoisotopic mass of neutral peptide Mr(calc): 1542.7443

Fixed modifications: Carbamidomethyl (C) (apply to specified residues or termini only)

Variable modifications:

S3 : Phospho (ST), with neutral losses 97.9769(shown in table), 0.0000

Ions Score: 89 Expect: 3.9e-008

Matches : 35/222 fragment ions using 51 most intense peaks ([help](#))

| #  | b                | b <sup>++</sup> | b <sup>*</sup>  | b <sup>+++</sup> | b <sup>0</sup>  | b <sup>0++</sup> | Seq. | y                | y <sup>++</sup> | y <sup>*</sup> | y <sup>+++</sup> | y <sup>0</sup>   | y <sup>0++</sup> | #  |
|----|------------------|-----------------|-----------------|------------------|-----------------|------------------|------|------------------|-----------------|----------------|------------------|------------------|------------------|----|
| 1  | 129.1022         | 65.0548         | 112.0757        | 56.5415          |                 |                  | K    |                  |                 |                |                  |                  |                  | 14 |
| 2  | <b>242.1863</b>  | 121.5968        | 225.1598        | 113.0835         |                 |                  | I    | <b>1317.6797</b> | 659.3435        | 1300.6532      | 650.8302         | 1299.6692        | 650.3382         | 13 |
| 3  | <b>311.2078</b>  | 156.1075        | 294.1812        | 147.5942         | <b>293.1972</b> | 147.1022         | S    | <b>1204.5957</b> | 602.8015        | 1187.5691      | <b>594.2882</b>  | 1186.5851        | <b>593.7962</b>  | 12 |
| 4  | 368.2292         | 184.6183        | 351.2027        | 176.1050         | 350.2187        | 175.6130         | G    | <b>1135.5742</b> | 568.2907        | 1118.5477      | 559.7775         | <b>1117.5636</b> | 559.2855         | 11 |
| 5  | <b>481.3133</b>  | 241.1603        | <b>464.2867</b> | 232.6470         | <b>463.3027</b> | 232.1550         | I    | <b>1078.5528</b> | 539.7800        | 1061.5262      | 531.2667         | 1060.5422        | 530.7747         | 10 |
| 6  | <b>594.3974</b>  | 297.7023        | 577.3708        | 289.1890         | 576.3868        | 288.6970         | L    | <b>965.4687</b>  | <b>483.2380</b> | 948.4421       | 474.7247         | 947.4581         | 474.2327         | 9  |
| 7  | 709.4243         | 355.2158        | 692.3978        | 346.7025         | 691.4137        | 346.2105         | D    | <b>852.3846</b>  | 426.6959        | 835.3581       | 418.1827         | 834.3741         | 417.6907         | 8  |
| 8  | <b>824.4512</b>  | 412.7293        | 807.4247        | 404.2160         | 806.4407        | 403.7240         | D    | <b>737.3577</b>  | 369.1825        | 720.3311       | 360.6692         | 719.3471         | 360.1772         | 7  |
| 9  | 881.4727         | 441.2400        | 864.4462        | 432.7267         | 863.4621        | 432.2347         | G    | <b>622.3307</b>  | <b>311.6690</b> | 605.3042       | 303.1557         | 604.3202         | 302.6637         | 6  |
| 10 | 968.5047         | 484.7560        | 951.4782        | 476.2427         | 950.4942        | 475.7507         | S    | <b>565.3093</b>  | 283.1583        | 548.2827       | 274.6450         | 547.2987         | 274.1530         | 5  |
| 11 | <b>1067.5732</b> | 534.2902        | 1050.5466       | 525.7769         | 1049.5626       | 525.2849         | V    | <b>478.2772</b>  | 239.6423        | 461.2507       | 231.1290         |                  |                  | 4  |
| 12 | 1124.5946        | 562.8009        | 1107.5681       | 554.2877         | 1106.5840       | 553.7957         | G    | <b>379.2088</b>  | 190.1081        | 362.1823       | 181.5948         |                  |                  | 3  |
| 13 | 1271.6630        | 636.3352        | 1254.6365       | 627.8219         | 1253.6525       | 627.3299         | F    | <b>322.1874</b>  | 161.5973        | 305.1608       | 153.0840         |                  |                  | 2  |
| 14 |                  |                 |                 |                  |                 |                  | R    | 175.1190         | 88.0631         | 158.0924       | 79.5498          |                  |                  | 1  |

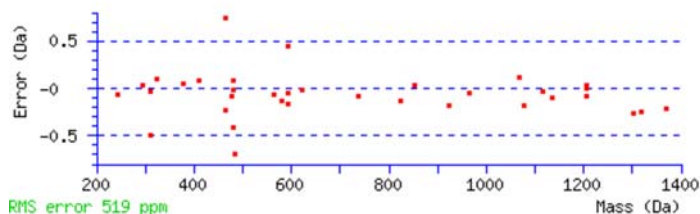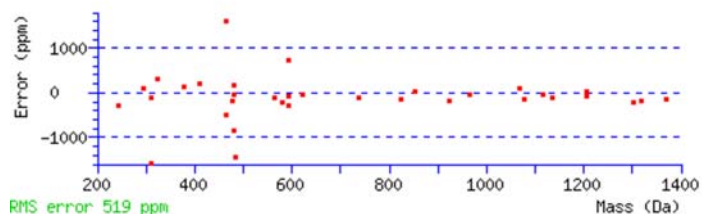

NCBI BLAST search of [KISGILDDGSVGFR](#)

(Parameters: blastp, nr protein database, expect=20000, no filter, PAM30)

Other BLAST [web gateways](#)

**All matches to this query**

| Score | Mr(calc): | Delta   | Sequence                       |
|-------|-----------|---------|--------------------------------|
| 89.5  | 1542.7443 | -0.0047 | <a href="#">KISGILDDGSVGFR</a> |
| 16.3  | 1542.7443 | -0.0047 | <a href="#">KISGILDDGSVGFR</a> |
| 9.5   | 1542.7331 | 0.0065  | <a href="#">GTGLILGTEFVDNK</a> |
| 5.5   | 1542.7443 | -0.0047 | <a href="#">IQASVVLDATGFSR</a> |
| 3.7   | 1542.7443 | -0.0047 | <a href="#">KVTEAVIGFENTR</a>  |
| 3.5   | 1541.7504 | 0.9892  | <a href="#">HFTDIKQLAPHR</a>   |
| 2.9   | 1542.7418 | -0.0022 | <a href="#">VYIMTVHFVQAR</a>   |
| 2.6   | 1541.7392 | 1.0004  | <a href="#">TDALNKPFWRSK</a>   |
| 0.6   | 1541.7313 | 1.0083  | <a href="#">LTGLIPESLCFGR</a>  |
| 0.5   | 1541.7474 | 0.9922  | <a href="#">DKPSALKPDDWDR</a>  |

neutral loss -98, S3 -18  
neutral loss -98, S10 -18

MS2: Top ranked score of 89.5 and match probability greater than 99%. +2 charge; b and y ions found for S3 [-18] and supported by MS3. High match confidence.

Mascot: <http://www.matrixscience.com/>

# Mascot Search Results

## Peptide View

MS/MS Fragmentation of **KISGILDDGSVGFR**

Found in **AT5G49890.1**, | Symbols: ATCLC-C, CLC-C | CLC-C (chloride channel C); anion channel/ voltage-gated chloride channel | chr5:20305715-20309369 REVERSE

Match to Query 4: 1446.077724 from(724.046138,2+)

Title: PR1acn\_grad.4512.4512.2.dta

Data file C:\Users\CooperB\Desktop\Ray\mgfs\MS3special.txt

Click mouse within plot area to zoom in by factor of two about that point

Or,  200 to  Da

Label all possible matches ☐ Label matches used for scoring ☒

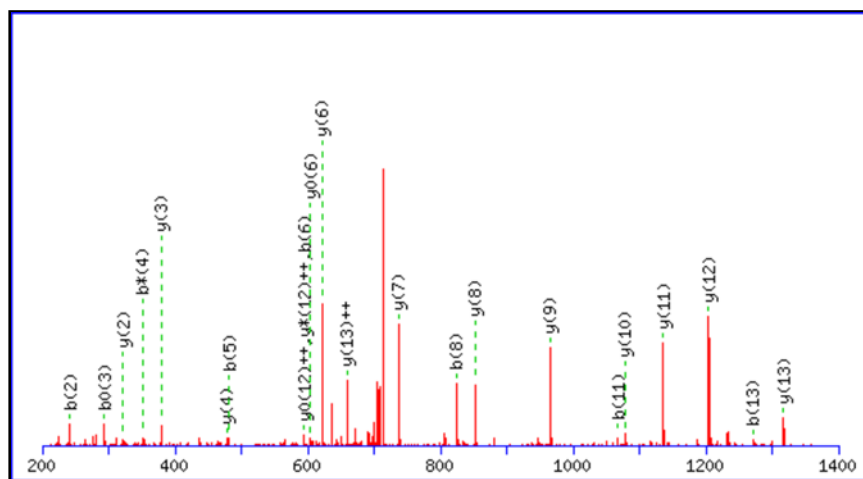

Monoisotopic mass of neutral peptide Mr(calc): 1444.7675

Fixed modifications: Carbamidomethyl (C) (apply to specified residues or termini only)

Variable modifications:

S3 : Dehydrated (S)

Ions Score: 86 Expect: 3.9e-006

Matches : 23/144 fragment ions using 36 most intense peaks ([help](#))

| #  | b                | b <sup>++</sup> | b <sup>*</sup>  | b <sup>*++</sup> | b <sup>0</sup>  | b <sup>0++</sup> | Seq. | y                | y <sup>++</sup> | y <sup>*</sup> | y <sup>*++</sup> | y <sup>0</sup>  | y <sup>0++</sup> | #  |
|----|------------------|-----------------|-----------------|------------------|-----------------|------------------|------|------------------|-----------------|----------------|------------------|-----------------|------------------|----|
| 1  | 129.1022         | 65.0548         | 112.0757        | 56.5415          |                 |                  | K    |                  |                 |                |                  |                 |                  | 14 |
| 2  | <b>242.1863</b>  | 121.5968        | 225.1598        | 113.0835         |                 |                  | I    | <b>1317.6797</b> | <b>659.3435</b> | 1300.6532      | 650.8302         | 1299.6692       | 650.3382         | 13 |
| 3  | 311.2078         | 156.1075        | 294.1812        | 147.5942         | <b>293.1972</b> | 147.1022         | S    | <b>1204.5957</b> | 602.8015        | 1187.5691      | <b>594.2882</b>  | 1186.5851       | <b>593.7962</b>  | 12 |
| 4  | 368.2292         | 184.6183        | <b>351.2027</b> | 176.1050         | 350.2187        | 175.6130         | G    | <b>1135.5742</b> | 568.2907        | 1118.5477      | 559.7775         | 1117.5636       | 559.2855         | 11 |
| 5  | <b>481.3133</b>  | 241.1603        | 464.2867        | 232.6470         | 463.3027        | 232.1550         | I    | <b>1078.5528</b> | 539.7800        | 1061.5262      | 531.2667         | 1060.5422       | 530.7747         | 10 |
| 6  | <b>594.3974</b>  | 297.7023        | 577.3708        | 289.1890         | 576.3868        | 288.6970         | L    | <b>965.4687</b>  | 483.2380        | 948.4421       | 474.7247         | 947.4581        | 474.2327         | 9  |
| 7  | 709.4243         | 355.2158        | 692.3978        | 346.7025         | 691.4137        | 346.2105         | D    | <b>852.3846</b>  | 426.6959        | 835.3581       | 418.1827         | 834.3741        | 417.6907         | 8  |
| 8  | <b>824.4512</b>  | 412.7293        | 807.4247        | 404.2160         | 806.4407        | 403.7240         | D    | <b>737.3577</b>  | 369.1825        | 720.3311       | 360.6692         | 719.3471        | 360.1772         | 7  |
| 9  | 881.4727         | 441.2400        | 864.4462        | 432.7267         | 863.4621        | 432.2347         | G    | <b>622.3307</b>  | 311.6690        | 605.3042       | 303.1557         | <b>604.3202</b> | 302.6637         | 6  |
| 10 | 968.5047         | 484.7560        | 951.4782        | 476.2427         | 950.4942        | 475.7507         | S    | 565.3093         | 283.1583        | 548.2827       | 274.6450         | 547.2987        | 274.1530         | 5  |
| 11 | <b>1067.5731</b> | 534.2902        | 1050.5466       | 525.7769         | 1049.5626       | 525.2849         | V    | <b>478.2772</b>  | 239.6423        | 461.2507       | 231.1290         |                 |                  | 4  |
| 12 | 1124.5946        | 562.8009        | 1107.5681       | 554.2877         | 1106.5840       | 553.7957         | G    | <b>379.2088</b>  | 190.1081        | 362.1823       | 181.5948         |                 |                  | 3  |
| 13 | <b>1271.6630</b> | 636.3352        | 1254.6365       | 627.8219         | 1253.6525       | 627.3299         | F    | <b>322.1874</b>  | 161.5973        | 305.1608       | 153.0840         |                 |                  | 2  |
| 14 |                  |                 |                 |                  |                 |                  | R    | 175.1190         | 88.0631         | 158.0924       | 79.5498          |                 |                  | 1  |

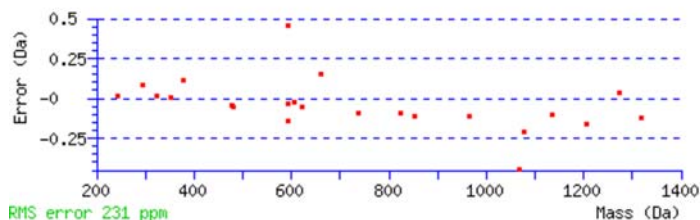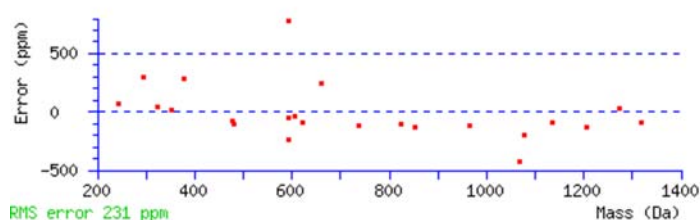

NCBI BLAST search of [KISGILDDGSVGFR](#)

(Parameters: blastp, nr protein database, expect=20000, no filter, PAM30)

Other BLAST [web gateways](#)

All matches to this query

| Score | Mr(calc): | Delta   | Sequence                       |
|-------|-----------|---------|--------------------------------|
| 85.7  | 1444.7675 | 1.3103  | <a href="#">KISGILDDGSVGFR</a> |
| 31.2  | 1444.7675 | 1.3103  | <a href="#">KISGILDDGSVGFR</a> |
| 16.8  | 1445.8243 | 0.2535  | <a href="#">LKVLSESLNSTSK</a>  |
| 16.7  | 1445.8243 | 0.2535  | <a href="#">LKVLSESLNSTSK</a>  |
| 16.1  | 1445.8144 | 0.2633  | <a href="#">ITATLLPPPPTSHR</a> |
| 15.1  | 1445.6817 | 0.3960  | <a href="#">QLSSLSHTSITHK</a>  |
| 15.1  | 1445.6817 | 0.3960  | <a href="#">QLSSLSHTSITHK</a>  |
| 15.1  | 1445.7895 | 0.2883  | <a href="#">IKPLSTSPSLKTL</a>  |
| 14.4  | 1445.7895 | 0.2883  | <a href="#">IKPLSTSPSLKTL</a>  |
| 14.3  | 1446.5446 | -0.4669 | <a href="#">KDSGMSSNTESSR</a>  |

S3 -18  
S10 -18

MS3: -98 Da  
triggered  
consecutive  
spectrum.  
Corroborating ions,  
y ion found for S3  
[-18].

Mascot: <http://www.matrixscience.com/>
