# Supplementary material for: Proteomic responses in Arabidopsis thaliana seedlings treated with ethylene
Source: Royal Society of Chemistry journal article supplement (doi:10.1039/c1mb05159h), 2011-06-29
Supplement: c1mb05159h.zip [file c1mb05159h.zip]

# Mascot Search Results

## Peptide View

MS/MS Fragmentation of **GGSFESSRPSSR**

Found in **AT4G12770.1**, | Symbols: | heat shock protein binding | chr4:7506733-7511405 REVERSE

Match to Query 8: 1572.447723 from(525.156517,3+)

Title: PR470\_%\_Salt.11572.11572.3.dta

Data file C:\Users\CooperB\Desktop\Ray\mgfs\MS2special.txt

Click mouse within plot area to zoom in by factor of two about that point

Or,  150 to 850 Da

Label all possible matches ☐ Label matches used for scoring ☒

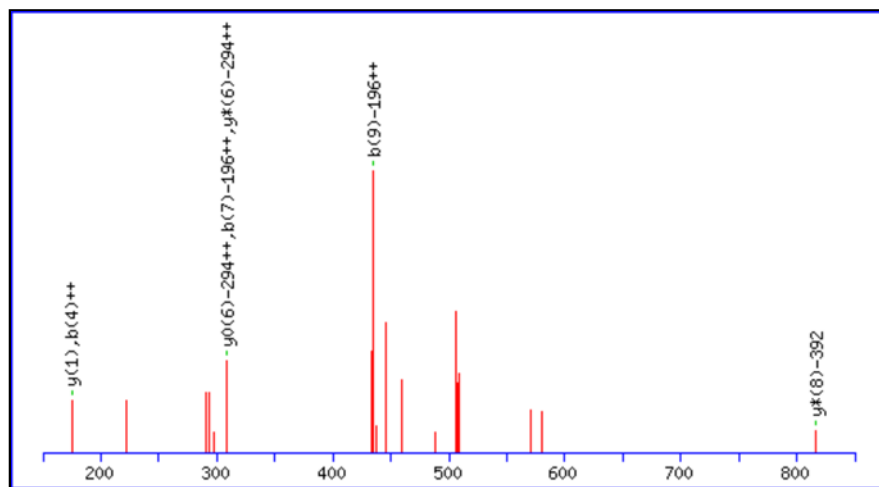

Monoisotopic mass of neutral peptide Mr(calc): 1572.4449

Fixed modifications: Carbamidomethyl (C) (apply to specified residues or termini only)

Variable modifications:

S6 : Phospho (ST), with neutral losses 97.9769(shown in table), 0.0000

S7 : Phospho (ST), with neutral losses 97.9769(shown in table), 0.0000

S10 : Phospho (ST), with neutral losses 97.9769(shown in table), 0.0000

S11 : Phospho (ST), with neutral losses 97.9769(shown in table), 0.0000

Ions Score: 12 Expect: 0.15

Matches : 7/204 fragment ions using 6 most intense peaks ([help](#))

| #  | b         | b <sup>++</sup> | b <sup>*</sup> | b <sup>*++</sup> | b <sup>0</sup> | b <sup>0++</sup> | Seq. | y         | y <sup>++</sup> | y <sup>*</sup> | y <sup>*++</sup> | y <sup>0</sup> | y <sup>0++</sup> | #  |
|----|-----------|-----------------|----------------|------------------|----------------|------------------|------|-----------|-----------------|----------------|------------------|----------------|------------------|----|
| 1  | 58.0287   | 29.5180         |                |                  |                |                  | G    |           |                 |                |                  |                |                  | 12 |
| 2  | 115.0502  | 58.0287         |                |                  |                |                  | G    | 1124.5232 | 562.7652        | 1107.4966      | 554.2520         | 1106.5126      | 553.7599         | 11 |
| 3  | 202.0822  | 101.5448        |                |                  | 184.0717       | 92.5395          | S    | 1067.5017 | 534.2545        | 1050.4752      | 525.7412         | 1049.4911      | 525.2492         | 10 |
| 4  | 349.1506  | 175.0790        |                |                  | 331.1401       | 166.0737         | F    | 980.4697  | 490.7385        | 963.4431       | 482.2252         | 962.4591       | 481.7332         | 9  |
| 5  | 478.1932  | 239.6003        |                |                  | 460.1827       | 230.5950         | E    | 833.4013  | 417.2043        | 816.3747       | 408.6910         | 815.3907       | 408.1990         | 8  |
| 6  | 547.2147  | 274.1110        |                |                  | 529.2041       | 265.1057         | S    | 704.3587  | 352.6830        | 687.3321       | 344.1697         | 686.3481       | 343.6777         | 7  |
| 7  | 616.2362  | 308.6217        |                |                  | 598.2256       | 299.6164         | S    | 635.3372  | 318.1722        | 618.3107       | 309.6590         | 617.3267       | 309.1670         | 6  |
| 8  | 772.3373  | 386.6723        | 755.3107       | 378.1590         | 754.3267       | 377.6670         | R    | 566.3158  | 283.6615        | 549.2892       | 275.1482         | 548.3052       | 274.6562         | 5  |
| 9  | 869.3900  | 435.1987        | 852.3635       | 426.6854         | 851.3795       | 426.1934         | P    | 410.2146  | 205.6110        | 393.1881       | 197.0977         | 392.2041       | 196.6057         | 4  |
| 10 | 938.4115  | 469.7094        | 921.3850       | 461.1961         | 920.4009       | 460.7041         | S    | 313.1619  | 157.0846        | 296.1353       | 148.5713         | 295.1513       | 148.0793         | 3  |
| 11 | 1007.4330 | 504.2201        | 990.4064       | 495.7068         | 989.4224       | 495.2148         | S    | 244.1404  | 122.5738        | 227.1139       | 114.0606         | 226.1299       | 113.5686         | 2  |
| 12 |           |                 |                |                  |                |                  | R    | 175.1190  | 88.0631         | 158.0924       | 79.5498          |                |                  | 1  |

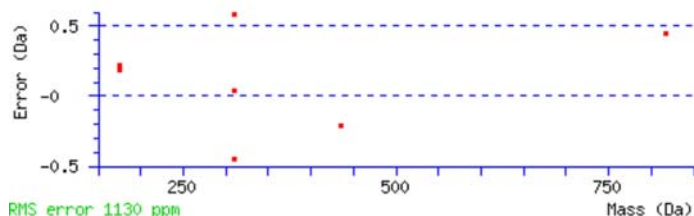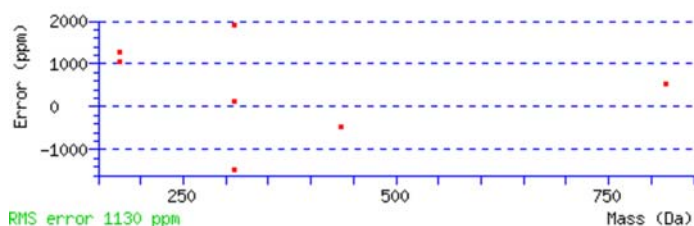

NCBI **BLAST** search of [GGSFESSRPSSR](#)

(Parameters: blastp, nr protein database, expect=20000, no filter, PAM30)

Other BLAST [web gateways](#)

**All matches to this query**

| Score | Mr(calc): | Delta   | Sequence                       |
|-------|-----------|---------|--------------------------------|
| 12.4  | 1572.4449 | 0.0028  | <a href="#">GGSFESSRPSSR</a>   |
| 6.4   | 1571.4531 | 0.9947  | <a href="#">VSSGTQTSLGR</a>    |
| 5.7   | 1571.4531 | 0.9947  | <a href="#">VSSGTQTSLGR</a>    |
| 5.2   | 1572.4532 | -0.0054 | <a href="#">GSSGSYQSSSSGSR</a> |
| 4.7   | 1572.4548 | -0.0071 | <a href="#">DVSGTSTVSSTGR</a>  |
| 3.6   | 1571.4531 | 0.9947  | <a href="#">VSSGTQTSLGR</a>    |
| 3.6   | 1571.4531 | 0.9947  | <a href="#">VSSGTQTSLGR</a>    |
| 2.9   | 1572.4532 | -0.0054 | <a href="#">GSSGSYQSSSSGSR</a> |
| 2.9   | 1572.4523 | -0.0046 | <a href="#">TAASWSSMVSAR</a>   |
| 2.9   | 1571.4531 | 0.9947  | <a href="#">VSSGTQTSLGR</a>    |

MS2: Top score of 12.4 is very low and match probability is just 85%. +3 charge, -98 neutral loss and deduced S6, S7, S10, S11 [-18]; multiply phosphorylated peptides ionize poorly. Low position confidence.

Mascot: [http://w](#)
