# Supplementary material for: Proteomic responses in Arabidopsis thaliana seedlings treated with ethylene
Source: Royal Society of Chemistry journal article supplement (doi:10.1039/c1mb05159h), 2011-06-29
Supplement: c1mb05159h.zip [file c1mb05159h.zip]

## Mascot Search Results

### Peptide View

MS/MS Fragmentation of **GMDSQMTSSLYDSLKQQR**

Found in **AT5G03280.1**, | Symbols: EIN2, PIR2, CKR1, ERA3, ORE3, ORE2 | EIN2 (ETHYLENE INSENSITIVE 2); transporter | chr5:788588-793065 FORWARD

Match to Query 15: 2410.791723 from(804.604517,3+)

Title: PR4acn\_grad.15974.15974.3.dta

Data file C:\Users\CooperB\Desktop\Ray\mgfs\MS2special.txt

Click mouse within plot area to zoom in by factor of two about that point.

|     |           |     |    |      |    |            |
|-----|-----------|-----|----|------|----|------------|
| Or, | Plot from | 200 | to | 1500 | Da | Full range |
|-----|-----------|-----|----|------|----|------------|

Label all possible matches ☐ Label matches used for scoring ☒

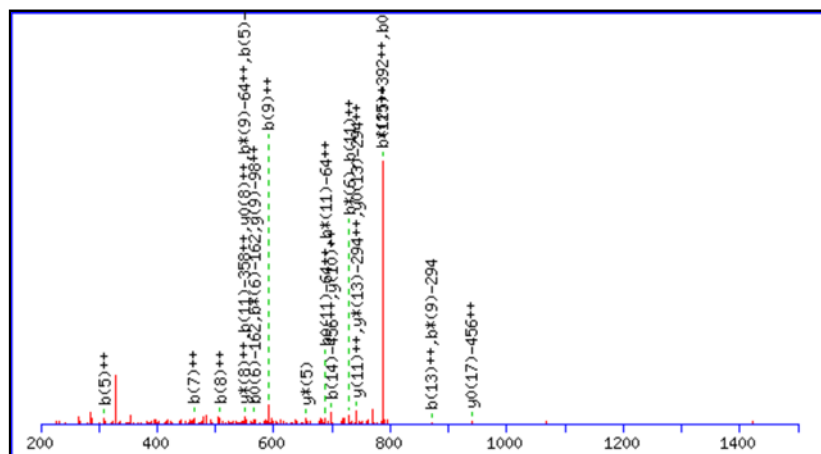

Monoisotopic mass of neutral peptide Mr(calc): 2409.8061

**Fixed modifications:** Carbamidomethyl (C) (apply to specified residues or termini only)

## Variable modifications:

**M2** : Oxidation (M), with neutral losses 0.0000(shown in table), 63.9983

**S4** : Phospho (ST), with neutral losses 0.0000(shown in table), 97.9769

**T7** : Phospho (ST), with neutral losses 0.0000(shown in table), 97.9769

S9 : Phospho (ST), with neutral losses 0.0000(shown in table), 97.9769

**S13** : Phospho (ST), with neutral losses 0.0000(shown in table), 97.9769

**Ions Score: 17 Expect: 0.13**

**Matches :** 29/518 fragment ions using 34 most intense peaks ([help](#))

| #  | b         | b <sup>++</sup> | b*        | b <sup>*++</sup> | b <sup>0</sup> | b <sup>0++</sup> | Seq. | y         | y <sup>++</sup> | y*        | y <sup>*++</sup> | y <sup>0</sup> | y <sup>0++</sup> | #  |
|----|-----------|-----------------|-----------|------------------|----------------|------------------|------|-----------|-----------------|-----------|------------------|----------------|------------------|----|
| 1  | 58.0287   | 29.5180         |           |                  |                |                  | G    |           |                 |           |                  |                |                  | 18 |
| 2  | 205.0641  | 103.0357        |           |                  |                |                  | M    | 2353.7920 | 1177.3996       | 2336.7654 | 1168.8864        | 2335.7814      | 1168.3944        | 17 |
| 3  | 320.0911  | 160.5492        |           |                  | 302.0805       | 151.5439         | D    | 2206.7566 | 1103.8819       | 2189.7300 | 1095.3687        | 2188.7460      | 1094.8767        | 16 |
| 4  | 487.0894  | 244.0484        |           |                  | 469.0789       | 235.0431         | S    | 2091.7296 | 1046.3685       | 2074.7031 | 1037.8552        | 2073.7191      | 1037.3632        | 15 |
| 5  | 615.1480  | 308.0776        | 598.1215  | 299.5644         | 597.1375       | 299.0724         | Q    | 1924.7313 | 962.8693        | 1907.7047 | 954.3560         | 1906.7207      | 953.8640         | 14 |
| 6  | 746.1885  | 373.5979        | 729.1620  | 365.0846         | 728.1779       | 364.5926         | M    | 1796.6727 | 898.8400        | 1779.6462 | 890.3267         | 1778.6621      | 889.8347         | 13 |
| 7  | 927.2025  | 464.1049        | 910.1760  | 455.5916         | 909.1919       | 455.0996         | T    | 1665.6322 | 833.3198        | 1648.6057 | 824.8065         | 1647.6217      | 824.3145         | 12 |
| 8  | 1014.2345 | 507.6209        | 997.2080  | 499.1076         | 996.2240       | 498.6156         | S    | 1484.6182 | 742.8127        | 1467.5917 | 734.2995         | 1466.6077      | 733.8075         | 11 |
| 9  | 1181.2329 | 591.1201        | 1164.2064 | 582.6068         | 1163.2223      | 582.1148         | S    | 1397.5862 | 699.2967        | 1380.5596 | 690.7835         | 1379.5756      | 690.2915         | 10 |
| 10 | 1294.3170 | 647.6621        | 1277.2904 | 639.1488         | 1276.3064      | 638.6568         | L    | 1230.5878 | 615.7976        | 1213.5613 | 607.2843         | 1212.5773      | 606.7923         | 9  |
| 11 | 1457.3803 | 729.1938        | 1440.3537 | 720.6805         | 1439.3697      | 720.1885         | Y    | 1117.5038 | 559.2555        | 1100.4772 | 550.7422         | 1099.4932      | 550.2502         | 8  |
| 12 | 1572.4072 | 786.7073        | 1555.3807 | 778.1940         | 1554.3967      | 777.7020         | D    | 954.4404  | 477.7239        | 937.4139  | 469.2106         | 936.4299       | 468.7186         | 7  |
| 13 | 1739.4056 | 870.2064        | 1722.3790 | 861.6932         | 1721.3950      | 861.2012         | S    | 839.4135  | 420.2104        | 822.3869  | 411.6971         | 821.4029       | 411.2051         | 6  |
| 14 | 1852.4897 | 926.7485        | 1835.4631 | 918.2352         | 1834.4791      | 917.7432         | L    | 672.4151  | 336.7112        | 655.3886  | 328.1979         |                |                  | 5  |
| 15 | 1980.5846 | 990.7960        | 1963.5581 | 982.2827         | 1962.5741      | 981.7907         | K    | 559.3311  | 280.1692        | 542.3045  | 271.6559         |                |                  | 4  |
| 16 | 2108.6432 | 1054.8252       | 2091.6167 | 1046.3120        | 2090.6326      | 1045.8200        | Q    | 431.2361  | 216.1217        | 414.2096  | 207.6084         |                |                  | 3  |
| 17 | 2236.7018 | 1118.8545       | 2219.6752 | 1110.3413        | 2218.6912      | 1109.8492        | Q    | 303.1775  | 152.0924        | 286.1510  | 143.5791         |                |                  | 2  |
| 18 |           |                 |           |                  |                |                  | R    | 175.1190  | 88.0631         | 158.0924  | 79.5498          |                |                  | 1  |

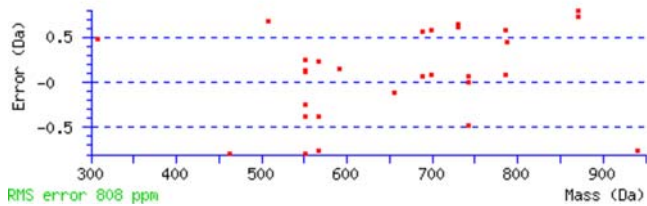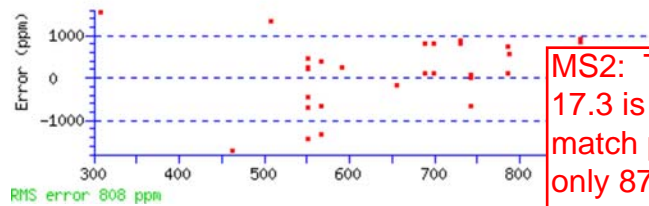

NCBI BLAST search of [GMDSQMTSSLYDSLKQQR](#)

(Parameters: blastp, nr protein database, expect=20000, no filter, PAM30)

Other BLAST [web gateways](#)

All matches to this query

| Score | Mr(calc): | Delta   | Sequence                              |
|-------|-----------|---------|---------------------------------------|
| 17.3  | 2409.8061 | 0.9856  | <a href="#">GMDSQMTSSLYDSLKQQR</a>    |
| 11.2  | 2410.7979 | -0.0061 | <a href="#">SSNGGGGGSGSGSSLENQPRR</a> |
| 9.8   | 2409.7979 | 0.9938  | <a href="#">CTAFPLNGTSMNGVSVISR</a>   |
| 9.0   | 2409.8061 | 0.9856  | <a href="#">GMDSQMTSSLYDSLKQQR</a>    |
| 8.8   | 2409.8061 | 0.9856  | <a href="#">GMDSQMTSSLYDSLKQQR</a>    |
| 8.8   | 2409.8061 | 0.9856  | <a href="#">GMDSQMTSSLYDSLKQQR</a>    |
| 8.3   | 2410.7874 | 0.0043  | <a href="#">NYPSNPNPSTDFTEFFK</a>     |
| 6.4   | 2409.8061 | 0.9856  | <a href="#">GMDSQMTSSLYDSLKQQR</a>    |
| 6.4   | 2409.8061 | 0.9856  | <a href="#">GMDSQMTSSLYDSLKQQR</a>    |
| 6.4   | 2409.8061 | 0.9856  | <a href="#">GMDSQMTSSLYDSLKQQR</a>    |

no -98 loss; S4, T7, S9, S13 +80, oxM2

no, -98 loss; S4, T7, S9, S13 +80, oxM 6

MS2: Top score of 17.3 is low and match probability only 87%. +3 charge; all sites with +80 deduced. This multiply phosphorylated peptide ionized poorly. Low position confidence

Mascot: <http://www.matrixscience.com/>
