# Supplementary material for: Proteomic responses in Arabidopsis thaliana seedlings treated with ethylene
Source: Royal Society of Chemistry journal article supplement (doi:10.1039/c1mb05159h), 2011-06-29
Supplement: c1mb05159h.zip [file c1mb05159h.zip]

**Mascot Search Results****Peptide View**MS/MS Fragmentation of **LSSQGLSPIPSR**Found in **AT2G39130.1**, | Symbols: | amino acid transporter family protein | chr2:16330249-16333822 REVERSE

Match to Query 4: 1433.727884 from(717.871218,2+)

Title: FR420\_%\_Salt.7600.7600.2.dta

Data file C:\Users\CooperB\Desktop\Ray\mgfs\MS2special.txt

Click mouse within plot area to zoom in by factor of two about that point

Or,  200  1400  Label all possible matches ☐ Label matches used for scoring ☒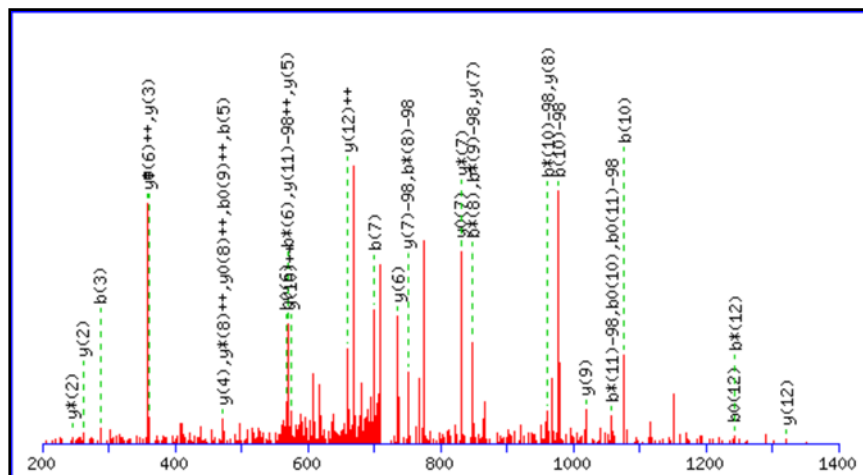

Monoisotopic mass of neutral peptide Mr(calc): 1433.7279

Fixed modifications: Carbamidomethyl (C) (apply to specified residues or termini only)

Variable modifications:

S8 : Phospho (ST), with neutral losses 0.0000(shown in table), 97.9769

Ions score: 51 Expect: 0.00024

Matches : 37/206 fragment ions using 46 most intense peaks ([help](#))

| #  | b         | b <sup>++</sup> | b <sup>*</sup> | b <sup>+++</sup> | b <sup>0</sup> | b <sup>0++</sup> | Seq. | y         | y <sup>++</sup> | y <sup>*</sup> | y <sup>+++</sup> | y <sup>0</sup> | y <sup>0++</sup> | #  |
|----|-----------|-----------------|----------------|------------------|----------------|------------------|------|-----------|-----------------|----------------|------------------|----------------|------------------|----|
| 1  | 114.0913  | 57.5493         |                |                  |                |                  | L    |           |                 |                |                  |                |                  | 13 |
| 2  | 201.1234  | 101.0653        |                |                  | 183.1128       | 92.0600          | S    | 1321.6512 | 661.3292        | 1304.6246      | 652.8159         | 1303.6406      | 652.3239         | 12 |
| 3  | 288.1554  | 144.5813        |                |                  | 270.1448       | 135.5761         | S    | 1234.6191 | 617.8132        | 1217.5926      | 609.2999         | 1216.6086      | 608.8079         | 11 |
| 4  | 416.2140  | 208.6106        | 399.1874       | 200.0974         | 398.2034       | 199.6053         | Q    | 1147.5871 | 574.2972        | 1130.5606      | 565.7839         | 1129.5765      | 565.2919         | 10 |
| 5  | 473.2354  | 237.1214        | 456.2089       | 228.6081         | 455.2249       | 228.1161         | G    | 1019.5285 | 510.2679        | 1002.5020      | 501.7546         | 1001.5180      | 501.2626         | 9  |
| 6  | 586.3195  | 293.6634        | 569.2930       | 285.1501         | 568.3089       | 284.6581         | L    | 962.5071  | 481.7572        | 945.4805       | 473.2439         | 944.4965       | 472.7519         | 8  |
| 7  | 699.4036  | 350.2054        | 682.3770       | 341.6921         | 681.3930       | 341.2001         | L    | 849.4230  | 425.2151        | 832.3964       | 416.7019         | 831.4124       | 416.2099         | 7  |
| 8  | 866.4019  | 433.7046        | 849.3754       | 425.1913         | 848.3914       | 424.6993         | S    | 736.3389  | 368.6731        | 719.3124       | 360.1598         | 718.3284       | 359.6678         | 6  |
| 9  | 963.4547  | 482.2310        | 946.4281       | 473.7177         | 945.4441       | 473.2257         | P    | 569.3406  | 285.1739        | 552.3140       | 276.6606         | 551.3300       | 276.1686         | 5  |
| 10 | 1076.5388 | 538.7730        | 1059.5122      | 530.2597         | 1058.5282      | 529.7677         | I    | 472.2878  | 236.6475        | 455.2613       | 228.1343         | 454.2772       | 227.6423         | 4  |
| 11 | 1173.5915 | 587.2994        | 1156.5650      | 578.7861         | 1155.5810      | 578.2941         | P    | 359.2037  | 180.1055        | 342.1772       | 171.5922         | 341.1932       | 171.1002         | 3  |
| 12 | 1260.6235 | 630.8154        | 1243.5970      | 622.3021         | 1242.6130      | 621.8101         | S    | 262.1510  | 131.5791        | 245.1244       | 123.0659         | 244.1404       | 122.5738         | 2  |
| 13 |           |                 |                |                  |                |                  | R    | 175.1190  | 88.0631         | 158.0924       | 79.5498          |                |                  | 1  |

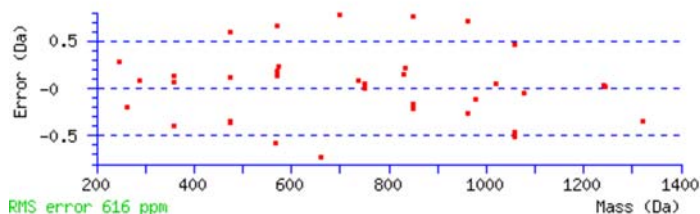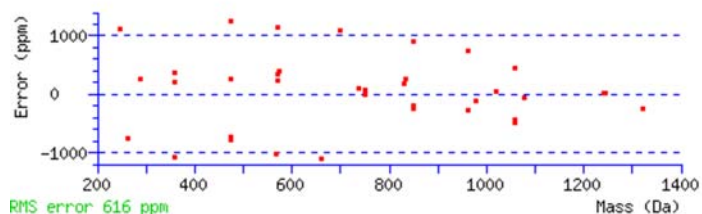

NCBI BLAST search of [LSSQGLLSPIPSR](#)

(Parameters: blastp, nr protein database, expect=20000, no filter, PAM30)

Other BLAST [web gateways](#)

All matches to this query

| Score | Mr(calc): | Delta   | Sequence                      |
|-------|-----------|---------|-------------------------------|
| 51.1  | 1433.7279 | -0.0000 | <a href="#">LSSQGLLSPIPSR</a> |
| 18.4  | 1433.7279 | -0.0000 | <a href="#">LSSQGLLSPIPSR</a> |
| 18.4  | 1433.7279 | -0.0000 | <a href="#">LSSQGLLSPIPSR</a> |
| 17.8  | 1433.7279 | -0.0000 | <a href="#">LSSQGLLSPIPSR</a> |
| 7.9   | 1432.7133 | 1.0146  | <a href="#">LYCSGHIIDSLR</a>  |
| 7.2   | 1433.7337 | -0.0058 | <a href="#">LKCAIDLDFPSR</a>  |
| 5.7   | 1432.7340 | 0.9939  | <a href="#">IQVPYVSHVRR</a>   |
| 5.6   | 1433.7319 | -0.0040 | <a href="#">TKFLPLEELHK</a>   |
| 4.5   | 1433.7263 | 0.0016  | <a href="#">VLFSDGRSTSTHK</a> |
| 2.4   | 1433.7184 | 0.0095  | <a href="#">VIADAGTMTDLAR</a> |

no -98 neutral loss, S8 +80  
 -98 neutral loss, S3 -18  
 -98 neutral loss, S2 -18  
 no -98 neutral loss, S12 +80

MS2: Top score 51.1, match probability greater than 99%; +2 charge; b and y ions found for S8 [+80]. High positioning confidence.

Mascot: <http://www.matrixscience.com/>
