# Supplementary material for: Proteomic responses in Arabidopsis thaliana seedlings treated with ethylene
Source: Royal Society of Chemistry journal article supplement (doi:10.1039/c1mb05159h), 2011-06-29
Supplement: c1mb05159h.zip [file c1mb05159h.zip]

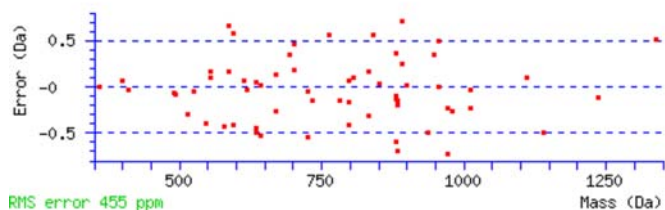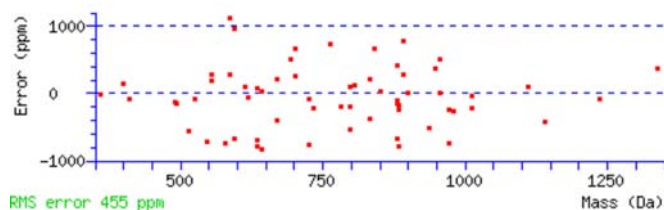

NCBI **BLAST** search of [LLEHFLVQEQTGSSPSR](#)

(Parameters: blastp, nr protein database, expect=20000, no filter, PAM30)

Other BLAST [web gateways](#)

**All matches to this query**

| Score | Mr(calc): | Delta   | Sequence                             |
|-------|-----------|---------|--------------------------------------|
| 36.1  | 2135.9888 | -0.0013 | <a href="#">LLEHFLVQEQTGSSPSR</a>    |
| 28.6  | 2135.9888 | -0.0013 | <a href="#">LLEHFLVQEQTGSSPSR</a>    |
| 25.7  | 2135.9888 | -0.0013 | <a href="#">LLEHFLVQEQTGSSPSR</a>    |
| 11.1  | 2135.9888 | -0.0013 | <a href="#">LLEHFLVQEQTGSSPSR</a>    |
| 7.2   | 2134.9745 | 1.0130  | <a href="#">DYSCESGTLLLVIDELTK</a>   |
| 5.8   | 2136.0034 | -0.0159 | <a href="#">NMLSSSNLIVQPGGPGERK</a>  |
| 5.8   | 2136.0034 | -0.0159 | <a href="#">NMLSSSNLIVQPGGPGERK</a>  |
| 5.1   | 2135.9810 | 0.0065  | <a href="#">MAEISATSPSSSSSALVIR</a>  |
| 4.8   | 2136.0075 | -0.0200 | <a href="#">MSPSIVAVVGTNLNWPEANR</a> |
| 4.5   | 2134.9745 | 1.0130  | <a href="#">DYSCESGTLLLVIDELTK</a>   |

no -98 neutral loss, S15 +80  
no -98 neutral loss, S14 +80  
no -98 neutral loss, S17 +80  
no -98 neutral loss, T11 +80

MS2: Top score of 36.1 and match probability of 99%; +3 charge, y ion found for S15 [+80]. High position confidence.

Mascot: <http://www.matrixscience.com/>
