# Supplementary material for: Proteomic responses in Arabidopsis thaliana seedlings treated with ethylene
Source: Royal Society of Chemistry journal article supplement (doi:10.1039/c1mb05159h), 2011-06-29
Supplement: c1mb05159h.zip [file c1mb05159h.zip]

**Mascot Search Results****Peptide View**MS/MS Fragmentation of **TPGSIDSLYGLQR**

Found in **AT5G03280.1**, | Symbols: EIN2, PIR2, CKR1, ERA3, ORE3, ORE2 | EIN2 (ETHYLENE INSENSITIVE 2); transporter | chr5:788588-793065 FORWARD

Match to Query 5: 1485.690724 from(743.852638,2+)

Title: PR4acn\_grad.4271.4271.2.dta

Data file C:\Users\CooperB\Desktop\Ray\mgfs\MS2special.txt

Click mouse within plot area to zoom in by factor of two about that point

Or,  200 to  Da

Label all possible matches ☐ Label matches used for scoring ☒

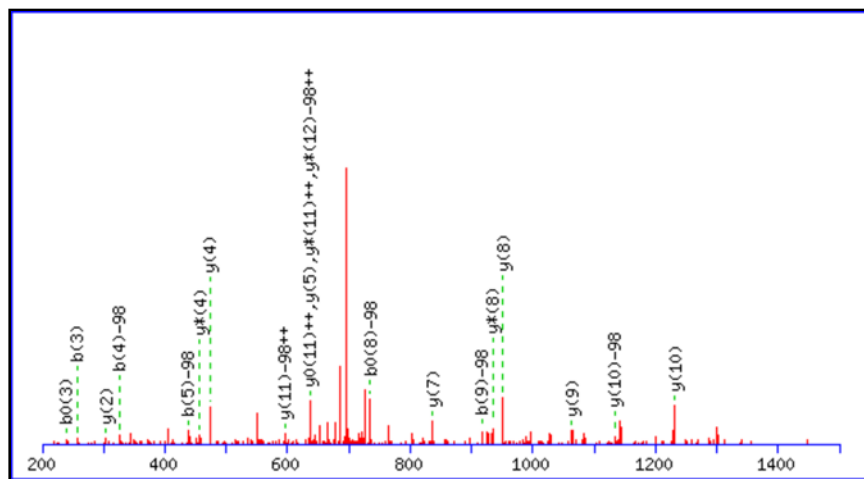

Monoisotopic mass of neutral peptide **Mr(calc)**: 1485.6865

**Fixed modifications**: Carbamidomethyl (C) (apply to specified residues or termini only)

**Variable modifications**:

S4 : Phospho (ST), with neutral losses 97.9769(shown in table), 0.0000

**Ions Score**: 36 **Expect**: 0.0087

**Matches** : 20/166 fragment ions using 37 most intense peaks ([help](#))

| #  | b         | b <sup>++</sup> | b <sup>*</sup> | b <sup>*++</sup> | b <sup>0</sup> | b <sup>0++</sup> | Seq. | y         | y <sup>++</sup> | y <sup>*</sup> | y <sup>*++</sup> | y <sup>0</sup> | y <sup>0++</sup> | #  |
|----|-----------|-----------------|----------------|------------------|----------------|------------------|------|-----------|-----------------|----------------|------------------|----------------|------------------|----|
| 1  | 102.0550  | 51.5311         |                |                  | 84.0444        | 42.5258          | T    |           |                 |                |                  |                |                  | 13 |
| 2  | 199.1077  | 100.0575        |                |                  | 181.0972       | 91.0522          | P    | 1287.6692 | 644.3382        | 1270.6426      | 635.8250         | 1269.6586      | 635.3329         | 12 |
| 3  | 256.1292  | 128.5682        |                |                  | 238.1186       | 119.5629         | G    | 1190.6164 | 595.8118        | 1173.5899      | 587.2986         | 1172.6058      | 586.8066         | 11 |
| 4  | 325.1506  | 163.0790        |                |                  | 307.1401       | 154.0737         | S    | 1133.5949 | 567.3011        | 1116.5684      | 558.7878         | 1115.5844      | 558.2958         | 10 |
| 5  | 438.2347  | 219.6210        |                |                  | 420.2241       | 210.6157         | I    | 1064.5735 | 532.7904        | 1047.5469      | 524.2771         | 1046.5629      | 523.7851         | 9  |
| 6  | 553.2617  | 277.1345        |                |                  | 535.2511       | 268.1292         | D    | 951.4894  | 476.2483        | 934.4629       | 467.7351         | 933.4789       | 467.2431         | 8  |
| 7  | 640.2937  | 320.6505        |                |                  | 622.2831       | 311.6452         | S    | 836.4625  | 418.7349        | 819.4359       | 410.2216         | 818.4519       | 409.7296         | 7  |
| 8  | 753.3777  | 377.1925        |                |                  | 735.3672       | 368.1872         | L    | 749.4305  | 375.2189        | 732.4039       | 366.7056         |                |                  | 6  |
| 9  | 916.4411  | 458.7242        |                |                  | 898.4305       | 449.7189         | Y    | 636.3464  | 318.6768        | 619.3198       | 310.1636         |                |                  | 5  |
| 10 | 973.4625  | 487.2349        |                |                  | 955.4520       | 478.2296         | G    | 473.2831  | 237.1452        | 456.2565       | 228.6319         |                |                  | 4  |
| 11 | 1086.5466 | 543.7769        |                |                  | 1068.5360      | 534.7717         | L    | 416.2616  | 208.6344        | 399.2350       | 200.1212         |                |                  | 3  |
| 12 | 1214.6052 | 607.8062        | 1197.5786      | 599.2930         | 1196.5946      | 598.8009         | Q    | 303.1775  | 152.0924        | 286.1510       | 143.5791         |                |                  | 2  |
| 13 |           |                 |                |                  |                |                  | R    | 175.1190  | 88.0631         | 158.0924       | 79.5498          |                |                  | 1  |

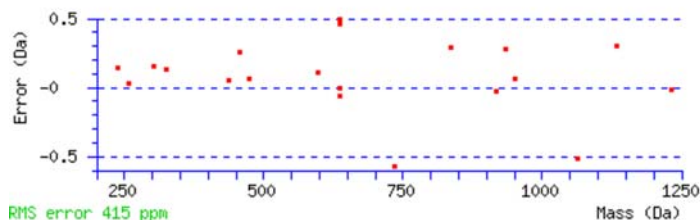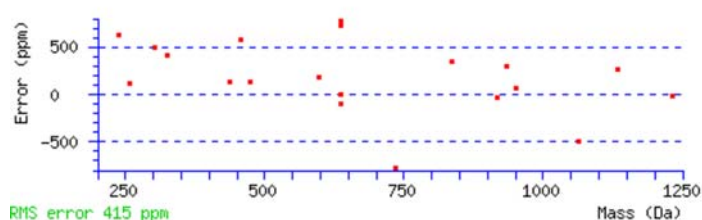

NCBI BLAST search of [TPGSIDSLYGLQR](#)

(Parameters: blastp, nr protein database, expect=20000, no filter, PAM30)

Other BLAST [web gateways](#)

All matches to this query

| Score | Mr(calc): | Delta  | Sequence                      |
|-------|-----------|--------|-------------------------------|
| 35.6  | 1485.6865 | 0.0043 | <a href="#">TPGSIDSLYGLQR</a> |
| 26.1  | 1485.6865 | 0.0043 | <a href="#">TPGSIDSLYGLQR</a> |
| 13.9  | 1485.6865 | 0.0043 | <a href="#">TPGSIDSLYGLQR</a> |
| 11.2  | 1484.6872 | 1.0036 | <a href="#">GTSNSILEEATKR</a> |
| 7.8   | 1484.6872 | 1.0036 | <a href="#">GTSNSILEEATKR</a> |
| 7.0   | 1484.6768 | 1.0139 | <a href="#">DACGSVMPLKSLK</a> |
| 6.0   | 1484.6789 | 1.0118 | <a href="#">SRLVLHAVSESK</a>  |
| 5.8   | 1485.6843 | 0.0064 | <a href="#">ENVIMFLSDMSGK</a> |
| 5.6   | 1484.6969 | 0.9938 | <a href="#">KYEIEQGSAMWK</a>  |
| 5.3   | 1484.6789 | 1.0118 | <a href="#">SRLVLHAVSESK</a>  |

neutral loss -98, S4 -18  
neutral loss -98, T1 -18  
neutral loss -98, S7 -18

MS2: +2 charge; b and y ions found for S4 [-18]; top ranked score of 35.6; match probability >99%; high confidence in position assignment

Mascot: <http://www.matrixscience.com/>

# **Mascot Search Results**

## Peptide View

MS/MS Fragmentation of **TPGSIDSLYGLQR**

Found in **AT5G03280.1**, | Symbols: EIN2, PIR2, CKR1, ERA3, ORE3, ORE2 | EIN2 (ETHYLENE INSENSITIVE 2); transporter | chr5:788588-793065 FORWARD

Match to Query 2: 1387.789724 from(694.902138,2+)

Title: PR4acn\_grad.4272.4272.2.dta

Data file C:\Users\CooperB\Desktop\Ray\mgfs\MS3special.txt

Click mouse within plot area to zoom in by factor of two about that point

Or,  200 to  Da

Label all possible matches ☐ Label matches used for scoring ☒

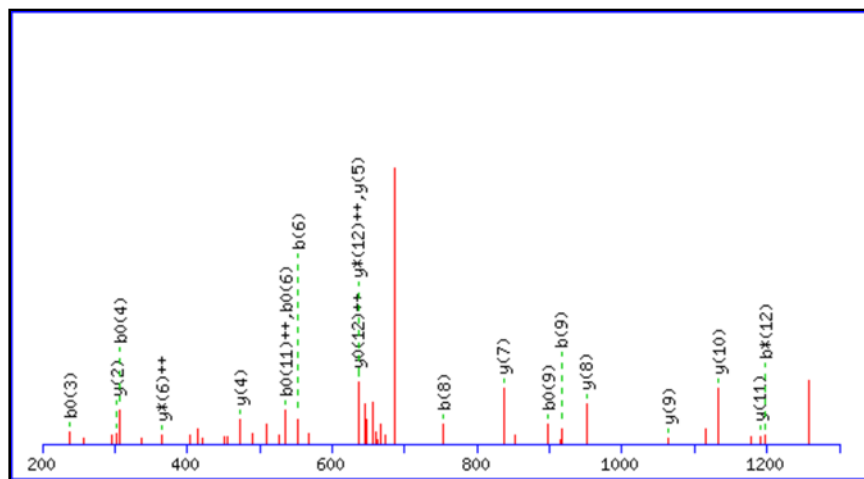

Monoisotopic mass of neutral peptide **Mr(calc)**: 1387.7096

**Fixed modifications:** Carbamidomethyl (C) (apply to specified residues or termini only)

**Variable modifications:**

S4 : Dehydrated (S)

**Ions Score:** 57 **Expect:** 0.0025

**Matches :** 20/110 fragment ions using 30 most intense peaks ([help](#))

| #  | b         | b <sup>++</sup> | b <sup>*</sup> | b <sup>*++</sup> | b <sup>0</sup> | b <sup>0++</sup> | Seq. | y         | y <sup>++</sup> | y <sup>*</sup> | y <sup>*++</sup> | y <sup>0</sup> | y <sup>0++</sup> | #  |
|----|-----------|-----------------|----------------|------------------|----------------|------------------|------|-----------|-----------------|----------------|------------------|----------------|------------------|----|
| 1  | 102.0550  | 51.5311         |                |                  | 84.0444        | 42.5258          | T    |           |                 |                |                  |                |                  | 13 |
| 2  | 199.1077  | 100.0575        |                |                  | 181.0972       | 91.0522          | P    | 1287.6692 | 644.3382        | 1270.6426      | 635.8250         | 1269.6586      | 635.3329         | 12 |
| 3  | 256.1292  | 128.5682        |                |                  | 238.1186       | 119.5629         | G    | 1190.6164 | 595.8118        | 1173.5899      | 587.2986         | 1172.6058      | 586.8066         | 11 |
| 4  | 325.1506  | 163.0790        |                |                  | 307.1401       | 154.0737         | S    | 1133.5949 | 567.3011        | 1116.5684      | 558.7878         | 1115.5844      | 558.2958         | 10 |
| 5  | 438.2347  | 219.6210        |                |                  | 420.2241       | 210.6157         | I    | 1064.5735 | 532.7904        | 1047.5469      | 524.2771         | 1046.5629      | 523.7851         | 9  |
| 6  | 553.2617  | 277.1345        |                |                  | 535.2511       | 268.1292         | D    | 951.4894  | 476.2483        | 934.4629       | 467.7351         | 933.4789       | 467.2431         | 8  |
| 7  | 640.2937  | 320.6505        |                |                  | 622.2831       | 311.6452         | S    | 836.4625  | 418.7349        | 819.4359       | 410.2216         | 818.4519       | 409.7296         | 7  |
| 8  | 753.3777  | 377.1925        |                |                  | 735.3672       | 368.1872         | L    | 749.4305  | 375.2189        | 732.4039       | 366.7056         |                |                  | 6  |
| 9  | 916.4411  | 458.7242        |                |                  | 898.4305       | 449.7189         | Y    | 636.3464  | 318.6768        | 619.3198       | 310.1636         |                |                  | 5  |
| 10 | 973.4625  | 487.2349        |                |                  | 955.4520       | 478.2296         | G    | 473.2831  | 237.1452        | 456.2565       | 228.6319         |                |                  | 4  |
| 11 | 1086.5466 | 543.7769        |                |                  | 1068.5360      | 534.7717         | L    | 416.2616  | 208.6344        | 399.2350       | 200.1212         |                |                  | 3  |
| 12 | 1214.6052 | 607.8062        | 1197.5786      | 599.2930         | 1196.5946      | 598.8009         | Q    | 303.1775  | 152.0924        | 286.1510       | 143.5791         |                |                  | 2  |
| 13 |           |                 |                |                  |                |                  | R    | 175.1190  | 88.0631         | 158.0924       | 79.5498          |                |                  | 1  |

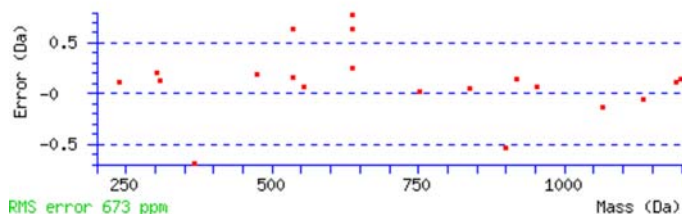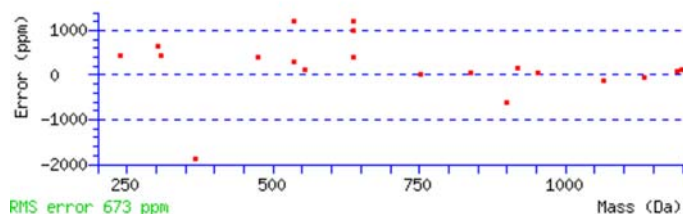

NCBI BLAST search of [TPGSIDSLYGLQR](#)

(Parameters: blastp, nr protein database, expect=20000, no filter, PAM30)

Other BLAST [web gateways](#)

All matches to this query

| Score | Mr(calc): | Delta   | Sequence                       |
|-------|-----------|---------|--------------------------------|
| 57.3  | 1387.7096 | 0.0801  | <a href="#">TPGSIDSLYGLQR</a>  |
| 36.8  | 1387.7096 | 0.0801  | <a href="#">TPGSIDSLYGLQR</a>  |
| 19.4  | 1387.7096 | 0.0801  | <a href="#">TPGSIDSLYGLQR</a>  |
| 17.1  | 1386.4619 | 1.3278  | <a href="#">SSSLSGSSSTRK</a>   |
| 16.1  | 1386.4619 | 1.3278  | <a href="#">SSSLSGSSSTRK</a>   |
| 16.1  | 1386.4619 | 1.3278  | <a href="#">SSSLSGSSSTRK</a>   |
| 16.1  | 1386.4619 | 1.3278  | <a href="#">SSSLSGSSSTRK</a>   |
| 15.8  | 1388.5624 | -0.7727 | <a href="#">SSSVSPTTSGSQHR</a> |
| 15.8  | 1388.5624 | -0.7727 | <a href="#">SSSVSPTTSGSQHR</a> |
| 15.8  | 1388.5624 | -0.7727 | <a href="#">SSSVSPTTSGSQHR</a> |

S4 -18  
T1 -18  
S7 -18

MS3: -98 Da  
triggered  
consecutive  
spectrum; top  
position  
assignment is  
same as in MS2; y  
ion found for S4  
[-18]

Mascot: <http://www.matrixscience.com/>
