# Supplementary material for: Proteomic responses in Arabidopsis thaliana seedlings treated with ethylene
Source: Royal Society of Chemistry journal article supplement (doi:10.1039/c1mb05159h), 2011-06-29
Supplement: c1mb05159h.zip [file c1mb05159h.zip]

**Mascot Search Results****Peptide View**MS/MS Fragmentation of **MSGQESHDISSGGEQAGVDHPPPR**Found in **AT5G64330.1** | Symbols: JK218, RPT3, NPH3 | NPH3 (NON-PHOTOTROPIC HYPOCOTYL 3); signal transducer | chr5:25744794-25747451 FORWARD

Match to Query 18: 2651.019723 from(884.680517,3+)

Title: PR1100\_%.Salt.2749.2749.3.dta

Data file C:\Users\CooperB\Desktop\Ray\mgfs\MS2special.txt

Click mouse within plot area to zoom in by factor of two about that point

Or,  300  1800  Label all possible matches ☐ Label matches used for scoring ☒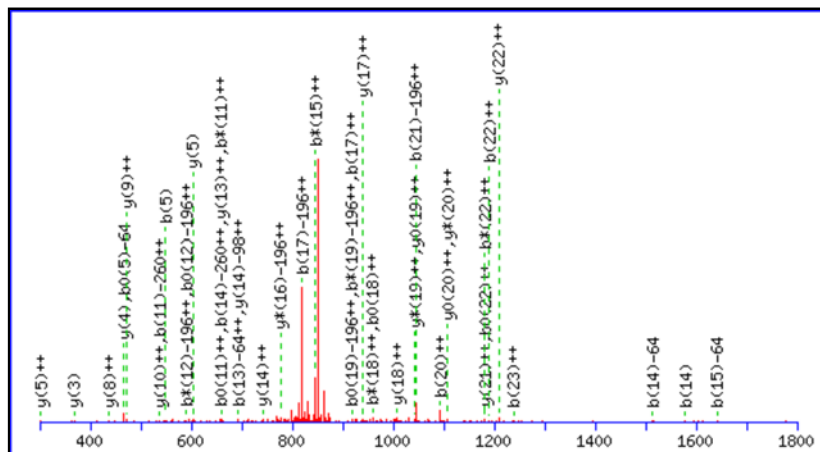

Monoisotopic mass of neutral peptide Mr(calc): 2650.0156

Fixed modifications: Carbamidomethyl (C) (apply to specified residues or termini only)

Variable modifications:

M1 : Oxidation (M), with neutral losses 0.0000(shown in table), 63.9983

S10 : Phospho (ST), with neutral losses 0.0000(shown in table), 97.9769

S11 : Phospho (ST), with neutral losses 0.0000(shown in table), 97.9769

Ions Score: 27 Expect: 0.045

Matches : 44/616 fragment ions using 57 most intense peaks ([help](#))

| #  | b         | b <sup>++</sup> | b <sup>*</sup> | b <sup>*++</sup> | b <sup>0</sup> | b <sup>0++</sup> | Seq. | y         | y <sup>++</sup> | y <sup>*</sup> | y <sup>*++</sup> | y <sup>0</sup> | y <sup>0++</sup> | #  |
|----|-----------|-----------------|----------------|------------------|----------------|------------------|------|-----------|-----------------|----------------|------------------|----------------|------------------|----|
| 1  | 148.0427  | 74.5250         |                |                  |                |                  | M    |           |                 |                |                  |                |                  | 24 |
| 2  | 235.0747  | 118.0410        |                |                  | 217.0641       | 109.0357         | S    | 2503.9875 | 1252.4974       | 2486.9610      | 1243.9841        | 2485.9770      | 1243.4921        | 23 |
| 3  | 292.0962  | 146.5517        |                |                  | 274.0856       | 137.5464         | G    | 2416.9555 | 1208.9814       | 2399.9289      | 1200.4681        | 2398.9449      | 1199.9761        | 22 |
| 4  | 420.1547  | 210.5810        | 403.1282       | 202.0677         | 402.1442       | 201.5757         | Q    | 2359.9340 | 1180.4707       | 2342.9075      | 1171.9574        | 2341.9235      | 1171.4654        | 21 |
| 5  | 549.1973  | 275.1023        | 532.1708       | 266.5890         | 531.1868       | 266.0970         | E    | 2231.8754 | 1116.4414       | 2214.8489      | 1107.9281        | 2213.8649      | 1107.4361        | 20 |
| 6  | 636.2294  | 318.6183        | 619.2028       | 310.1050         | 618.2188       | 309.6130         | S    | 2102.8329 | 1051.9201       | 2085.8063      | 1043.4068        | 2084.8223      | 1042.9148        | 19 |
| 7  | 773.2883  | 387.1478        | 756.2617       | 378.6345         | 755.2777       | 378.1425         | H    | 2015.8008 | 1008.4041       | 1998.7743      | 999.8908         | 1997.7903      | 999.3988         | 18 |
| 8  | 888.3152  | 444.6612        | 871.2887       | 436.1480         | 870.3047       | 435.6560         | D    | 1878.7419 | 939.8746        | 1861.7154      | 931.3613         | 1860.7314      | 930.8693         | 17 |
| 9  | 1001.3993 | 501.2033        | 984.3727       | 492.6900         | 983.3887       | 492.1980         | I    | 1763.7150 | 882.3611        | 1746.6884      | 873.8478         | 1745.7044      | 873.3558         | 16 |
| 10 | 1168.3976 | 584.7025        | 1151.3711      | 576.1892         | 1150.3871      | 575.6972         | S    | 1650.6309 | 825.8191        | 1633.6044      | 817.3058         | 1632.6203      | 816.8138         | 15 |
| 11 | 1335.3960 | 668.2016        | 1318.3695      | 659.6884         | 1317.3854      | 659.1964         | S    | 1483.6325 | 742.3199        | 1466.6060      | 733.8066         | 1465.6220      | 733.3146         | 14 |
| 12 | 1392.4175 | 696.7124        | 1375.3909      | 688.1991         | 1374.4069      | 687.7071         | G    | 1316.6342 | 658.8207        | 1299.6076      | 650.3075         | 1298.6236      | 649.8155         | 13 |
| 13 | 1449.4389 | 725.2231        | 1432.4124      | 716.7098         | 1431.4284      | 716.2178         | G    | 1259.6127 | 630.3100        | 1242.5862      | 621.7967         | 1241.6022      | 621.3047         | 12 |
| 14 | 1578.4815 | 789.7444        | 1561.4550      | 781.2311         | 1560.4710      | 780.7391         | E    | 1202.5913 | 601.7993        | 1185.5647      | 593.2860         | 1184.5807      | 592.7940         | 11 |
| 15 | 1706.5401 | 853.7737        | 1689.5136      | 845.2604         | 1688.5295      | 844.7684         | Q    | 1073.5487 | 537.2780        | 1056.5221      | 528.7647         | 1055.5381      | 528.2727         | 10 |
| 16 | 1777.5772 | 889.2922        | 1760.5507      | 880.7790         | 1759.5667      | 880.2870         | A    | 945.4901  | 473.2487        | 928.4635       | 464.7354         | 927.4795       | 464.2434         | 9  |
| 17 | 1834.5987 | 917.8030        | 1817.5721      | 909.2897         | 1816.5881      | 908.7977         | G    | 874.4530  | 437.7301        | 857.4264       | 429.2169         | 856.4424       | 428.7248         | 8  |
| 18 | 1933.6671 | 967.3372        | 1916.6405      | 958.8239         | 1915.6565      | 958.3319         | V    | 817.4315  | 409.2194        | 800.4050       | 400.7061         | 799.4209       | 400.2141         | 7  |
| 19 | 2048.6940 | 1024.8507       | 2031.6675      | 1016.3374        | 2030.6835      | 1015.8454        | D    | 718.3631  | 359.6852        | 701.3366       | 351.1719         | 700.3525       | 350.6799         | 6  |
| 20 | 2185.7530 | 1093.3801       | 2168.7264      | 1084.8668        | 2167.7424      | 1084.3748        | H    | 603.3362  | 302.1717        | 586.3096       | 293.6584         |                |                  | 5  |

|    |           |           |           |           |           |           |   |          |          |          |          |  |  |   |
|----|-----------|-----------|-----------|-----------|-----------|-----------|---|----------|----------|----------|----------|--|--|---|
| 21 | 2282.8057 | 1141.9065 | 2265.7792 | 1133.3932 | 2264.7951 | 1132.9012 | P | 466.2772 | 233.6423 | 449.2507 | 225.1290 |  |  | 4 |
| 22 | 2379.8585 | 1190.4329 | 2362.8319 | 1181.9196 | 2361.8479 | 1181.4276 | P | 369.2245 | 185.1159 | 352.1979 | 176.6026 |  |  | 3 |
| 23 | 2476.9112 | 1238.9593 | 2459.8847 | 1230.4460 | 2458.9007 | 1229.9540 | P | 272.1717 | 136.5895 | 255.1452 | 128.0762 |  |  | 2 |
| 24 |           |           |           |           |           |           | R | 175.1190 | 88.0631  | 158.0924 | 79.5498  |  |  | 1 |

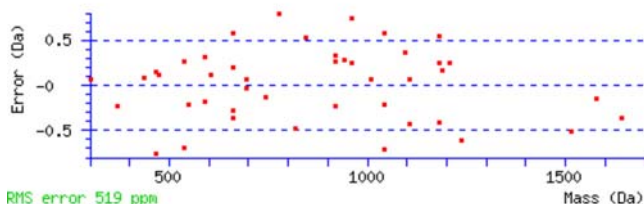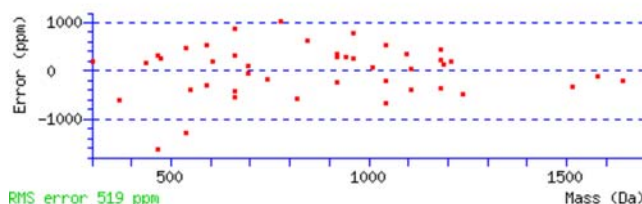

NCBI **BLAST** search of [MSGQESHDISSGGEQAGVDHPPPR](#)  
 (Parameters: blastp, nr protein database, expect=20000, no filter, PAM30)  
 Other BLAST [web gateways](#)

All matches to this query

| Score | Mr(calc): | Delta   | Sequence                                 |
|-------|-----------|---------|------------------------------------------|
| 26.7  | 2650.0156 | 1.0041  | <a href="#">MSGQESHDISSGGEQAGVDHPPPR</a> |
| 26.2  | 2650.0156 | 1.0041  | <a href="#">MSGQESHDISSGGEQAGVDHPPPR</a> |
| 22.2  | 2650.0156 | 1.0041  | <a href="#">MSGQESHDISSGGEQAGVDHPPPR</a> |
| 17.1  | 2650.0156 | 1.0041  | <a href="#">MSGQESHDISSGGEQAGVDHPPPR</a> |
| 6.0   | 2650.0156 | 1.0041  | <a href="#">MSGQESHDISSGGEQAGVDHPPPR</a> |
| 5.5   | 2651.0345 | -0.0148 | <a href="#">MVRSNCTNVGAVVMADVQSVSR</a>   |
| 5.1   | 2649.9900 | 1.0297  | <a href="#">HNCLSLSGSAEEICSSDCSHLK</a>   |
| 5.1   | 2649.9900 | 1.0297  | <a href="#">HNCLSLSGSAEEICSSDCSHLK</a>   |
| 4.0   | 2650.0424 | 0.9773  | <a href="#">ETGASVMTKLPFTGTGTEQGQDR</a>  |
| 3.5   | 2650.0022 | 1.0175  | <a href="#">ESGKSSVLM DIKPWDDETDMK</a>   |

no -98 neutral loss, S10 S11 +80  
 no -98 neutral loss, S2, S6 +80  
 no -98 neutral loss, S6, S10 +80  
 no -98 neutral loss, S6, S11 +80  
 -98 neutral loss, S2, S11 -18

MS2: Top score 26.7 with probability of match 95% but 2nd best score similar. S10 [+80] and S11 [+80] are deduced, but +3 charge and supporting MS3 with site determining ion for S10 [-18]. High position confidence.

Mascot: <http://www.matrixscience.com/>

**Mascot Search Results****Peptide View**MS/MS Fragmentation of **MSGQESHDISSGGEQAGVDHPPPR**Found in **AT5G64330.1** | Symbols: JK218, RPT3, NPH3 | NPH3 (NON-PHOTOTROPIC HYPOCOTYL 3); signal transducer | chr5:25744794-25747451 FORWARD

Match to Query 8: 2552.874723 from(851.965517,3+)

Title: PR1100\_%\_Salt.2750.2750.3.dta

Data file C:\Users\CooperB\Desktop\Ray\mgfs\MS3special.txt

Click mouse within plot area to zoom in by factor of two about that point

Or, Plot from 200 to 1400 Da Full range

Label all possible matches ☐ Label matches used for scoring ☒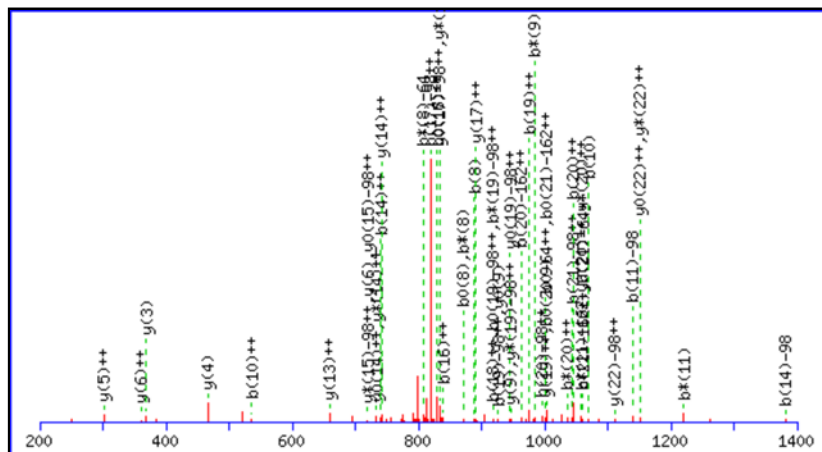

Monoisotopic mass of neutral peptide Mr(calc): 2552.0388

Fixed modifications: Carbamidomethyl (C) (apply to specified residues or termini only)

Variable modifications:

M1 : Oxidation (M), with neutral losses 0.0000(shown in table), 63.9983

S10 : Dehydrated (S)

S11 : Phospho (ST), with neutral losses 0.0000(shown in table), 97.9769

Ions Score: 29 Expect: 3.2

Matches : 55/604 fragment ions using 56 most intense peaks ([help](#))

| #  | b         | b <sup>++</sup> | b <sup>*</sup> | b <sup>*++</sup> | b <sup>0</sup> | b <sup>0++</sup> | Seq. | y         | y <sup>++</sup> | y <sup>*</sup> | y <sup>*++</sup> | y <sup>0</sup> | y <sup>0++</sup> | #  |
|----|-----------|-----------------|----------------|------------------|----------------|------------------|------|-----------|-----------------|----------------|------------------|----------------|------------------|----|
| 1  | 148.0427  | 74.5250         |                |                  |                |                  | M    |           |                 |                |                  |                |                  | 24 |
| 2  | 235.0747  | 118.0410        |                |                  | 217.0641       | 109.0357         | S    | 2406.0106 | 1203.5089       | 2388.9841      | 1194.9957        | 2388.0001      | 1194.5037        | 23 |
| 3  | 292.0962  | 146.5517        |                |                  | 274.0856       | 137.5464         | G    | 2318.9786 | 1159.9929       | 2301.9520      | 1151.4797        | 2300.9680      | 1150.9877        | 22 |
| 4  | 420.1547  | 210.5810        | 403.1282       | 202.0677         | 402.1442       | 201.5757         | Q    | 2261.9571 | 1131.4822       | 2244.9306      | 1122.9689        | 2243.9466      | 1122.4769        | 21 |
| 5  | 549.1973  | 275.1023        | 532.1708       | 266.5890         | 531.1868       | 266.0970         | E    | 2133.8986 | 1067.4529       | 2116.8720      | 1058.9396        | 2115.8880      | 1058.4476        | 20 |
| 6  | 636.2294  | 318.6183        | 619.2028       | 310.1050         | 618.2188       | 309.6130         | S    | 2004.8560 | 1002.9316       | 1987.8294      | 994.4183         | 1986.8454      | 993.9263         | 19 |
| 7  | 773.2883  | 387.1478        | 756.2617       | 378.6345         | 755.2777       | 378.1425         | H    | 1917.8239 | 959.4156        | 1900.7974      | 950.9023         | 1899.8134      | 950.4103         | 18 |
| 8  | 888.3152  | 444.6612        | 871.2887       | 436.1480         | 870.3047       | 435.6560         | D    | 1780.7650 | 890.8861        | 1763.7385      | 882.3729         | 1762.7545      | 881.8809         | 17 |
| 9  | 1001.3993 | 501.2033        | 984.3727       | 492.6900         | 983.3887       | 492.1980         | I    | 1665.7381 | 833.3727        | 1648.7115      | 824.8594         | 1647.7275      | 824.3674         | 16 |
| 10 | 1070.4207 | 535.7140        | 1053.3942      | 527.2007         | 1052.4102      | 526.7087         | S    | 1552.6540 | 776.8306        | 1535.6275      | 768.3174         | 1534.6434      | 767.8254         | 15 |
| 11 | 1237.4191 | 619.2132        | 1220.3926      | 610.6999         | 1219.4085      | 610.2079         | S    | 1483.6325 | 742.3199        | 1466.6060      | 733.8066         | 1465.6220      | 733.3146         | 14 |
| 12 | 1294.4406 | 647.7239        | 1277.4140      | 639.2106         | 1276.4300      | 638.7186         | G    | 1316.6342 | 658.8207        | 1299.6076      | 650.3075         | 1298.6236      | 649.8155         | 13 |
| 13 | 1351.4620 | 676.2347        | 1334.4355      | 667.7214         | 1333.4515      | 667.2294         | G    | 1259.6127 | 630.3100        | 1242.5862      | 621.7967         | 1241.6022      | 621.3047         | 12 |
| 14 | 1480.5046 | 740.7560        | 1463.4781      | 732.2427         | 1462.4941      | 731.7507         | E    | 1202.5913 | 601.7993        | 1185.5647      | 593.2860         | 1184.5807      | 592.7940         | 11 |
| 15 | 1608.5632 | 804.7852        | 1591.5367      | 796.2720         | 1590.5526      | 795.7800         | Q    | 1073.5487 | 537.2780        | 1056.5221      | 528.7647         | 1055.5381      | 528.2727         | 10 |
| 16 | 1679.6003 | 840.3038        | 1662.5738      | 831.7905         | 1661.5898      | 831.2985         | A    | 945.4901  | 473.2487        | 928.4635       | 464.7354         | 927.4795       | 464.2434         | 9  |
| 17 | 1736.6218 | 868.8145        | 1719.5952      | 860.3013         | 1718.6112      | 859.8092         | G    | 874.4530  | 437.7301        | 857.4264       | 429.2169         | 856.4424       | 428.7248         | 8  |
| 18 | 1835.6902 | 918.3487        | 1818.6637      | 909.8355         | 1817.6796      | 909.3435         | V    | 817.4315  | 409.2194        | 800.4050       | 400.7061         | 799.4209       | 400.2141         | 7  |
| 19 | 1950.7171 | 975.8622        | 1933.6906      | 967.3489         | 1932.7066      | 966.8569         | D    | 718.3631  | 359.6852        | 701.3366       | 351.1719         | 700.3525       | 350.6799         | 6  |
| 20 | 2087.7761 | 1044.3917       | 2070.7495      | 1035.8784        | 2069.7655      | 1035.3864        | H    | 603.3362  | 302.1717        | 586.3096       | 293.6584         |                |                  | 5  |

|    |           |           |           |           |           |           |   |          |          |          |          |  |  |   |
|----|-----------|-----------|-----------|-----------|-----------|-----------|---|----------|----------|----------|----------|--|--|---|
| 21 | 2184.8288 | 1092.9180 | 2167.8023 | 1084.4048 | 2166.8183 | 1083.9128 | P | 466.2772 | 233.6423 | 449.2507 | 225.1290 |  |  | 4 |
| 22 | 2281.8816 | 1141.4444 | 2264.8550 | 1132.9312 | 2263.8710 | 1132.4391 | P | 369.2245 | 185.1159 | 352.1979 | 176.6026 |  |  | 3 |
| 23 | 2378.9343 | 1189.9708 | 2361.9078 | 1181.4575 | 2360.9238 | 1180.9655 | P | 272.1717 | 136.5895 | 255.1452 | 128.0762 |  |  | 2 |
| 24 |           |           |           |           |           |           | R | 175.1190 | 88.0631  | 158.0924 | 79.5498  |  |  | 1 |

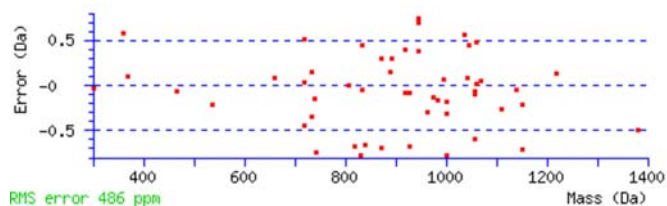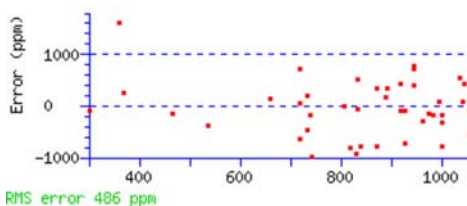

MS3: -98 Da triggered corroborating spectrum. Top match with positioning supports S10 and S11 as being phosphorylated. b ion for S10 [-18], S11 [+80] deduced.

NCBI **BLAST** search of [MSGQESHDISSGGEQAGVDHPPPR](#)  
 (Parameters: blastp, nr protein database, expect=20000, no filter, PAM30)  
 Other BLAST [web gateways](#)

All matches to this query

| Score | Mr(calc): | Delta   | Sequence                                 |
|-------|-----------|---------|------------------------------------------|
| 29.2  | 2552.0388 | 0.8359  | <a href="#">MSGQESHDISSGGEQAGVDHPPPR</a> |
| 24.2  | 2552.3378 | 0.5370  | <a href="#">RGHSQTTLHAISALLSLPTSVL</a>   |
| 23.2  | 2552.0388 | 0.8359  | <a href="#">MSGQESHDISSGGEQAGVDHPPPR</a> |
| 23.2  | 2552.0388 | 0.8359  | <a href="#">MSGQESHDISSGGEQAGVDHPPPR</a> |
| 22.2  | 2552.0388 | 0.8359  | <a href="#">MSGQESHDISSGGEQAGVDHPPPR</a> |
| 22.1  | 2553.0447 | -0.1700 | <a href="#">NSNAVTVSETSTMANQMVLKK</a>    |
| 22.1  | 2553.0447 | -0.1700 | <a href="#">NSNAVTVSETSTMANQMVLKK</a>    |
| 22.1  | 2553.0447 | -0.1700 | <a href="#">NSNAVTVSETSTMANQMVLKK</a>    |
| 22.0  | 2551.9134 | 0.9613  | <a href="#">VAATKAVQTQTFHCSSGDDPL</a>    |
| 21.7  | 2554.0278 | -1.1531 | <a href="#">LEPGGPSTSSSTEEVSGQSGKLAK</a> |

S10 [-18]; no -98 neutral loss, S11 [+80]

Mascot: <http://www.matrixscience.com/>
