# Supplementary material for: Proteomic responses in Arabidopsis thaliana seedlings treated with ethylene
Source: Royal Society of Chemistry journal article supplement (doi:10.1039/c1mb05159h), 2011-06-29
Supplement: c1mb05159h.zip [file c1mb05159h.zip]

**Mascot Search Results****Peptide View**MS/MS Fragmentation of **AAPTSNFTVGSDGPPSFR**Found in **AT5G03280.1**, | Symbols: EIN2, PIR2, CKR1, ERA3, ORE3, ORE2 | EIN2 (ETHYLENE INSENSITIVE 2); transporter | chr5:788588-793065 FORWARD

Match to Query 11: 1886.822364 from(944.418458,2+)

Title: PR3acn\_grad.4061.4061.2.dta

Data file C:\Users\CooperB\Desktop\Ray\mgfs\MS2special.txt

Click mouse within plot area to zoom in by factor of two about that point

Or,  200 to 1800 Da Label all possible matches ☐ Label matches used for scoring ☒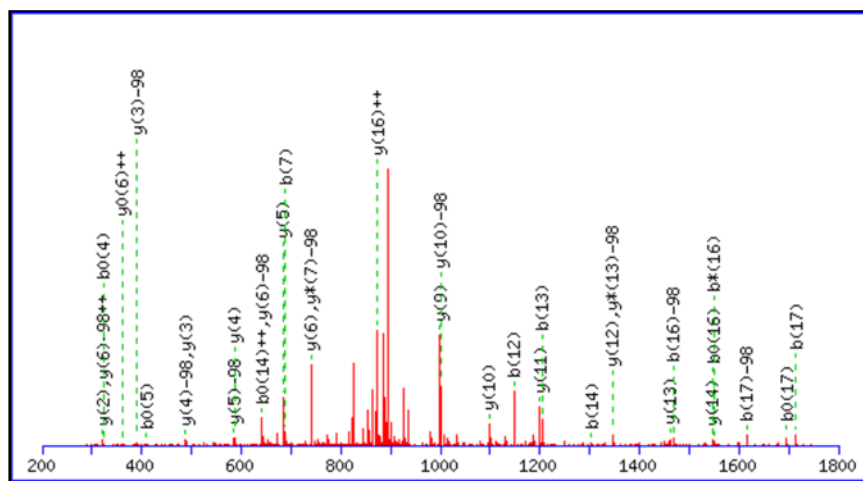

Monoisotopic mass of neutral peptide Mr(calc): 1886.8200

Fixed modifications: Carbamidomethyl (C) (apply to specified residues or termini only)

Variable modifications:

S16 : Phospho (ST), with neutral losses 0.0000(shown in table), 97.9769

Ions Score: 73 Expect: 1.6e-006

Matches : 34/286 fragment ions using 45 most intense peaks ([help](#))

| #  | b         | b <sup>++</sup> | b <sup>*</sup> | b <sup>*++</sup> | b <sup>0</sup> | b <sup>0++</sup> | Seq. | y         | y <sup>++</sup> | y <sup>*</sup> | y <sup>*++</sup> | y <sup>0</sup> | y <sup>0++</sup> | #  |
|----|-----------|-----------------|----------------|------------------|----------------|------------------|------|-----------|-----------------|----------------|------------------|----------------|------------------|----|
| 1  | 72.0444   | 36.5258         |                |                  |                |                  | A    |           |                 |                |                  |                |                  | 18 |
| 2  | 143.0815  | 72.0444         |                |                  |                |                  | A    | 1816.7902 | 908.8987        | 1799.7636      | 900.3854         | 1798.7796      | 899.8934         | 17 |
| 3  | 240.1343  | 120.5708        |                |                  |                |                  | P    | 1745.7531 | 873.3802        | 1728.7265      | 864.8669         | 1727.7425      | 864.3749         | 16 |
| 4  | 341.1819  | 171.0946        |                |                  | 323.1714       | 162.0893         | T    | 1648.7003 | 824.8538        | 1631.6737      | 816.3405         | 1630.6897      | 815.8485         | 15 |
| 5  | 428.2140  | 214.6106        |                |                  | 410.2034       | 205.6053         | S    | 1547.6526 | 774.3299        | 1530.6261      | 765.8167         | 1529.6420      | 765.3247         | 14 |
| 6  | 542.2569  | 271.6321        | 525.2304       | 263.1188         | 524.2463       | 262.6268         | N    | 1460.6206 | 730.8139        | 1443.5940      | 722.3007         | 1442.6100      | 721.8086         | 13 |
| 7  | 689.3253  | 345.1663        | 672.2988       | 336.6530         | 671.3148       | 336.1610         | F    | 1346.5777 | 673.7925        | 1329.5511      | 665.2792         | 1328.5671      | 664.7872         | 12 |
| 8  | 790.3730  | 395.6901        | 773.3464       | 387.1769         | 772.3624       | 386.6849         | T    | 1199.5092 | 600.2583        | 1182.4827      | 591.7450         | 1181.4987      | 591.2530         | 11 |
| 9  | 889.4414  | 445.2243        | 872.4149       | 436.7111         | 871.4308       | 436.2191         | V    | 1098.4616 | 549.7344        | 1081.4350      | 541.2211         | 1080.4510      | 540.7291         | 10 |
| 10 | 946.4629  | 473.7351        | 929.4363       | 465.2218         | 928.4523       | 464.7298         | G    | 999.3932  | 500.2002        | 982.3666       | 491.6869         | 981.3826       | 491.1949         | 9  |
| 11 | 1033.4949 | 517.2511        | 1016.4684      | 508.7378         | 1015.4843      | 508.2458         | S    | 942.3717  | 471.6895        | 925.3451       | 463.1762         | 924.3611       | 462.6842         | 8  |
| 12 | 1148.5218 | 574.7646        | 1131.4953      | 566.2513         | 1130.5113      | 565.7593         | D    | 855.3397  | 428.1735        | 838.3131       | 419.6602         | 837.3291       | 419.1682         | 7  |
| 13 | 1205.5433 | 603.2753        | 1188.5168      | 594.7620         | 1187.5327      | 594.2700         | G    | 740.3127  | 370.6600        | 723.2862       | 362.1467         | 722.3022       | 361.6547         | 6  |
| 14 | 1302.5961 | 651.8017        | 1285.5695      | 643.2884         | 1284.5855      | 642.7964         | P    | 683.2913  | 342.1493        | 666.2647       | 333.6360         | 665.2807       | 333.1440         | 5  |
| 15 | 1399.6488 | 700.3281        | 1382.6223      | 691.8148         | 1381.6383      | 691.3228         | P    | 586.2385  | 293.6229        | 569.2119       | 285.1096         | 568.2279       | 284.6176         | 4  |
| 16 | 1566.6472 | 783.8272        | 1549.6206      | 775.3140         | 1548.6366      | 774.8220         | S    | 489.1857  | 245.0965        | 472.1592       | 236.5832         | 471.1752       | 236.0912         | 3  |
| 17 | 1713.7156 | 857.3614        | 1696.6891      | 848.8482         | 1695.7050      | 848.3562         | F    | 322.1874  | 161.5973        | 305.1608       | 153.0840         |                |                  | 2  |
| 18 |           |                 |                |                  |                |                  | R    | 175.1190  | 88.0631         | 158.0924       | 79.5498          |                |                  | 1  |

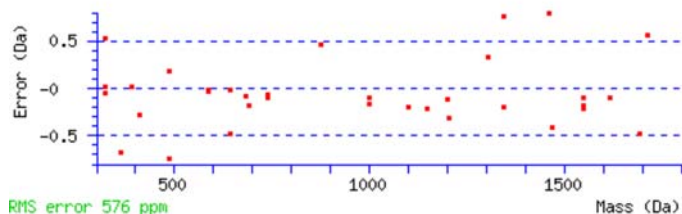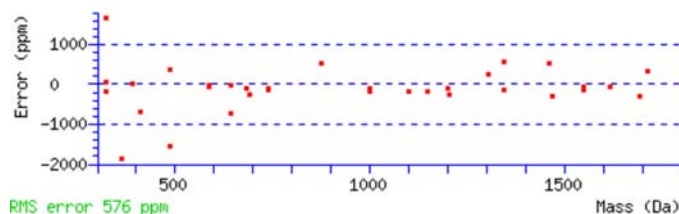

NCBI BLAST search of [AAPTSNFTVGSDGPPSFR](#)

(Parameters: blastp, nr protein database, expect=20000, no filter, PAM30)

Other BLAST [web gateways](#)

All matches to this query

| Score | Mr(calc): | Delta   | Sequence                            |
|-------|-----------|---------|-------------------------------------|
| 73.0  | 1886.8200 | 0.0023  | <a href="#">AAPTSNFTVGSDGPPSFR</a>  |
| 41.6  | 1886.8200 | 0.0023  | <a href="#">AAPTSNFTVGSDGPPSFR</a>  |
| 34.1  | 1886.8200 | 0.0023  | <a href="#">AAPTSNFTVGSDGPPSFR</a>  |
| 28.4  | 1886.8200 | 0.0023  | <a href="#">AAPTSNFTVGSDGPPSFR</a>  |
| 23.6  | 1886.8200 | 0.0023  | <a href="#">AAPTSNFTVGSDGPPSFR</a>  |
| 18.5  | 1886.8362 | -0.0139 | <a href="#">SQLLSTPLMAVNSNPR</a>    |
| 9.7   | 1886.8128 | 0.0095  | <a href="#">MVGGGAPQRGSAAATASMR</a> |
| 9.7   | 1886.8128 | 0.0095  | <a href="#">MVGGGAPQRGSAAATASMR</a> |
| 7.8   | 1886.8128 | 0.0095  | <a href="#">MVGGGAPQRGSAAATASMR</a> |
| 7.2   | 1886.8274 | -0.0050 | <a href="#">IEFSNSDMTKFAVFR</a>     |

no -98 loss, S16 +80  
 -98 loss, S11 -18  
 -98 loss, T8 -18  
 -98 loss, T4 -18  
 -98 loss, S5 -18

MS2: high score of 73 and match probability greater than 99%. +2 charge; y ion found for S16 [+80]. Corroborating MS3. High position confidence.

Mascot: <http://www.matrixscience.com/>

# Mascot Search Results

## Peptide View

MS/MS Fragmentation of **AAPTSNFTVGSDGPPSFR**

Found in **AT5G03280.1**, | Symbols: EIN2, PIR2, CKR1, ERA3, ORE3, ORE2 | EIN2 (ETHYLENE INSENSITIVE 2); transporter | chr5:788588-793065 FORWARD

Match to Query 5: 1789.922724 from(895.968638,2+)

Title: PR3acn\_grad.4062.4062.2.dta

Data file C:\Users\CooperB\Desktop\Ray\mgfs\MS3special.txt

Click mouse within plot area to zoom in by factor of two about that point

Or,  300 to 1700 Da

Label all possible matches ☐ Label matches used for scoring ☒

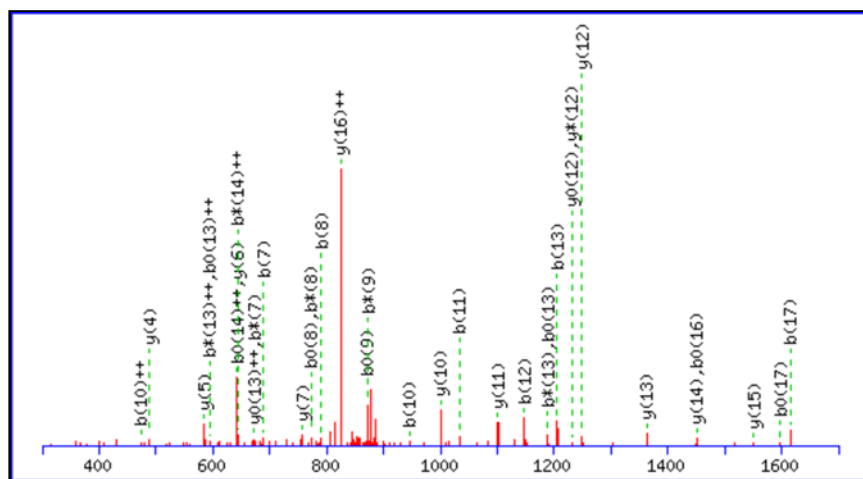

Monoisotopic mass of neutral peptide Mr(calc): 1788.8432

Fixed modifications: Carbamidomethyl (C) (apply to specified residues or termini only)

Variable modifications:

S16 : Dehydrated (S)

Ions Score: 65 Expect: 0.00065

Matches : 35/184 fragment ions using 48 most intense peaks ([help](#))

| #  | b         | b <sup>++</sup> | b <sup>*</sup> | b <sup>*++</sup> | b <sup>0</sup> | b <sup>0++</sup> | Seq. | y         | y <sup>++</sup> | y <sup>*</sup> | y <sup>*++</sup> | y <sup>0</sup> | y <sup>0++</sup> | #  |
|----|-----------|-----------------|----------------|------------------|----------------|------------------|------|-----------|-----------------|----------------|------------------|----------------|------------------|----|
| 1  | 72.0444   | 36.5258         |                |                  |                |                  | A    |           |                 |                |                  |                |                  | 18 |
| 2  | 143.0815  | 72.0444         |                |                  |                |                  | A    | 1718.8133 | 859.9103        | 1701.7867      | 851.3970         | 1700.8027      | 850.9050         | 17 |
| 3  | 240.1343  | 120.5708        |                |                  |                |                  | P    | 1647.7762 | 824.3917        | 1630.7496      | 815.8784         | 1629.7656      | 815.3864         | 16 |
| 4  | 341.1819  | 171.0946        |                |                  | 323.1714       | 162.0893         | T    | 1550.7234 | 775.8653        | 1533.6968      | 767.3521         | 1532.7128      | 766.8601         | 15 |
| 5  | 428.2140  | 214.6106        |                |                  | 410.2034       | 205.6053         | S    | 1449.6757 | 725.3415        | 1432.6492      | 716.8282         | 1431.6652      | 716.3362         | 14 |
| 6  | 542.2569  | 271.6321        | 525.2304       | 263.1188         | 524.2463       | 262.6268         | N    | 1362.6437 | 681.8255        | 1345.6171      | 673.3122         | 1344.6331      | 672.8202         | 13 |
| 7  | 689.3253  | 345.1663        | 672.2988       | 336.6530         | 671.3148       | 336.1610         | F    | 1248.6008 | 624.8040        | 1231.5742      | 616.2907         | 1230.5902      | 615.7987         | 12 |
| 8  | 790.3730  | 395.6901        | 773.3464       | 387.1769         | 772.3624       | 386.6849         | T    | 1101.5323 | 551.2698        | 1084.5058      | 542.7565         | 1083.5218      | 542.2645         | 11 |
| 9  | 889.4414  | 445.2243        | 872.4149       | 436.7111         | 871.4308       | 436.2191         | V    | 1000.4847 | 500.7460        | 983.4581       | 492.2327         | 982.4741       | 491.7407         | 10 |
| 10 | 946.4629  | 473.7351        | 929.4363       | 465.2218         | 928.4523       | 464.7298         | G    | 901.4163  | 451.2118        | 884.3897       | 442.6985         | 883.4057       | 442.2065         | 9  |
| 11 | 1033.4949 | 517.2511        | 1016.4684      | 508.7378         | 1015.4843      | 508.2458         | S    | 844.3948  | 422.7010        | 827.3682       | 414.1878         | 826.3842       | 413.6958         | 8  |
| 12 | 1148.5218 | 574.7646        | 1131.4953      | 566.2513         | 1130.5113      | 565.7593         | D    | 757.3628  | 379.1850        | 740.3362       | 370.6717         | 739.3522       | 370.1797         | 7  |
| 13 | 1205.5433 | 603.2753        | 1188.5168      | 594.7620         | 1187.5327      | 594.2700         | G    | 642.3358  | 321.6715        | 625.3093       | 313.1583         | 624.3253       | 312.6663         | 6  |
| 14 | 1302.5961 | 651.8017        | 1285.5695      | 643.2884         | 1284.5855      | 642.7964         | P    | 585.3144  | 293.1608        | 568.2878       | 284.6475         | 567.3038       | 284.1555         | 5  |
| 15 | 1399.6488 | 700.3281        | 1382.6223      | 691.8148         | 1381.6383      | 691.3228         | P    | 488.2616  | 244.6344        | 471.2350       | 236.1212         | 470.2510       | 235.6292         | 4  |
| 16 | 1468.6703 | 734.8388        | 1451.6438      | 726.3255         | 1450.6597      | 725.8335         | S    | 391.2088  | 196.1081        | 374.1823       | 187.5948         | 373.1983       | 187.1028         | 3  |
| 17 | 1615.7387 | 808.3730        | 1598.7122      | 799.8597         | 1597.7281      | 799.3677         | F    | 322.1874  | 161.5973        | 305.1608       | 153.0840         |                |                  | 2  |
| 18 |           |                 |                |                  |                |                  | R    | 175.1190  | 88.0631         | 158.0924       | 79.5498          |                |                  | 1  |

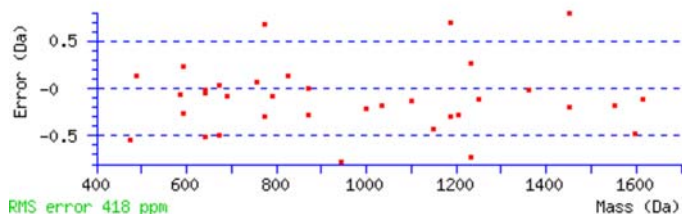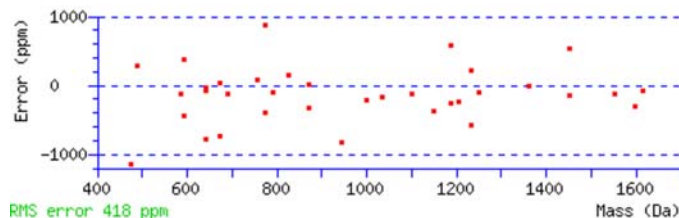

NCBI BLAST search of [AAPTSNFTVGSDGPPSFR](#)

(Parameters: blastp, nr protein database, expect=20000, no filter, PAM30)

Other BLAST [web gateways](#)

All matches to this query

| Score | Mr(calc): | Delta  | Sequence                           |
|-------|-----------|--------|------------------------------------|
| 64.5  | 1788.8432 | 1.0796 | <a href="#">AAPTSNFTVGSDGPPSFR</a> |
| 42.5  | 1788.8432 | 1.0796 | <a href="#">AAPTSNFTVGSDGPPSFR</a> |
| 37.4  | 1788.8432 | 1.0796 | <a href="#">AAPTSNFTVGSDGPPSFR</a> |
| 26.5  | 1788.8151 | 1.1076 | <a href="#">KMTTMIASSTLSPSR</a>    |
| 26.5  | 1788.8151 | 1.1076 | <a href="#">KMTTMIASSTLSPSR</a>    |
| 26.5  | 1788.8151 | 1.1076 | <a href="#">KMTTMIASSTLSPSR</a>    |
| 26.5  | 1788.8151 | 1.1076 | <a href="#">KMTTMIASSTLSPSR</a>    |
| 25.0  | 1788.8151 | 1.1076 | <a href="#">KMTTMIASSTLSPSR</a>    |
| 24.1  | 1788.8151 | 1.1076 | <a href="#">KMTTMIASSTLSPSR</a>    |
| 23.2  | 1788.8151 | 1.1076 | <a href="#">KMTTMIASSTLSPSR</a>    |

S16 -18  
S11 -18  
T8 -18

MS3: -98 Da  
triggered  
consecutive  
spectrum; top  
position  
assignment is  
same as in MS2;  
S16 [-18]

Mascot: <http://www.matrixscience.com/>
