# Supplementary material for: Proteomic responses in Arabidopsis thaliana seedlings treated with ethylene
Source: Royal Society of Chemistry journal article supplement (doi:10.1039/c1mb05159h), 2011-06-29
Supplement: c1mb05159h.zip [file c1mb05159h.zip]

# Mascot Search Results

## Peptide View

MS/MS Fragmentation of **LSSQGLLSPIPSR**

Found in **AT2G39130.1**, | Symbols: | amino acid transporter family protein | chr2:16330249-16333822 REVERSE

Match to Query 6: 1514.699804 from(758.357178,2+)

Title: PR2acn\_grad.4671.4671.2.dta

Data file C:\Users\CooperB\Desktop\Ray\mgfs\MS2special.txt

Click mouse within plot area to zoom in by factor of two about that point

Or,  200  1500

Label all possible matches ☐ Label matches used for scoring ☒

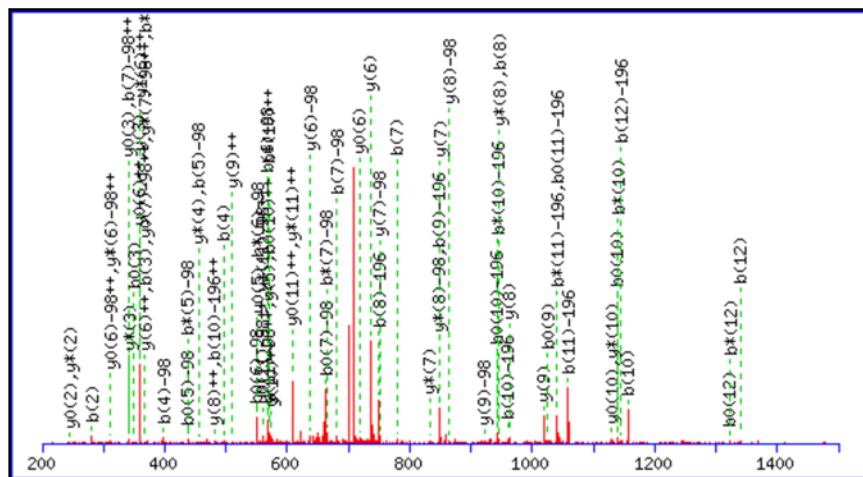

Monoisotopic mass of neutral peptide Mr(calc): 1513.6942

Fixed modifications: Carbamidomethyl (C) (apply to specified residues or termini only)

Variable modifications:

S2 : Phospho (ST), with neutral losses 97.9769(shown in table), 0.0000

S8 : Phospho (ST), with neutral losses 97.9769(shown in table), 0.0000

Ions Score: 32 Expect: 0.024

Matches : 74/238 fragment ions using 123 most intense peaks ([help](#))

| #  | b         | b <sup>++</sup> | b <sup>*</sup> | b <sup>*++</sup> | b <sup>0</sup> | b <sup>0++</sup> | Seq. | y         | y <sup>++</sup> | y <sup>*</sup> | y <sup>*++</sup> | y <sup>0</sup> | y <sup>0++</sup> | #  |
|----|-----------|-----------------|----------------|------------------|----------------|------------------|------|-----------|-----------------|----------------|------------------|----------------|------------------|----|
| 1  | 114.0913  | 57.5493         |                |                  |                |                  | L    |           |                 |                |                  |                |                  | 13 |
| 2  | 183.1128  | 92.0600         |                |                  | 165.1022       | 83.0548          | S    | 1205.6637 | 603.3355        | 1188.6371      | 594.8222         | 1187.6531      | 594.3302         | 12 |
| 3  | 270.1448  | 135.5761        |                |                  | 252.1343       | 126.5708         | S    | 1136.6422 | 568.8248        | 1119.6157      | 560.3115         | 1118.6317      | 559.8195         | 11 |
| 4  | 398.2034  | 199.6053        | 381.1769       | 191.0921         | 380.1928       | 190.6001         | Q    | 1049.6102 | 525.3087        | 1032.5837      | 516.7955         | 1031.5996      | 516.3035         | 10 |
| 5  | 455.2249  | 228.1161        | 438.1983       | 219.6028         | 437.2143       | 219.1108         | G    | 921.5516  | 461.2795        | 904.5251       | 452.7662         | 903.5411       | 452.2742         | 9  |
| 6  | 568.3089  | 284.6581        | 551.2824       | 276.1448         | 550.2984       | 275.6528         | L    | 864.5302  | 432.7687        | 847.5036       | 424.2554         | 846.5196       | 423.7634         | 8  |
| 7  | 681.3930  | 341.2001        | 664.3665       | 332.6869         | 663.3824       | 332.1949         | L    | 751.4461  | 376.2267        | 734.4195       | 367.7134         | 733.4355       | 367.2214         | 7  |
| 8  | 750.4145  | 375.7109        | 733.3879       | 367.1976         | 732.4039       | 366.7056         | S    | 638.3620  | 319.6847        | 621.3355       | 311.1714         | 620.3515       | 310.6794         | 6  |
| 9  | 847.4672  | 424.2373        | 830.4407       | 415.7240         | 829.4567       | 415.2320         | P    | 569.3406  | 285.1739        | 552.3140       | 276.6606         | 551.3300       | 276.1686         | 5  |
| 10 | 960.5513  | 480.7793        | 943.5247       | 472.2660         | 942.5407       | 471.7740         | I    | 472.2878  | 236.6475        | 455.2613       | 228.1343         | 454.2772       | 227.6423         | 4  |
| 11 | 1057.6041 | 529.3057        | 1040.5775      | 520.7924         | 1039.5935      | 520.3004         | P    | 359.2037  | 180.1055        | 342.1772       | 171.5922         | 341.1932       | 171.1002         | 3  |
| 12 | 1144.6361 | 572.8217        | 1127.6095      | 564.3084         | 1126.6255      | 563.8164         | S    | 262.1510  | 131.5791        | 245.1244       | 123.0659         | 244.1404       | 122.5738         | 2  |
| 13 |           |                 |                |                  |                |                  | R    | 175.1190  | 88.0631         | 158.0924       | 79.5498          |                |                  | 1  |

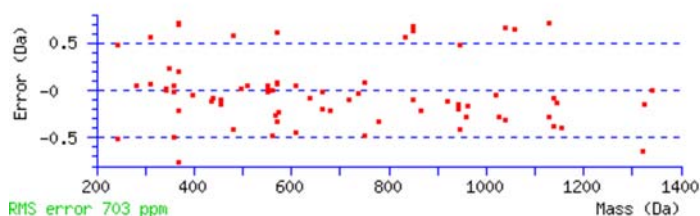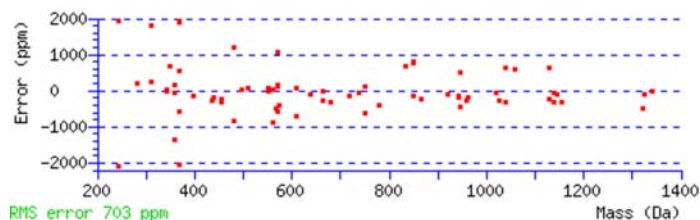

NCBI BLAST search of [LSSQGLLSPIPSR](#)

(Parameters: blastp, nr protein database, expect=20000, no filter, PAM30)

Other BLAST [web gateways](#)

All matches to this query

| Score | Mr(calc): | Delta  | Sequence                        |
|-------|-----------|--------|---------------------------------|
| 31.7  | 1513.6942 | 1.0056 | <a href="#">LSSQGLLSPIPSR</a>   |
| 30.6  | 1513.6942 | 1.0056 | <a href="#">LSSQGLLSPIPSR</a>   |
| 18.3  | 1513.6942 | 1.0056 | <a href="#">LSSQGLLSPIPSR</a>   |
| 17.4  | 1513.6942 | 1.0056 | <a href="#">LSSQGLLSPIPSR</a>   |
| 16.1  | 1513.6942 | 1.0056 | <a href="#">LSSQGLLSPIPSR</a>   |
| 11.3  | 1513.6831 | 1.0167 | <a href="#">SRVYSDEMTSSPR</a>   |
| 8.7   | 1514.6986 | 0.0012 | <a href="#">MEVVAVGSMKTQR</a>   |
| 6.2   | 1514.6905 | 0.0093 | <a href="#">YPELTTEGSPTIK</a>   |
| 5.8   | 1513.6814 | 1.0184 | <a href="#">FGGPTEVTSGGNALK</a> |
| 5.8   | 1513.6814 | 1.0184 | <a href="#">FGGPTEVTSGGNALK</a> |

-98 neutral loss; S2, S8 -18  
 -98 neutral loss; S3, S8 -18  
 -98 neutral loss; S2, S12 -18  
 -98 neutral loss; S3, S12 -18  
 -98 neutral loss; S2, S3 -18

MS2: Top match score of 31.7 has probability of 97% but is close to second score for a different position assignment; b and y ions found for S8 [-18] in each but only deduced for S2 [-18] or S3 [-18]. However, in MS3, b and y ions found for S8 [-18] and y ion found for unmodified S3, meaning that S2 [-18]. High position confidence.

Mascot: <http://www.matrixscience.com/>

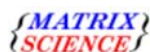

## Mascot Search Results

### Peptide View

MS/MS Fragmentation of **LSSQGLSPIR**

Found in **AT2G39130.1**, | Symbols: | amino acid transporter family protein | chr2:16330249-16333822 REVERSE

Match to Query 3: 1415.806724 from(708.910638,2+)

Title: PR2acn\_grad.4672.4672.2.dta

Data file C:\Users\CooperB\Desktop\Ray\mgfs\MS3special.txt

Click mouse within plot area to zoom in by factor of two about that point.

Or, Plot from 300 to 1250 Da Full range

Label all possible matches ☐ Label matches used for scoring ☒

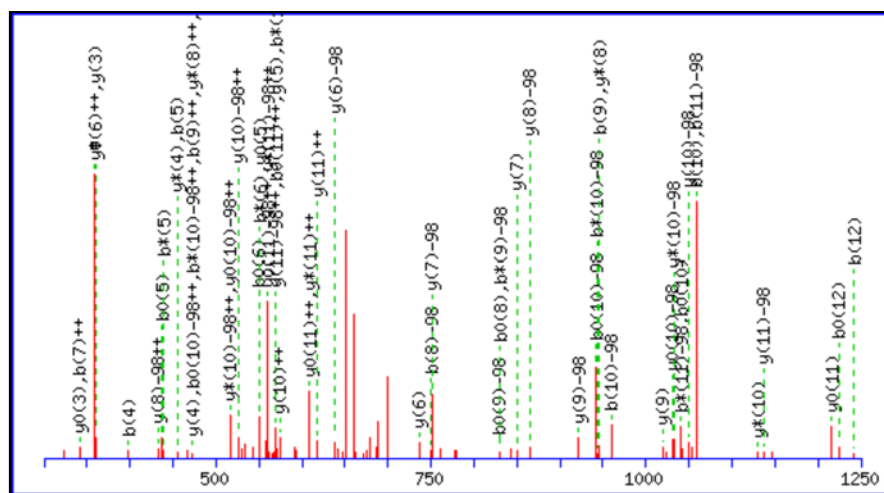

Monoisotopic mass of neutral peptide Mr(calc): 1415.7174

**Fixed modifications:** Carbamidomethyl (C) (apply to specified residues or termini only)

## Variable modifications:

```
S2      : Dehydrated (S)
```

```
s8      : Phospho (ST), with neutral losses 97.9769(shown in table), 0.0000
```

Ions Score: 63 Expect: 0.00064

**Matches** : 61/206 fragment ions using 63 most intense peaks ([help](#))

| #  | <b>b</b>  | <b>b<sup>++</sup></b> | <b>b*</b> | <b>b<sup>*++</sup></b> | <b>b<sup>0</sup></b> | <b>b<sup>0++</sup></b> | Seq. | <b>y</b>  | <b>y<sup>++</sup></b> | <b>y*</b> | <b>y<sup>*++</sup></b> | <b>y<sup>0</sup></b> | <b>y<sup>0++</sup></b> |
|----|-----------|-----------------------|-----------|------------------------|----------------------|------------------------|------|-----------|-----------------------|-----------|------------------------|----------------------|------------------------|
| 1  | 114.0913  | 57.5493               |           |                        |                      |                        | L    |           |                       |           |                        |                      |                        |
| 2  | 183.1128  | 92.0600               |           |                        | 165.1022             | 83.0548                | S    | 1205.6637 | 603.3355              | 1188.6371 | 594.8222               | 1187.6531            | 594.3302               |
| 3  | 270.1448  | 135.5761              |           |                        | 252.1343             | 126.5708               | S    | 1136.6422 | 568.8248              | 1119.6157 | 560.3115               | 1118.6317            | 559.8195               |
| 4  | 398.2034  | 199.6053              | 381.1769  | 191.0921               | 380.1928             | 190.6001               | Q    | 1049.6102 | 525.3087              | 1032.5837 | 516.7955               | 1031.5996            | 516.3035               |
| 5  | 455.2249  | 228.1161              | 438.1983  | 219.6028               | 437.2143             | 219.1108               | G    | 921.5516  | 461.2795              | 904.5251  | 452.7662               | 903.5411             | 452.2742               |
| 6  | 568.3089  | 284.6581              | 551.2824  | 276.1448               | 550.2984             | 275.6528               | L    | 864.5302  | 432.7687              | 847.5036  | 424.2554               | 846.5196             | 423.7634               |
| 7  | 681.3930  | 341.2001              | 664.3665  | 332.6869               | 663.3824             | 332.1949               | L    | 751.4461  | 376.2267              | 734.4196  | 367.7134               | 733.4355             | 367.2214               |
| 8  | 750.4145  | 375.7109              | 733.3879  | 367.1976               | 732.4039             | 366.7056               | S    | 638.3620  | 319.6847              | 621.3355  | 311.1714               | 620.3515             | 310.6794               |
| 9  | 847.4672  | 424.2373              | 830.4407  | 415.7240               | 829.4567             | 415.2320               | P    | 569.3406  | 285.1739              | 552.3140  | 276.6606               | 551.3300             | 276.1686               |
| 10 | 960.5513  | 480.7793              | 943.5247  | 472.2660               | 942.5407             | 471.7740               | I    | 472.2878  | 236.6475              | 455.2613  | 228.1343               | 454.2772             | 227.6423               |
| 11 | 1057.6041 | 529.3057              | 1040.5775 | 520.7924               | 1039.5935            | 520.3004               | P    | 359.2037  | 180.1055              | 342.1772  | 171.5922               | 341.1932             | 171.1002               |
| 12 | 1144.6361 | 572.8217              | 1127.6095 | 564.3084               | 1126.6255            | 563.8164               | S    | 262.1510  | 131.5791              | 245.1244  | 123.0659               | 244.1404             | 122.5738               |
| 13 |           |                       |           |                        |                      |                        | R    | 175.1190  | 88.0631               | 158.0924  | 79.5498                |                      |                        |

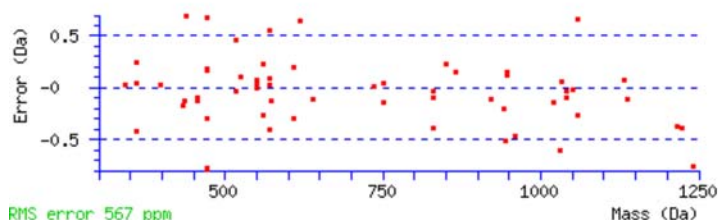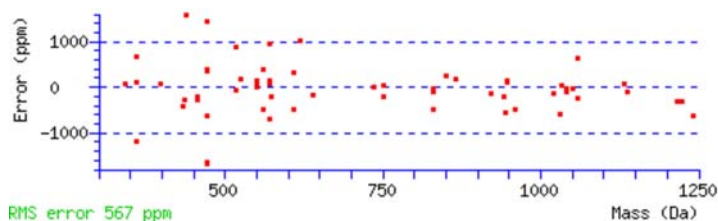

NCBI BLAST search of [LSSQGLLSPIPSR](#)

(Parameters: blastp, nr protein database, expect=20000, no filter, PAM30)

Other BLAST [web gateways](#)

**All matches to this query**

| Score | Mr(calc): | Delta  | Sequence                      |
|-------|-----------|--------|-------------------------------|
| 63.4  | 1415.7174 | 0.0893 | <a href="#">LSSQGLLSPIPSR</a> |
| 57.7  | 1415.7174 | 0.0893 | <a href="#">LSSQGLLSPIPSR</a> |
| 52.7  | 1415.7174 | 0.0893 | <a href="#">LSSQGLLSPIPSR</a> |
| 48.7  | 1415.7174 | 0.0893 | <a href="#">LSSQGLLSPIPSR</a> |
| 44.8  | 1415.7174 | 0.0893 | <a href="#">LSSQGLLSPIPSR</a> |
| 40.1  | 1415.7174 | 0.0893 | <a href="#">LSSQGLLSPIPSR</a> |
| 35.0  | 1415.7174 | 0.0893 | <a href="#">LSSQGLLSPIPSR</a> |
| 31.9  | 1415.7174 | 0.0893 | <a href="#">LSSQGLLSPIPSR</a> |
| 22.8  | 1415.7174 | 0.0893 | <a href="#">LSSQGLLSPIPSR</a> |
| 22.8  | 1415.7174 | 0.0893 | <a href="#">LSSQGLLSPIPSR</a> |

S2 -18; neutral loss -98, so S8 -18  
 neutral loss -98, so S2 -18; S8 -18  
 S3 -18; neutral loss -98, so S8 -18  
 neutral loss -98, so S3 -18; S8 -18  
 S2 -18; neutral loss -98, so S12 -18

MS3: -98 Da  
 triggered  
 consecutive  
 spectrum. Top  
 match  
 phosphorylation  
 position  
 assignment  
 corroborates top  
 MS2 assignment. b  
 and y ions found  
 for S8 [-18]; y ion  
 found for  
 unmodified S3, so  
 S2 must be [-18].

Mascot: <http://www.matrixscience.com/>
